# Supplementary material for: The Polyketides with Antimicrobial Activities from a Mangrove Endophytic Fungus Trichoderma lentiforme ML-P8-2
Source: MDPI journal article supplement (doi:10.3390/md21110566), 2023-10-28
Supplement: s1 [file s1]

# Supplementary Materials

## The Polyketides with Antimicrobial Activities from a Mangrove Endophytic Fungus *Trichoderma lentiforme* ML-P8-2

Yihao Yin, Qi Tan, Jianying Wu, Tao Chen, Wencong Yang, Zhigang She, and Bo Wang \*

School of Chemistry, Sun Yat-sen University, Guangzhou 510006, China; yinyh6@mail2.sysu.edu.cn (Y.Y.); tanq27@mail2.sysu.edu.cn (Q.T.); wujy89@mail2.sysu.edu.cn (J.W.); chent296@mail2.sysu.edu.cn (T.C.); yangwc6@mail2.sysu.edu.cn (W.Y.); cesszhzg@mail.sysu.edu.cn (Z.S.)

\* Correspondence: ceswb@mail.sysu.edu.cn

**Abstract:** Five new polyketides, including two chromones (**1** – **2**), two phenyl derivatives (**4** – **5**), and a tandiyukusin derivative (**6**), along with five known polyketides (**3** and **7** – **10**) were isolated from mangrove endophytic fungus *Trichoderma lentiforme* ML-P8-2. The planar structures of compounds were elucidated through detailed 1D, 2D NMR and HR-ESI-MS analysis. ECD spectra, optical rotation values calculation and alkali-hydrolysis were applied in the determination of the absolute configuration of the new compounds. In bioassays, **6** and **9** exhibited promising antifungal activities against *Penicillium italicum*, with MIC both for 6.25  $\mu$ M. Besides, **3** displayed moderate AChE inhibitory activity with IC<sub>50</sub> for 20.6  $\pm$  0.3  $\mu$ M.

**Keywords:** mangrove endophytic fungus; *Trichoderma lentiforme*; polyketide; antimicrobial activity; AChE inhibitory activity

## List of Contents

|                                                                                       |     |
|---------------------------------------------------------------------------------------|-----|
| Figure S1. $^1\text{H}$ NMR spectrum of <b>1</b> in $\text{CD}_3\text{OD}$ .....      | S1  |
| Figure S2. $^{13}\text{C}$ NMR spectrum of <b>1</b> in $\text{CD}_3\text{OD}$ .....   | S1  |
| Figure S3. HSQC spectrum of <b>1</b> .....                                            | S2  |
| Figure S4. $^1\text{H}$ - $^1\text{H}$ COSY spectrum of <b>1</b> . ....               | S2  |
| Figure S5. HMBC spectrum of <b>1</b> .....                                            | S3  |
| Figure S6. NOESY spectrum of <b>1</b> . ....                                          | S3  |
| Figure S7. HR-ESI-MS spectrum of <b>1</b> .....                                       | S4  |
| Figure S8. UV-vis spectrum of <b>1</b> .....                                          | S4  |
| Figure S9. $^1\text{H}$ NMR spectrum of <b>2</b> in $\text{CD}_3\text{OD}$ .....      | S5  |
| Figure S10. $^{13}\text{C}$ NMR spectrum of <b>2</b> in $\text{CD}_3\text{OD}$ . .... | S5  |
| Figure S11. HSQC spectrum of <b>2</b> .....                                           | S6  |
| Figure S12. $^1\text{H}$ - $^1\text{H}$ COSY spectrum of <b>2</b> . ....              | S6  |
| Figure S13. HMBC spectrum of <b>2</b> .....                                           | S7  |
| Figure S14. HR-ESI-MS spectrum of <b>2</b> .....                                      | S7  |
| Figure S15. UV-vis spectrum of <b>2</b> .....                                         | S8  |
| Figure S16. $^1\text{H}$ NMR spectrum of <b>4</b> in $\text{DMSO}-d_6$ .....          | S8  |
| Figure S17. $^{13}\text{C}$ NMR spectrum of <b>4</b> in $\text{DMSO}-d_6$ . ....      | S9  |
| Figure S18. HSQC spectrum of <b>4</b> .....                                           | S9  |
| Figure S19. $^1\text{H}$ - $^1\text{H}$ COSY spectrum of <b>4</b> . ....              | S10 |
| Figure S20. HMBC spectrum of <b>4</b> .....                                           | S10 |
| Figure S21. NOESY spectrum of <b>4</b> . ....                                         | S11 |
| Figure S22. HR-ESI-MS spectrum of <b>4</b> .....                                      | S11 |
| Figure S23. UV-vis spectrum of <b>4</b> .....                                         | S12 |
| Figure S24. $^1\text{H}$ NMR spectrum of <b>5</b> in $\text{DMSO}-d_6$ .....          | S12 |
| Figure S25. $^{13}\text{C}$ NMR spectrum of <b>5</b> in $\text{DMSO}-d_6$ . ....      | S13 |
| Figure S26. HSQC spectrum of <b>5</b> .....                                           | S13 |
| Figure S27. $^1\text{H}$ - $^1\text{H}$ COSY spectrum of <b>5</b> . ....              | S14 |
| Figure S28. HMBC spectrum of <b>5</b> .....                                           | S14 |

|                                                                                                                                                                              |     |
|------------------------------------------------------------------------------------------------------------------------------------------------------------------------------|-----|
| <b>Figure S29.</b> NOESY spectrum of <b>5</b> . .....                                                                                                                        | S15 |
| <b>Figure S30.</b> HR-ESI-MS spectrum of <b>5</b> . .....                                                                                                                    | S15 |
| <b>Figure S31.</b> UV-vis spectrum of <b>5</b> . .....                                                                                                                       | S16 |
| <b>Figure S32.</b> <sup>1</sup> H NMR spectrum of <b>6</b> in CDCl <sub>3</sub> . .....                                                                                      | S16 |
| <b>Figure S33.</b> <sup>13</sup> C NMR spectrum of <b>6</b> in CDCl <sub>3</sub> . .....                                                                                     | S17 |
| <b>Figure S34.</b> HSQC spectrum of <b>6</b> . .....                                                                                                                         | S17 |
| <b>Figure S35.</b> <sup>1</sup> H- <sup>1</sup> H COSY spectrum of <b>6</b> . .....                                                                                          | S18 |
| <b>Figure S36.</b> HMBC spectrum of <b>6</b> . .....                                                                                                                         | S18 |
| <b>Figure S37.</b> NOESY spectrum of <b>6</b> . .....                                                                                                                        | S19 |
| <b>Figure S38.</b> HR-ESI-MS spectrum of <b>6</b> . .....                                                                                                                    | S19 |
| <b>Figure S39.</b> UV-vis spectrum of <b>6</b> . .....                                                                                                                       | S20 |
| <b>Figure S40.</b> <sup>1</sup> H NMR spectrum of eujavanicol A in CDCl <sub>3</sub> . .....                                                                                 | S20 |
| <b>Figure S41.</b> <sup>13</sup> C NMR spectrum of eujavanicol A in CDCl <sub>3</sub> . .....                                                                                | S21 |
| <b>Figure S42.</b> HR-ESI-MS spectrum of eujavanicol A. ....                                                                                                                 | S21 |
| <br>                                                                                                                                                                         |     |
| <b>Table S1.</b> Gibbs free energy and Boltzmann population of low energy conformers of (3' <i>R</i> , 5' <i>S</i> )- <b>1</b> in MeOH. ....                                 | S22 |
| <b>Table S2.</b> Gibbs free energy and Boltzmann population of low energy conformers of (3' <i>R</i> , 5' <i>R</i> )- <b>1</b> in MeOH. ....                                 | S22 |
| <b>Table S3.</b> Gibbs free energy and Boltzmann population of low energy conformers of <b>14S-5</b> in MeOH. 22                                                             |     |
| <b>Table S4.</b> Cartesian coordinates for the low-energy optimized conformers of (3' <i>R</i> , 5' <i>S</i> )- <b>1</b> at B3LYP/6-31+g (d,p) level of theory in MeOH. .... | S23 |
| <b>Table S5.</b> Cartesian coordinates for the low-energy optimized conformers of (3' <i>R</i> , 5' <i>R</i> )- <b>1</b> at B3LYP/6-31+g (d,p) level of theory in MeOH. .... | S30 |
| <b>Table S6.</b> Cartesian coordinates for the low-energy optimized conformers of <b>14S-5</b> at B3LYP/6-31+g (d,p) level of theory in MeOH. ....                           | S32 |

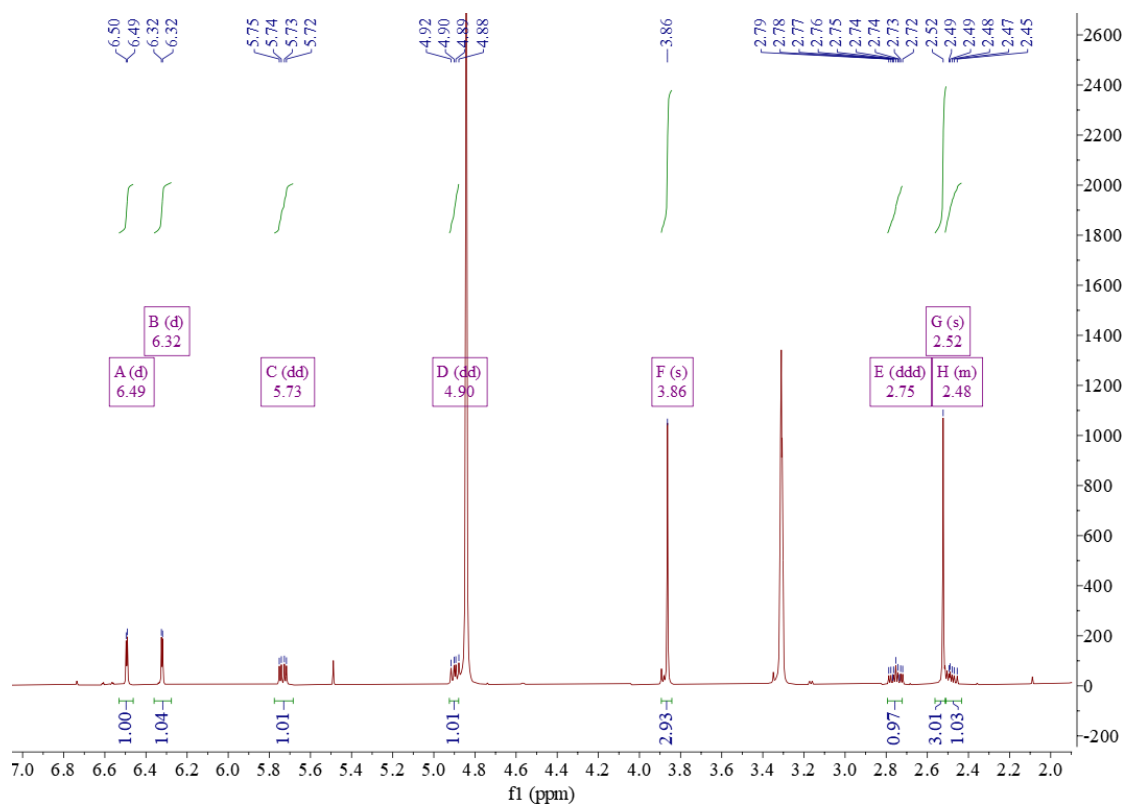

**Figure S1.** <sup>1</sup>H NMR spectrum of **1** in CD<sub>3</sub>OD.

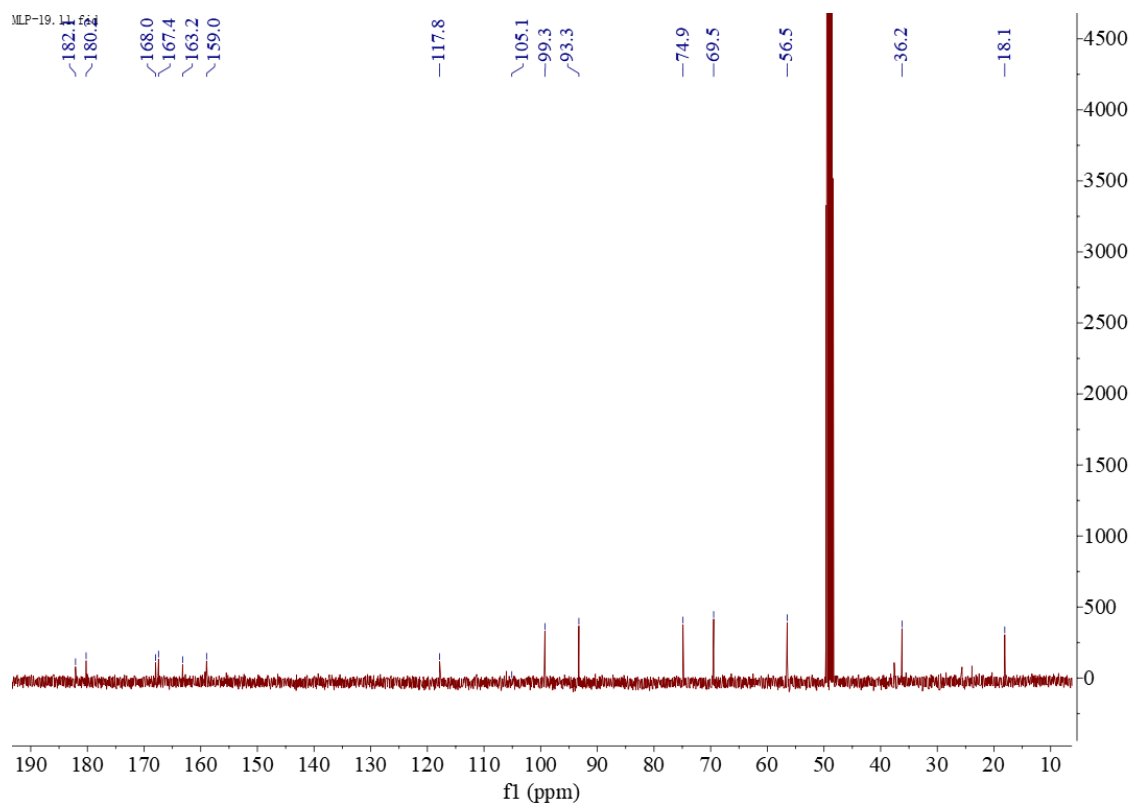

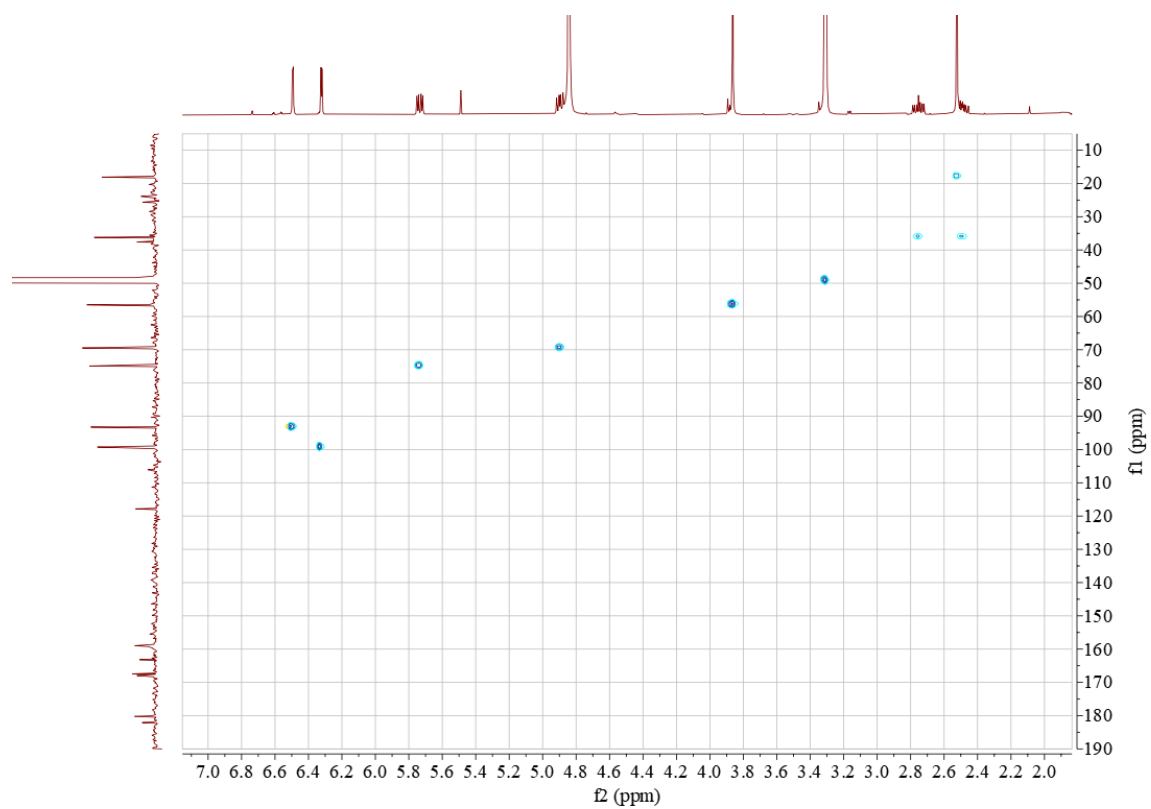

Figure S3. HSQC spectrum of 1.

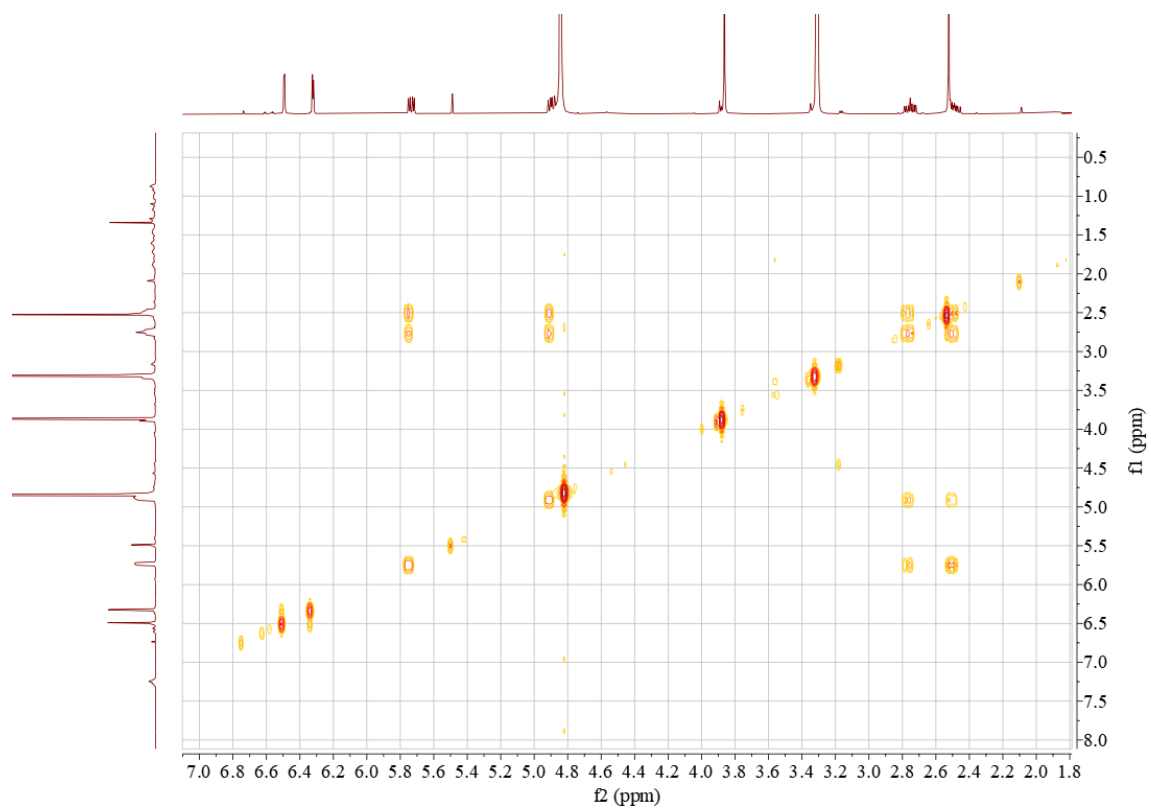

Figure S4.  $^1\text{H}$ - $^1\text{H}$  COSY spectrum of 1.

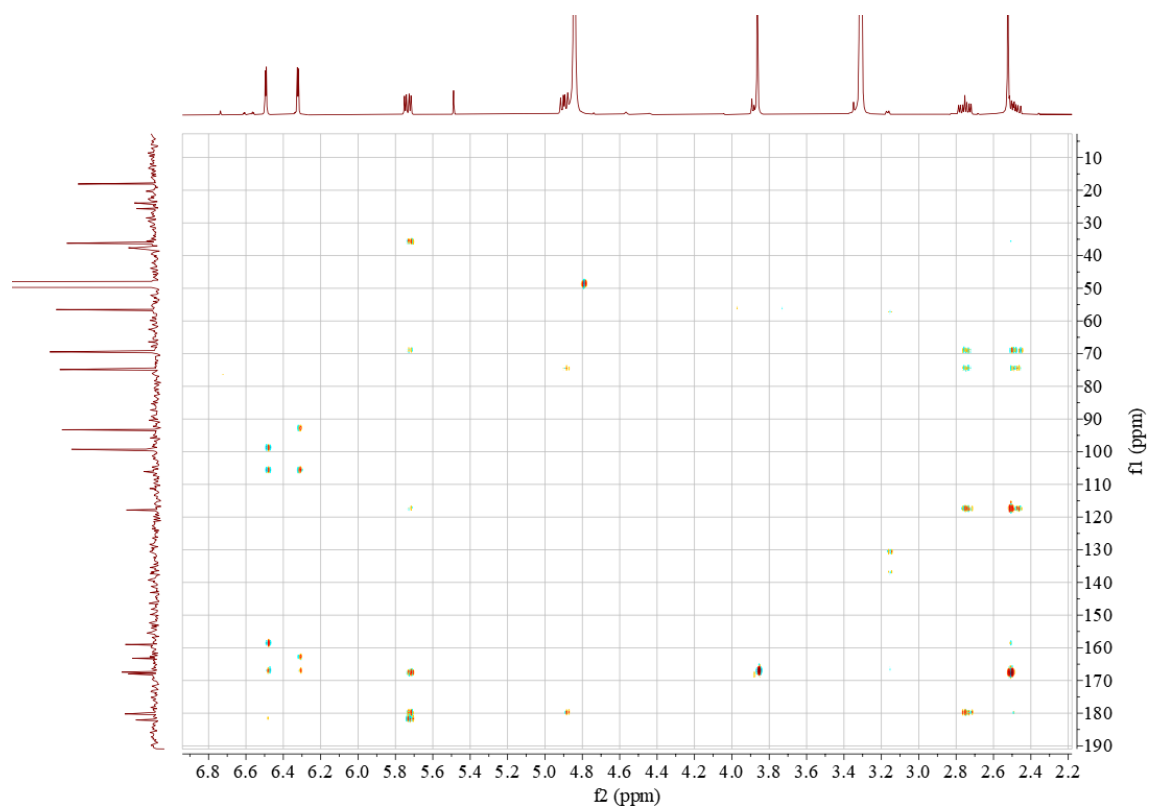

Figure S5. HMBC spectrum of 1.

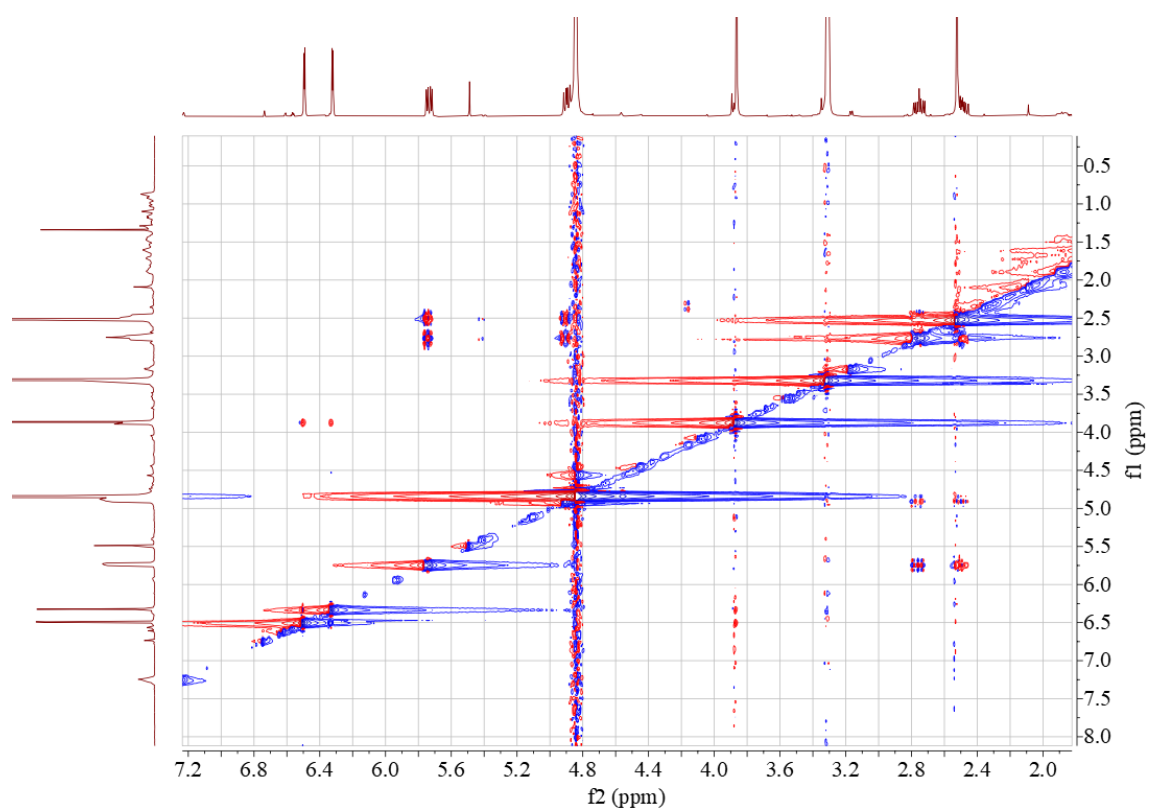

Figure S6. NOESY spectrum of 1.

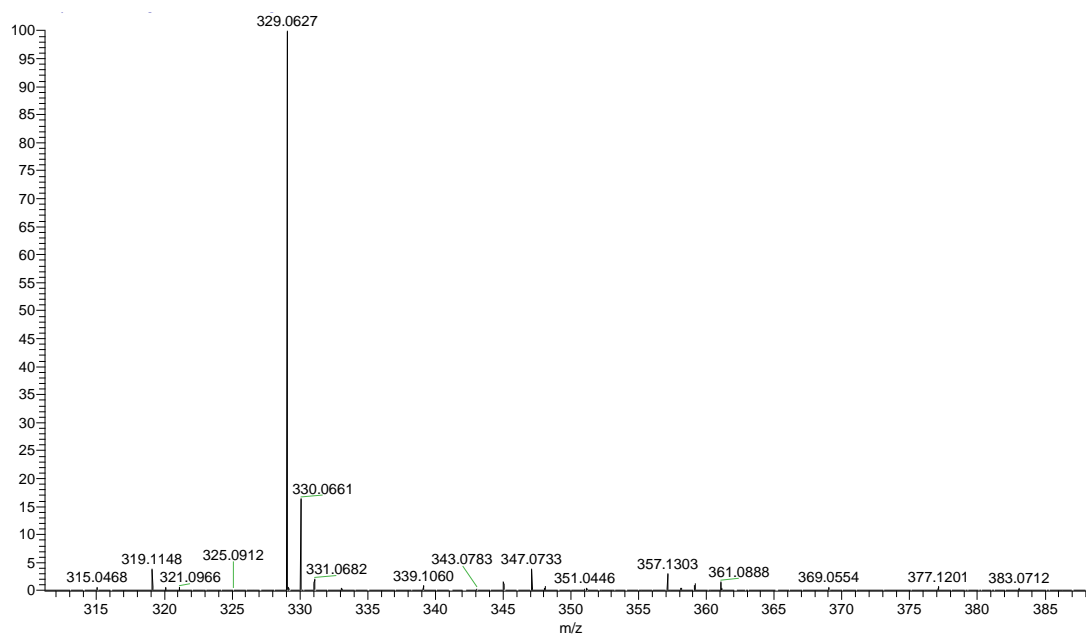

Figure S7. HR-ESI-MS spectrum of **1**.

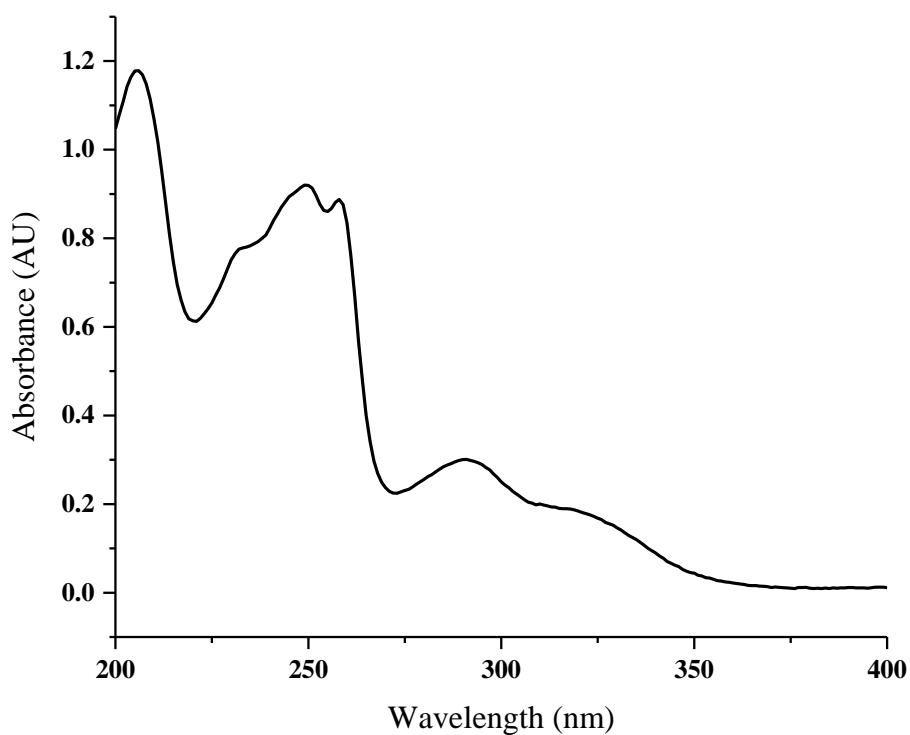

Figure S8. UV-vis spectrum of **1**.

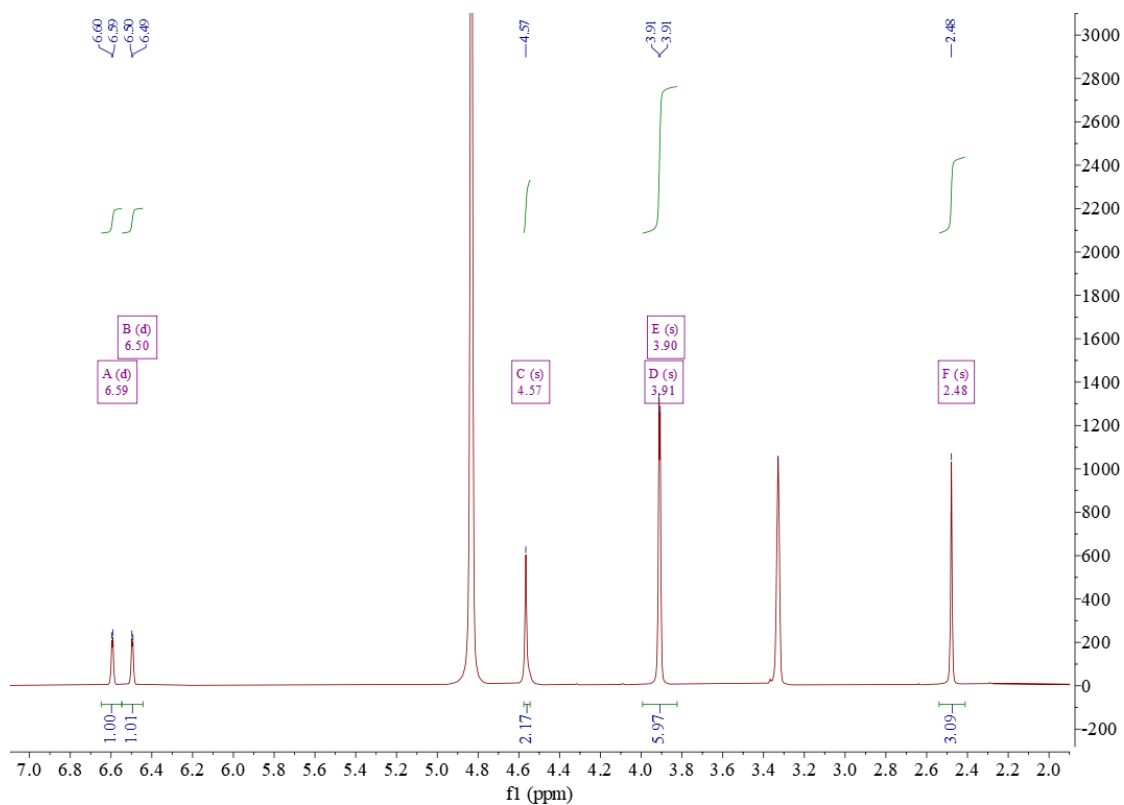

**Figure S9.** <sup>1</sup>H NMR spectrum of **2** in CD<sub>3</sub>OD.

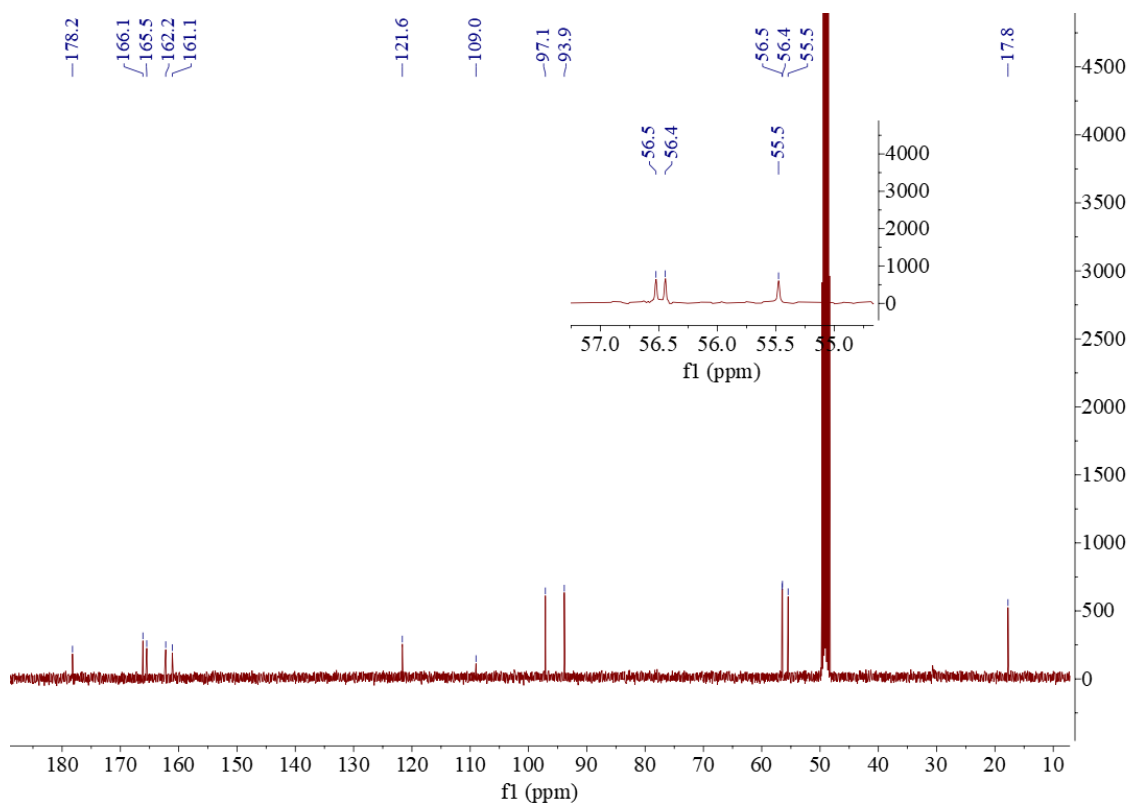

**Figure S10.** <sup>13</sup>C NMR spectrum of **2** in CD<sub>3</sub>OD.



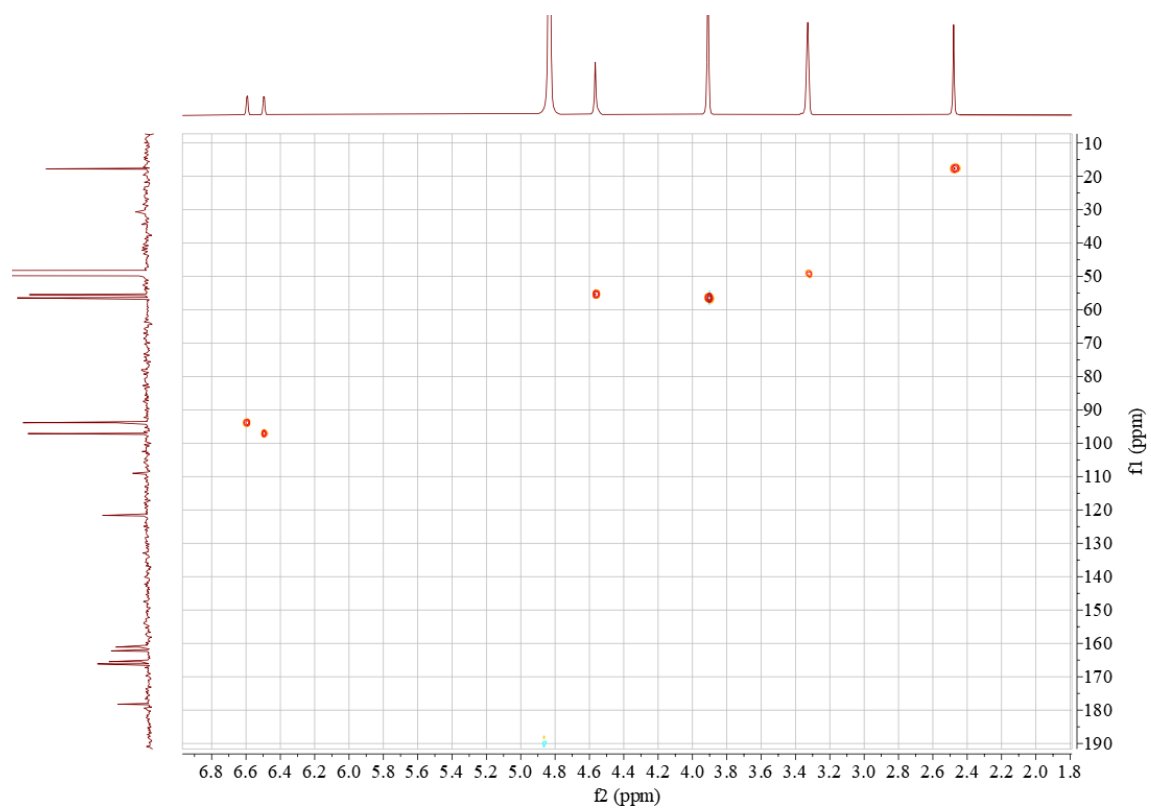

**Figure S11.** HSQC spectrum of **2**.

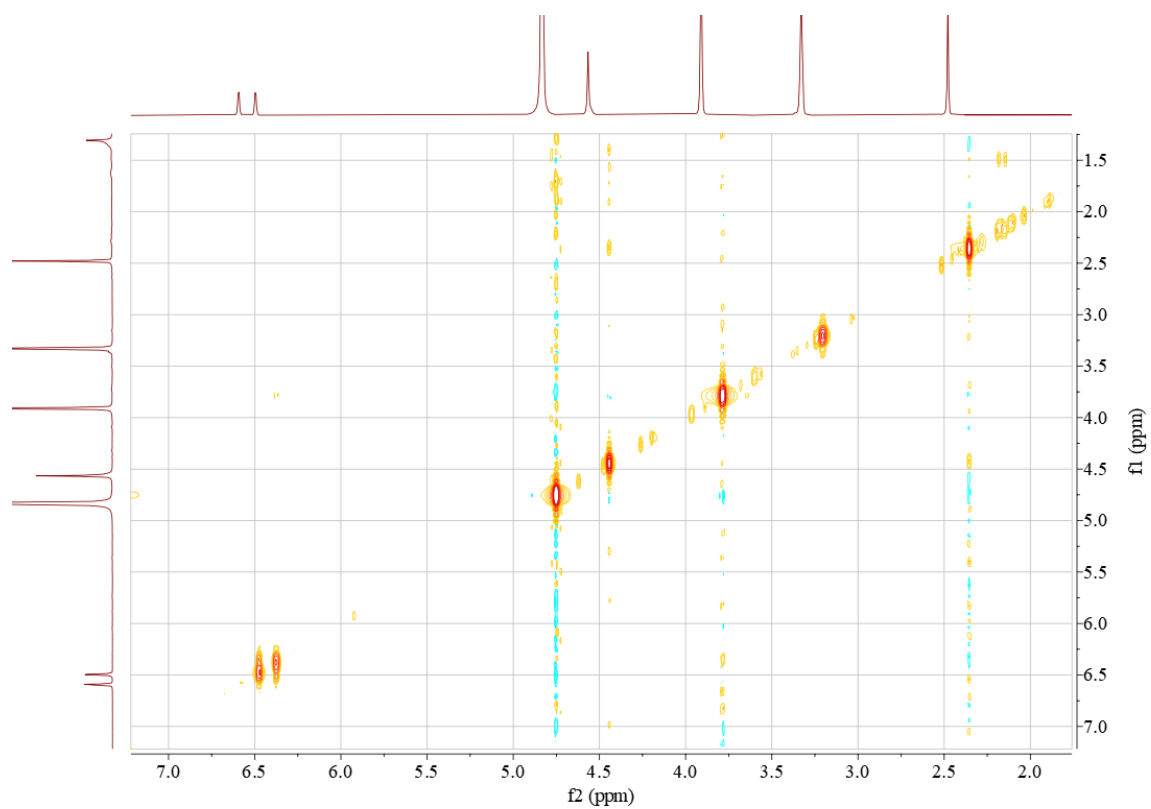

**Figure S12.**  $^1\text{H}$ - $^1\text{H}$  COSY spectrum of **2**.

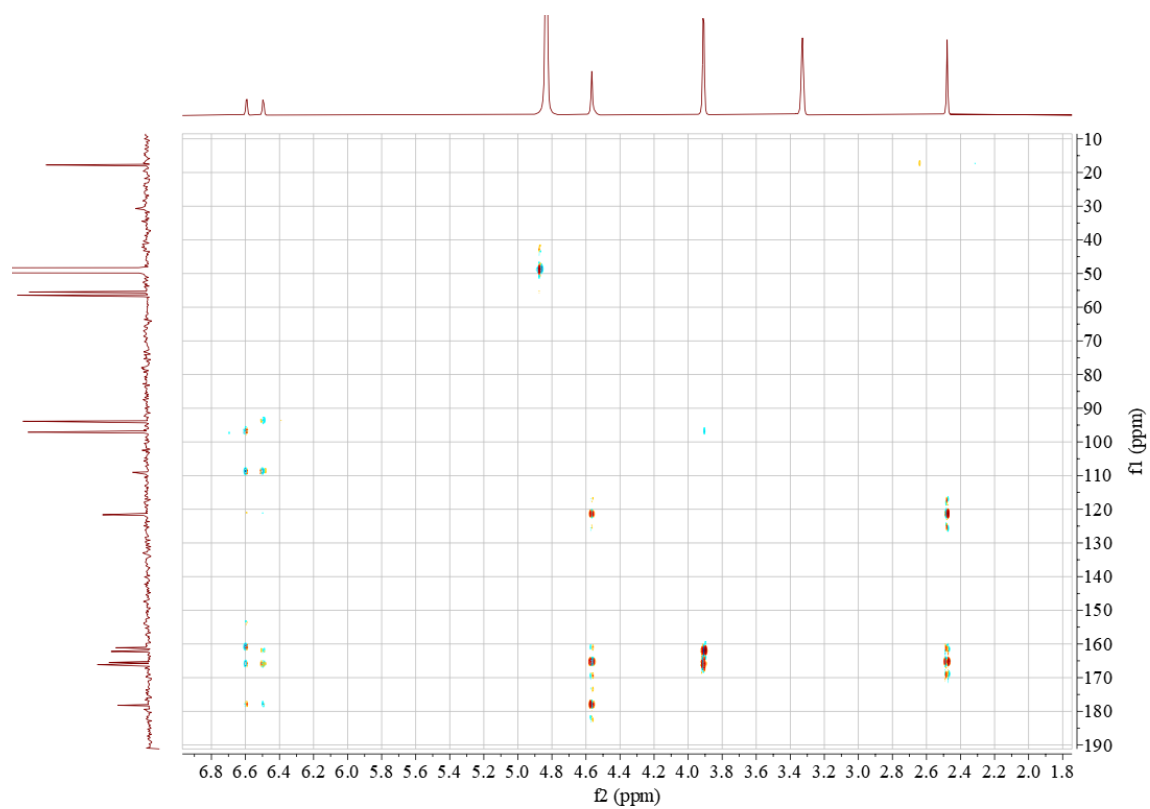

Figure S13. HMBC spectrum of 2.

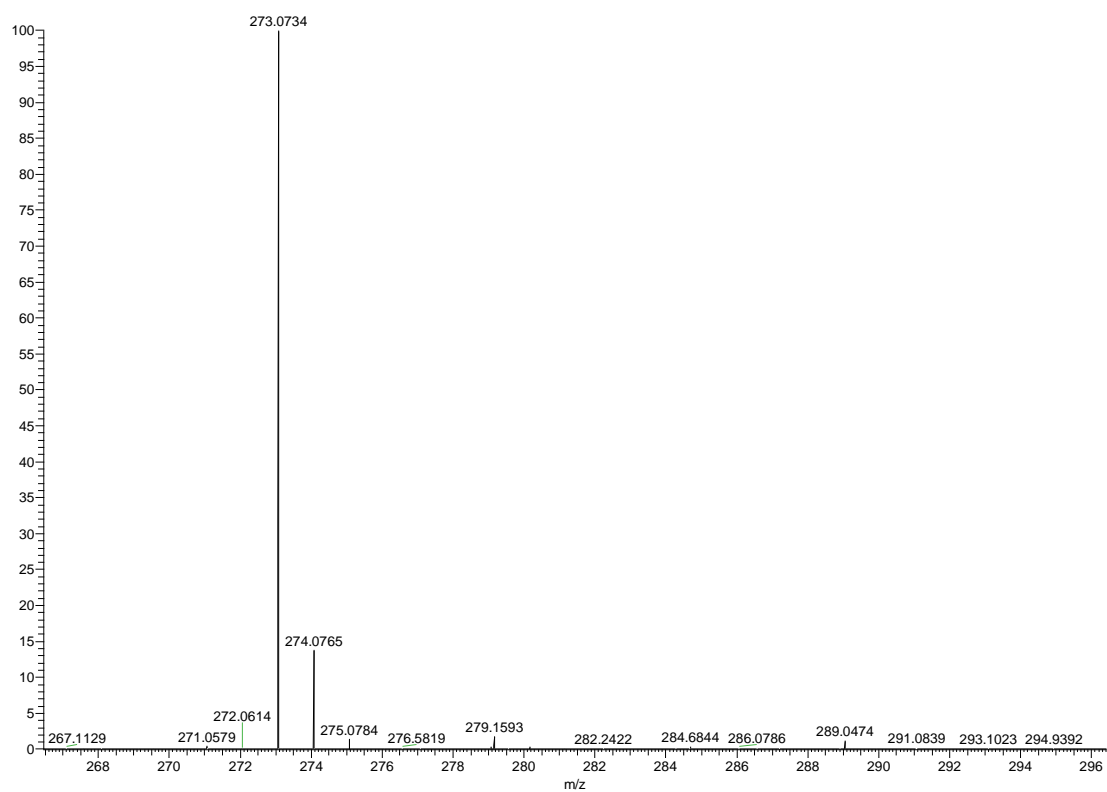

Figure S14. HR-ESI-MS spectrum of 2.

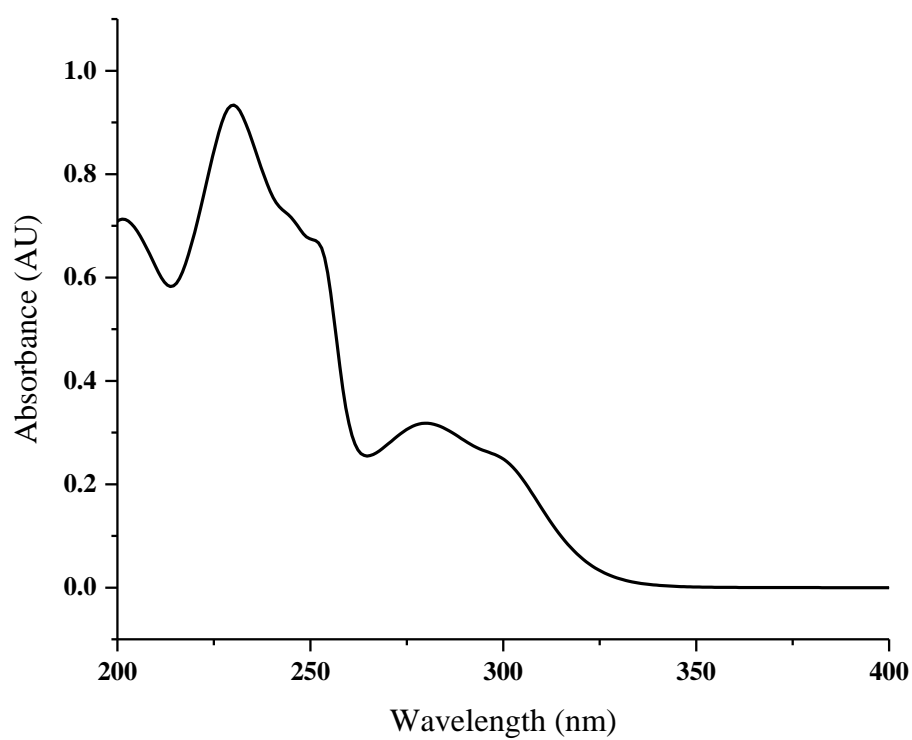

Figure S15. UV-vis spectrum of 2.

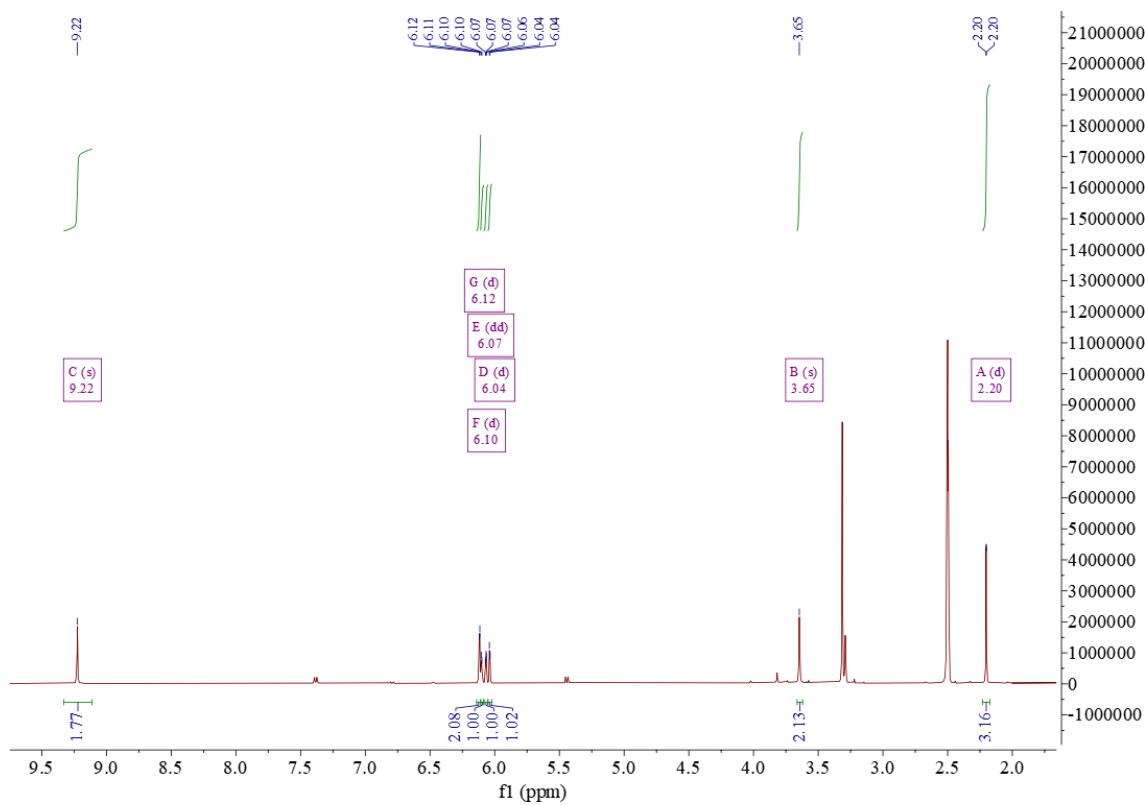

Figure S16.  $^1\text{H}$  NMR spectrum of 4 in  $\text{DMSO-}d_6$ .

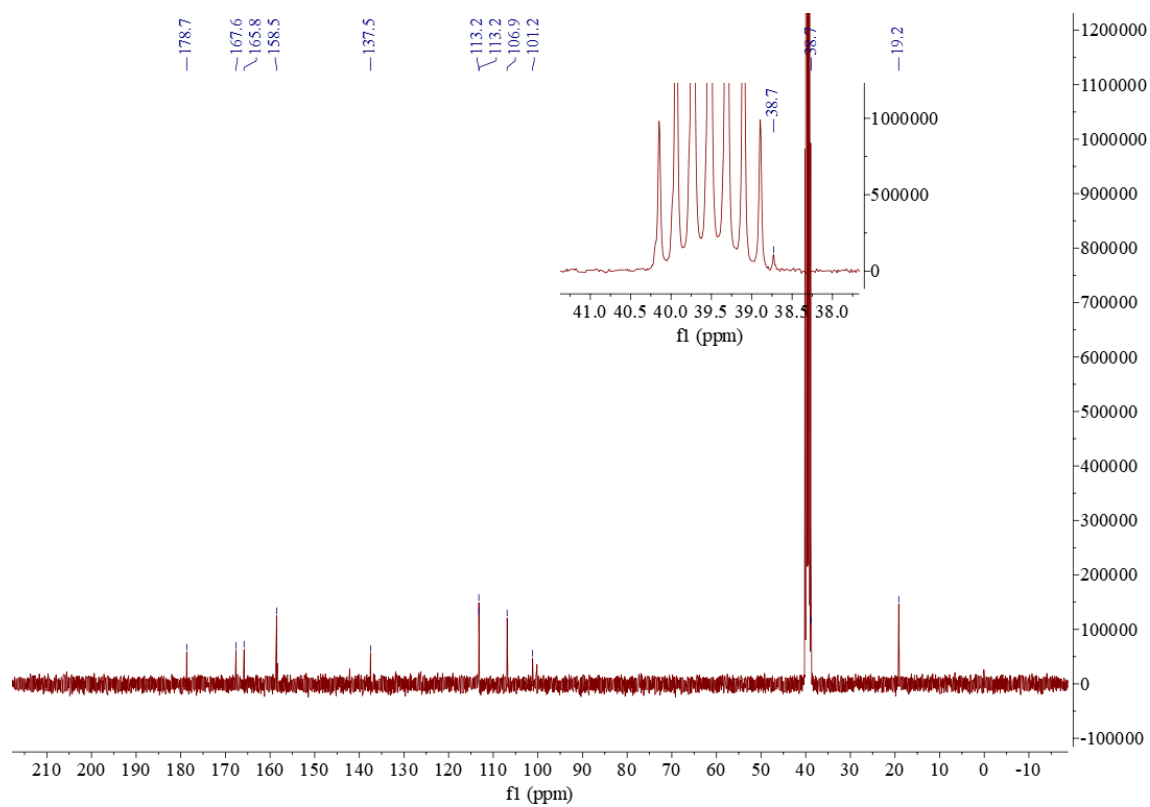

**Figure S17.**  $^{13}\text{C}$  NMR spectrum of **4** in  $\text{DMSO}-d_6$ .

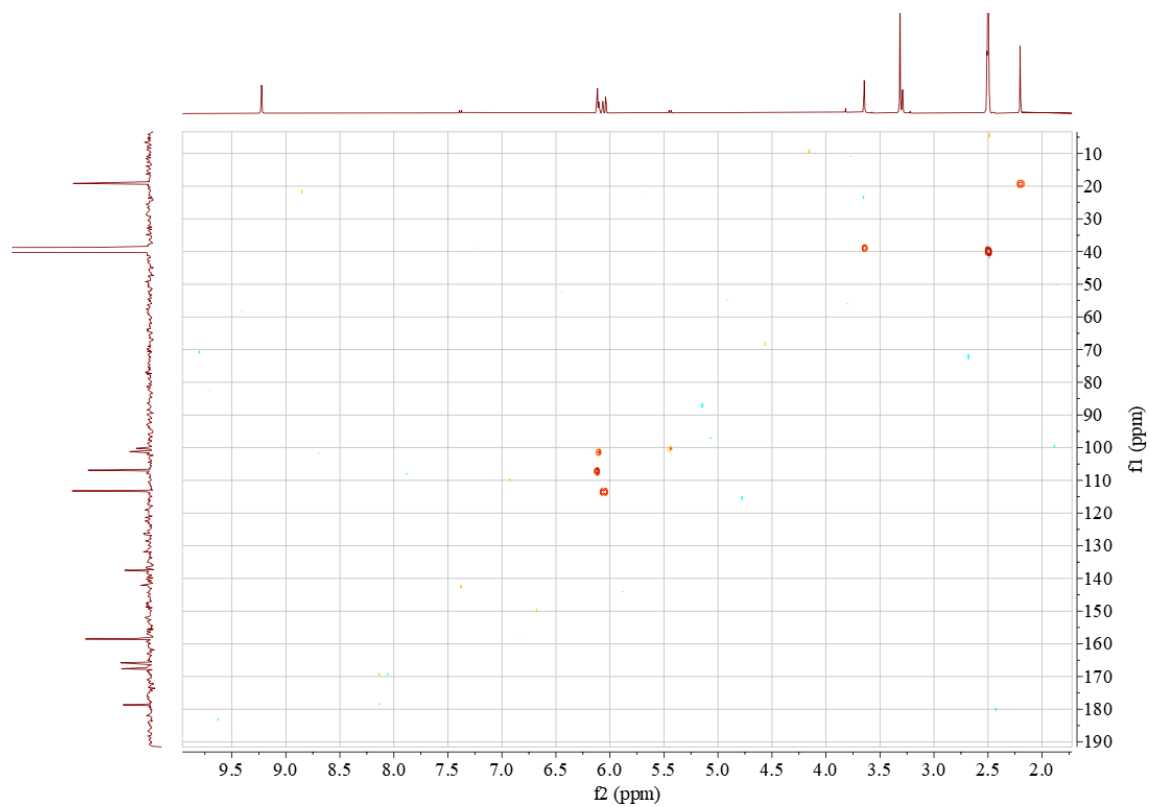

**Figure S18.** HSQC spectrum of **4**.

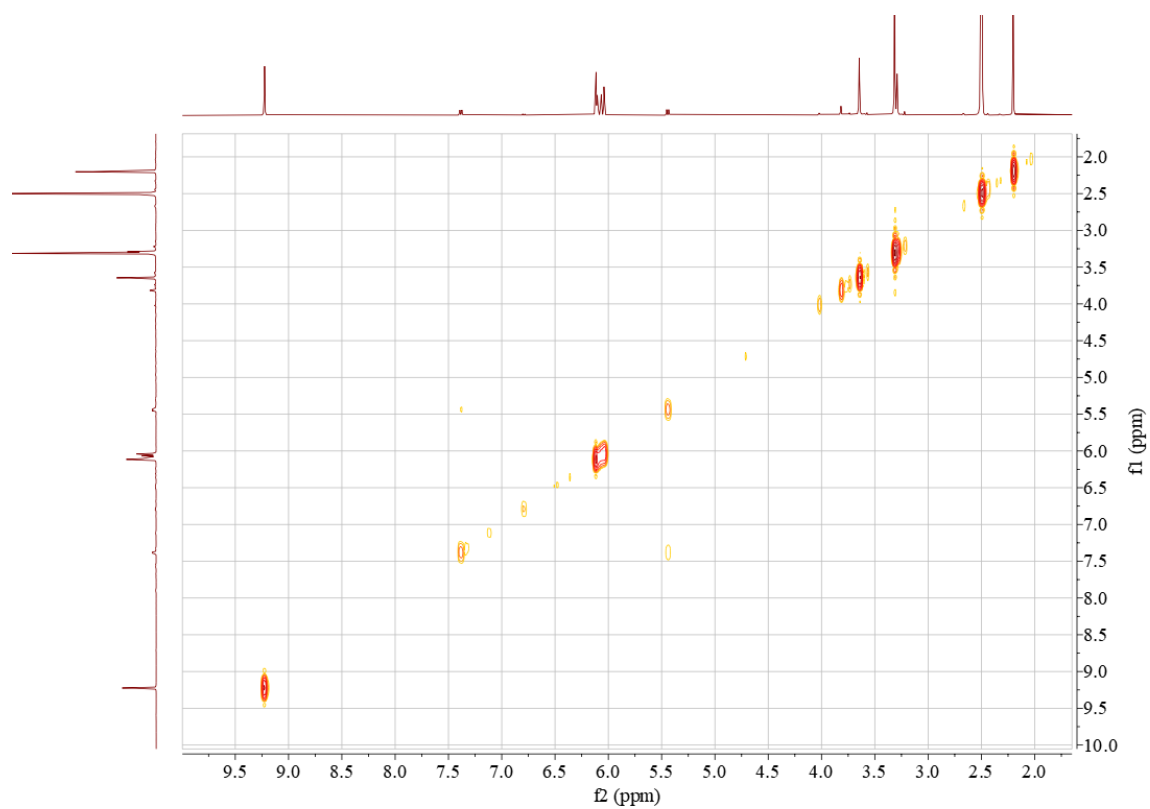

**Figure S19.**  $^1\text{H}$ - $^1\text{H}$  COSY spectrum of **4**.

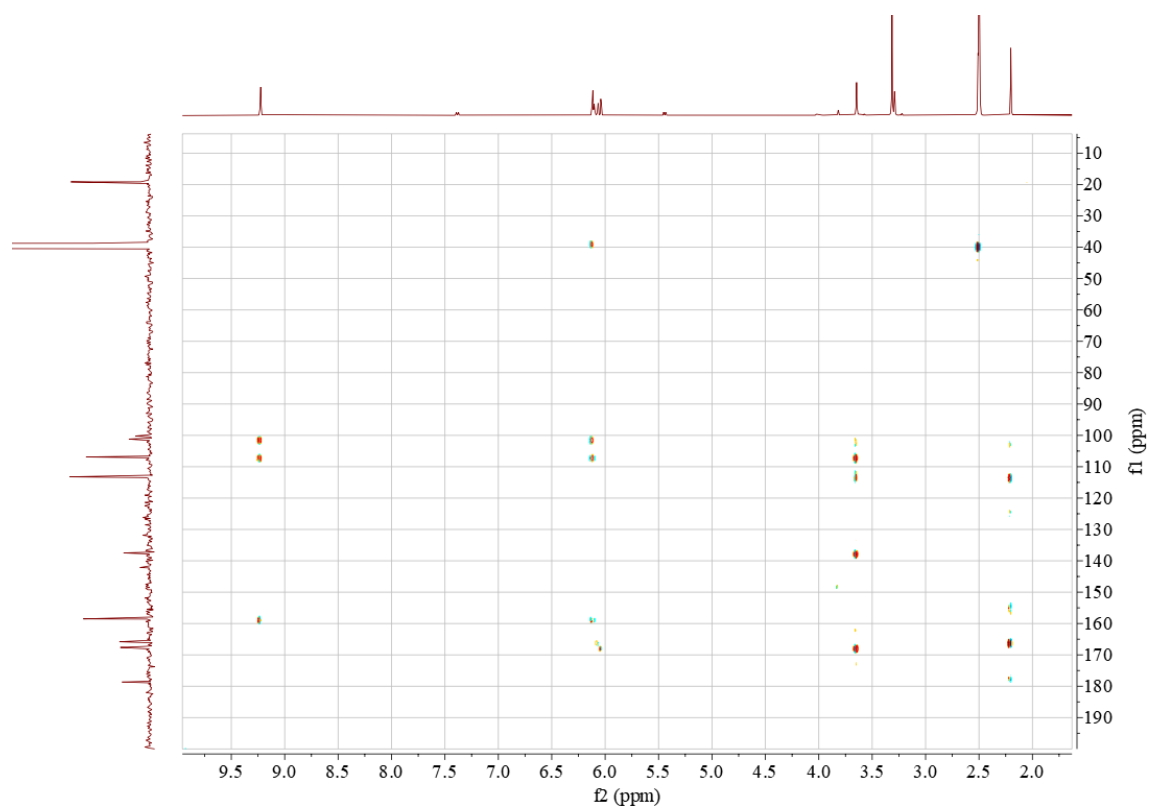

**Figure S20.** HMBC spectrum of **4**.

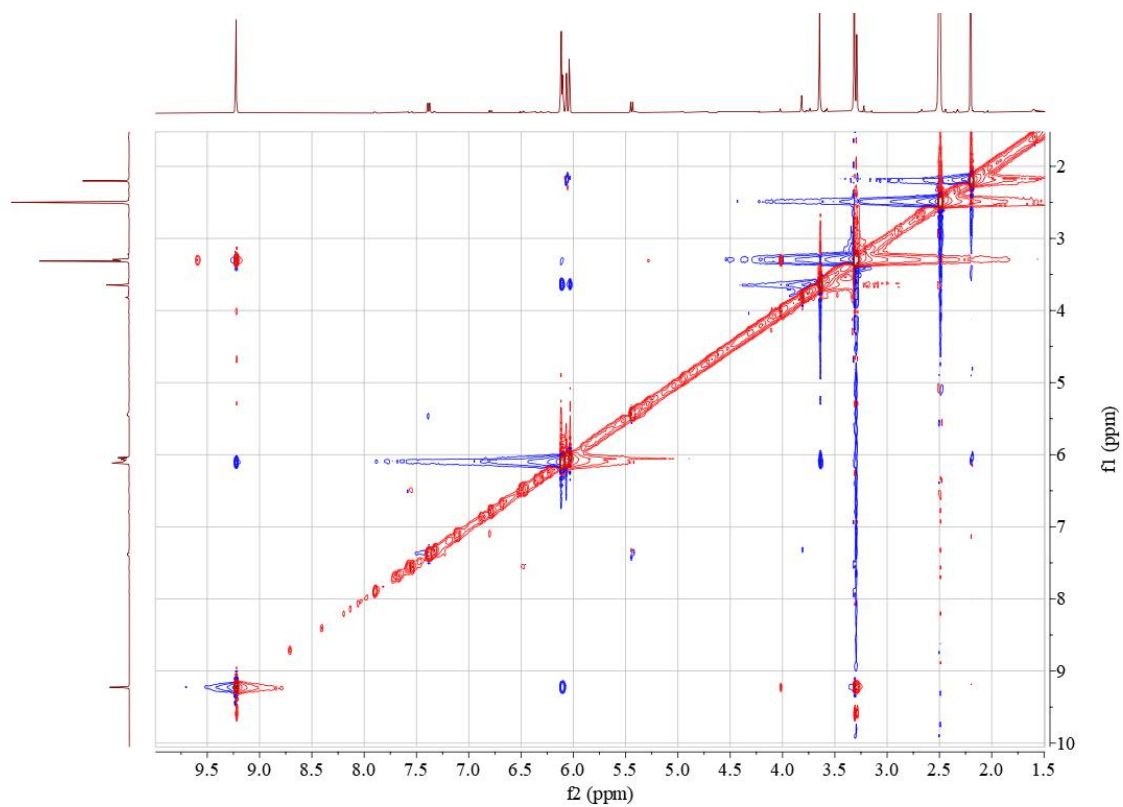

Figure S21. NOESY spectrum of **4**.

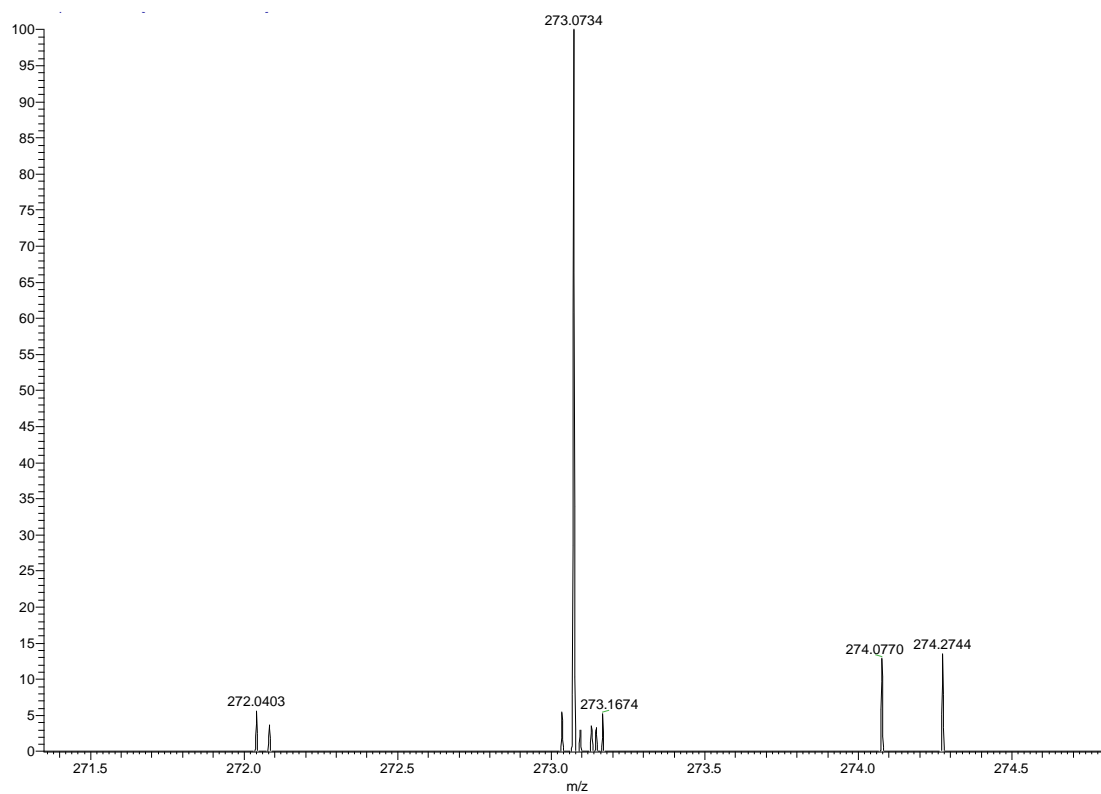

Figure S22. HR-ESI-MS spectrum of **4**.

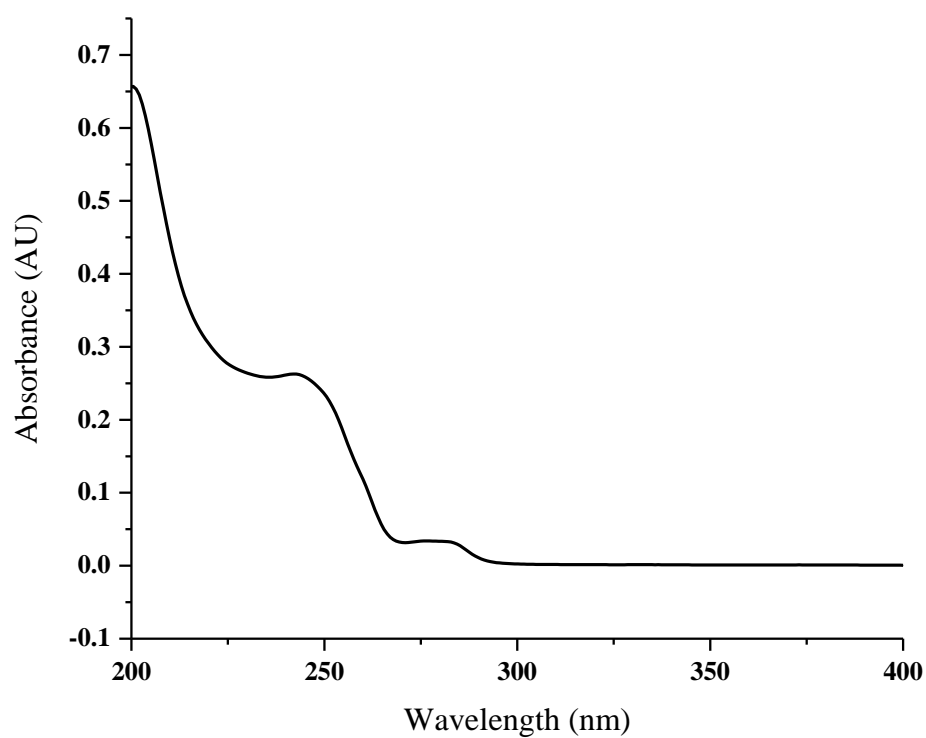

Figure S23. UV-vis spectrum of 4.

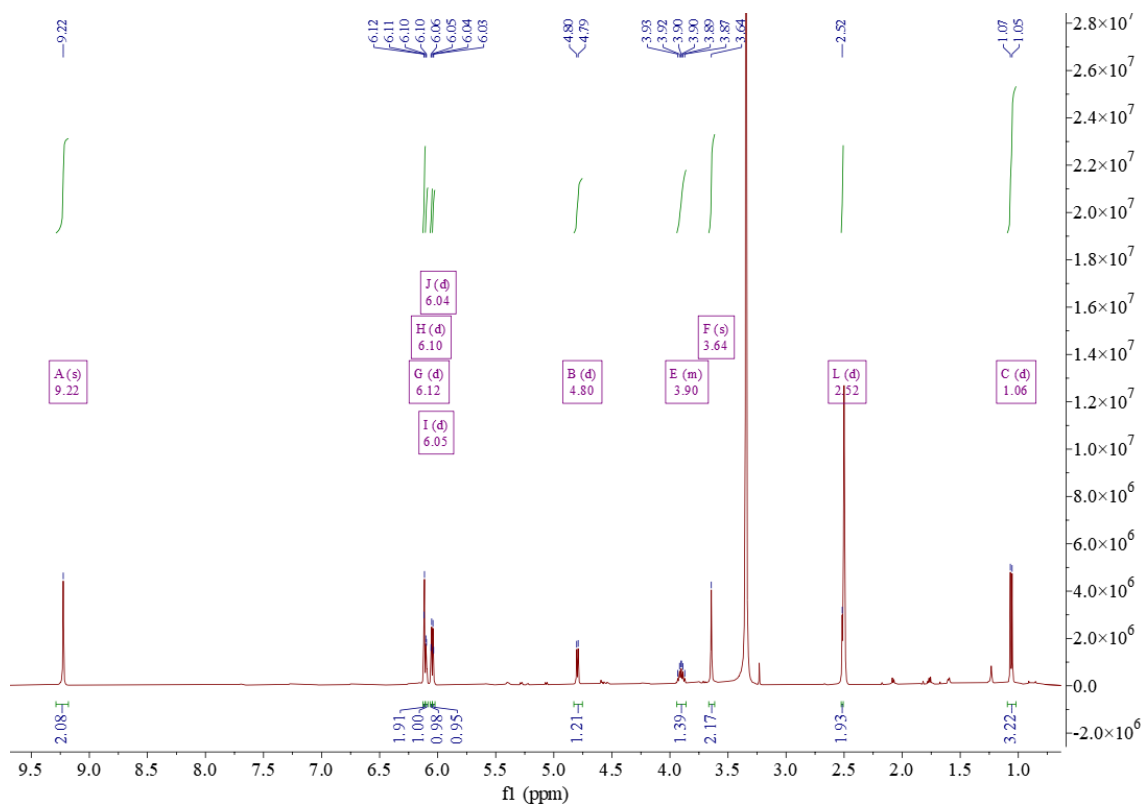

Figure S24. <sup>1</sup>H NMR spectrum of 5 in DMSO-*d*<sub>6</sub>.

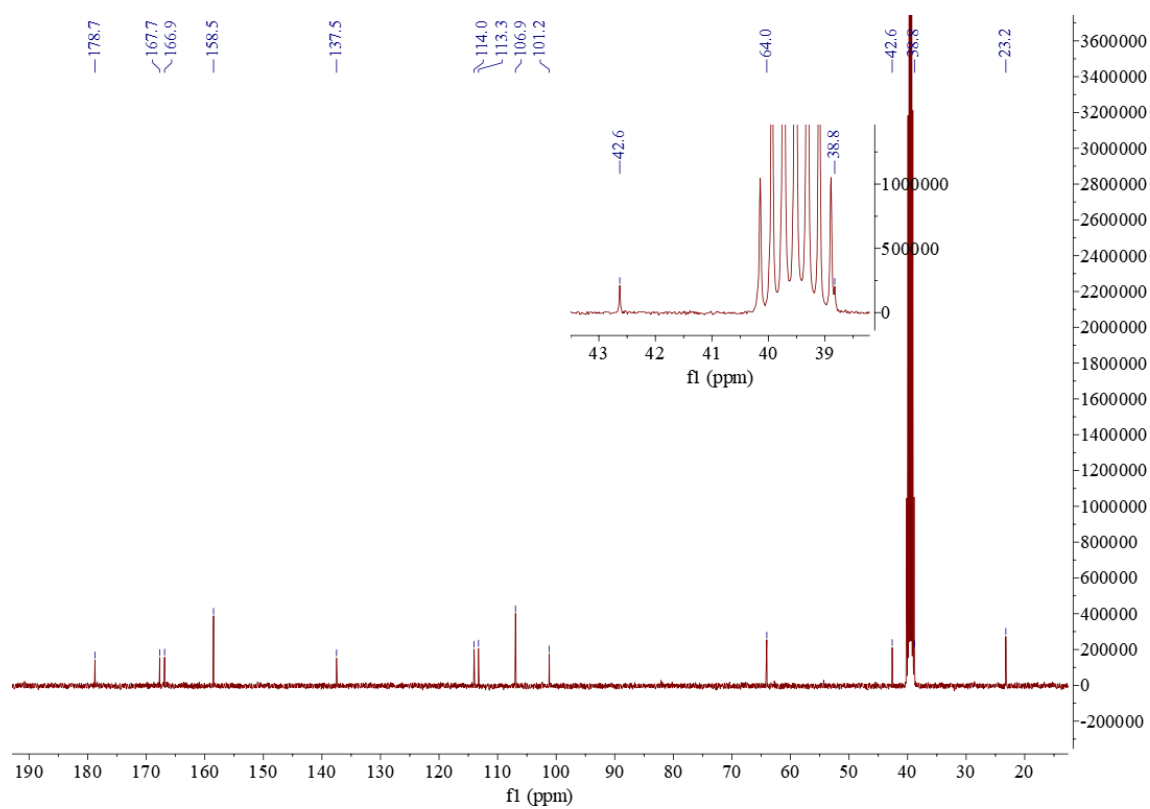

Figure S25. <sup>13</sup>C NMR spectrum of 5 in DMSO-*d*<sub>6</sub>.

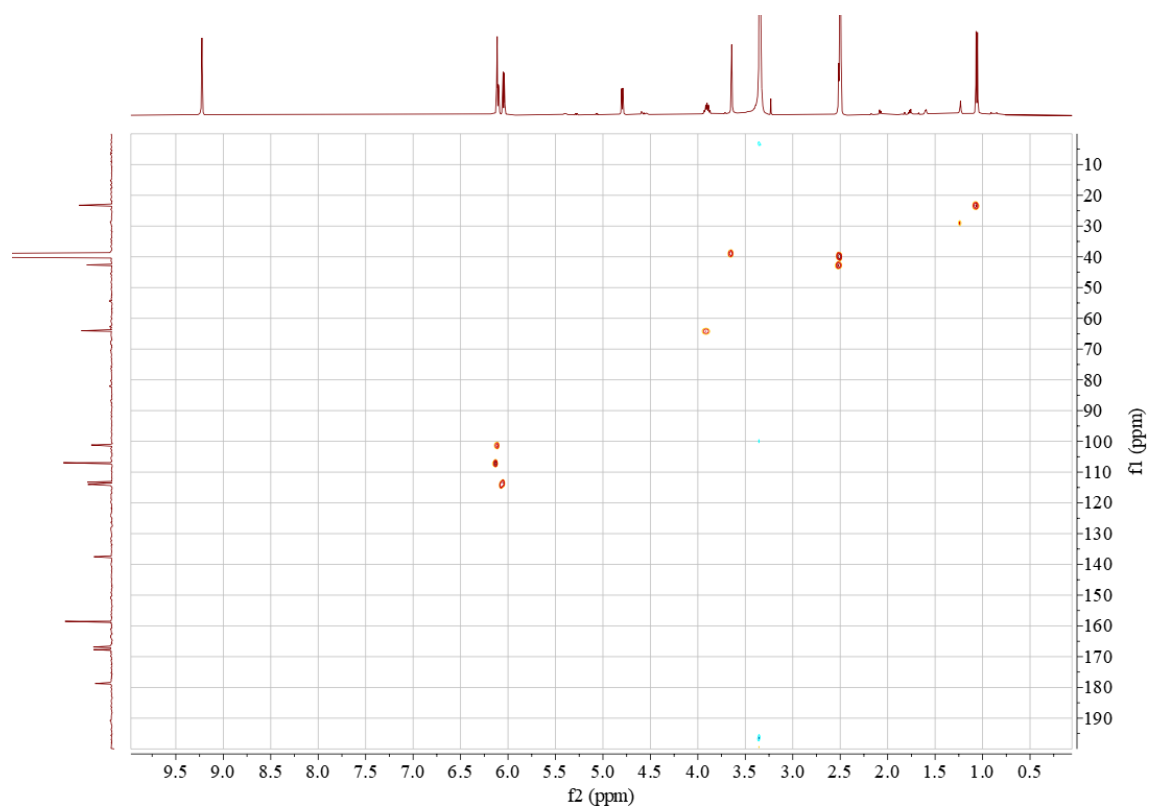

Figure S26. HSQC spectrum of 5.



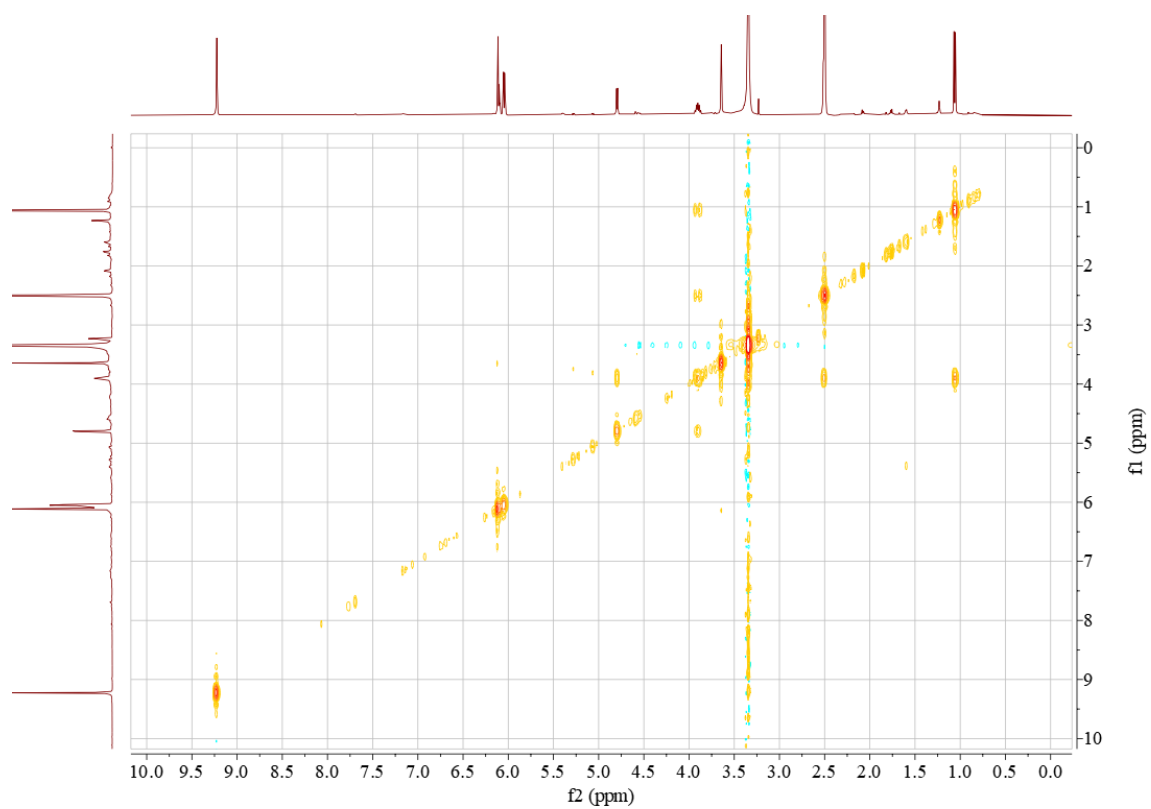

**Figure S27.**  $^1\text{H}$ - $^1\text{H}$  COSY spectrum of **5**.

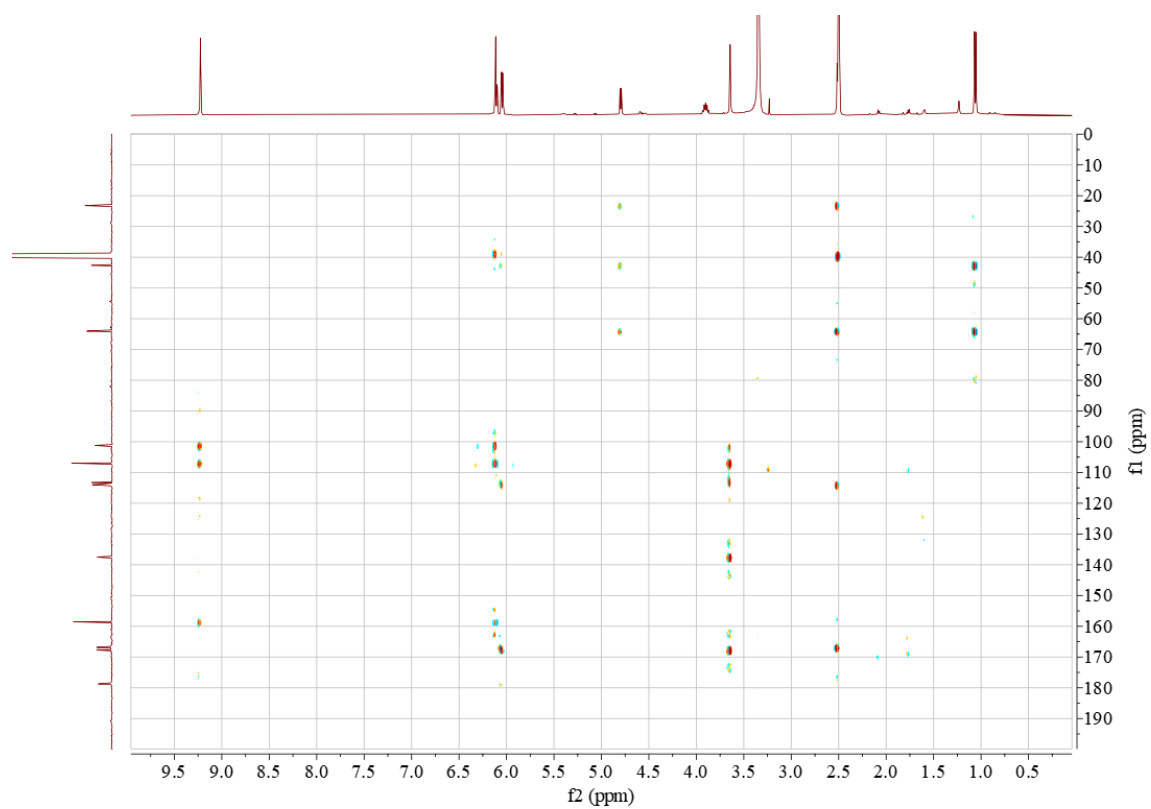

**Figure S28.** HMBC spectrum of **5**.

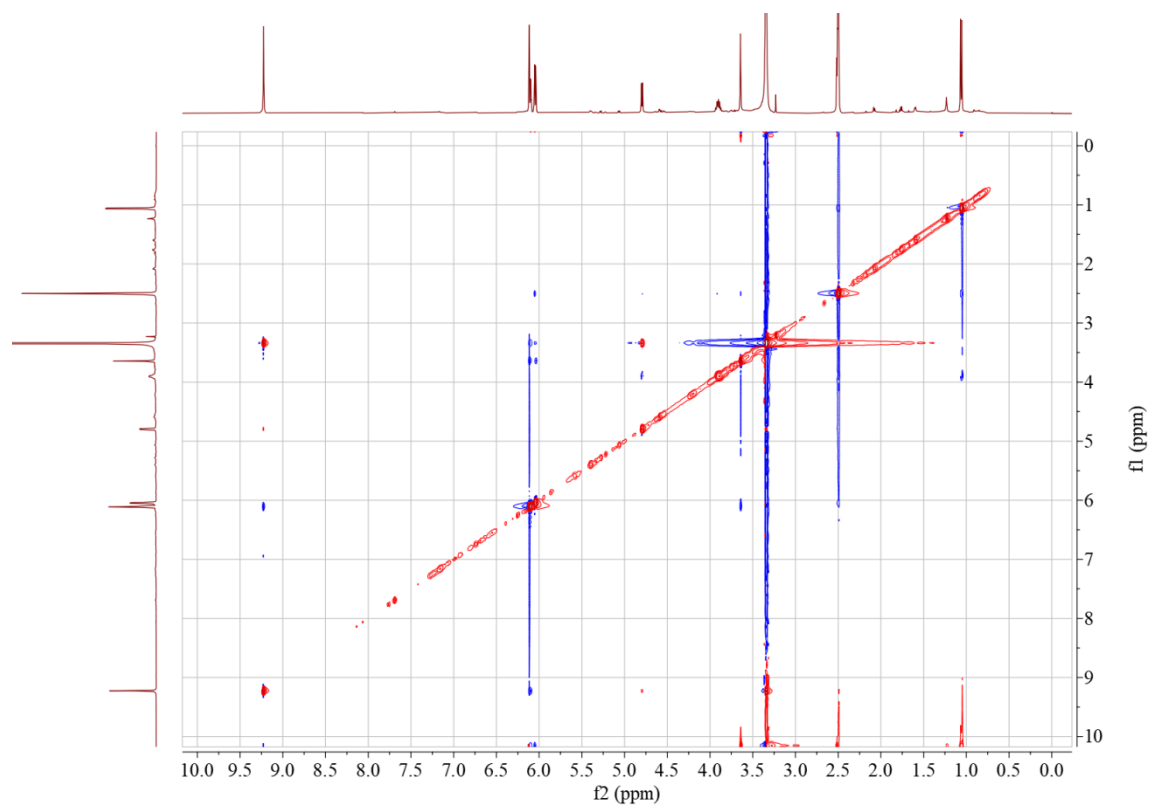

**Figure S29.** NOESY spectrum of **5**.

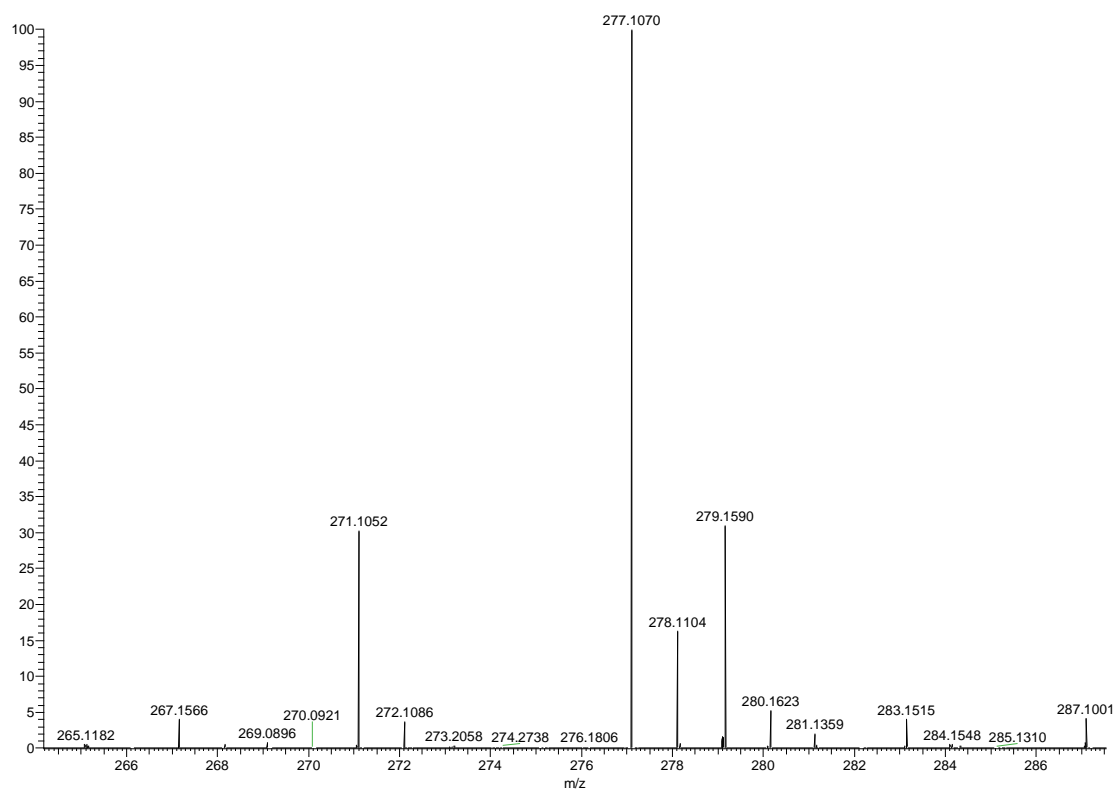

**Figure S30.** HR-ESI-MS spectrum of **5**.

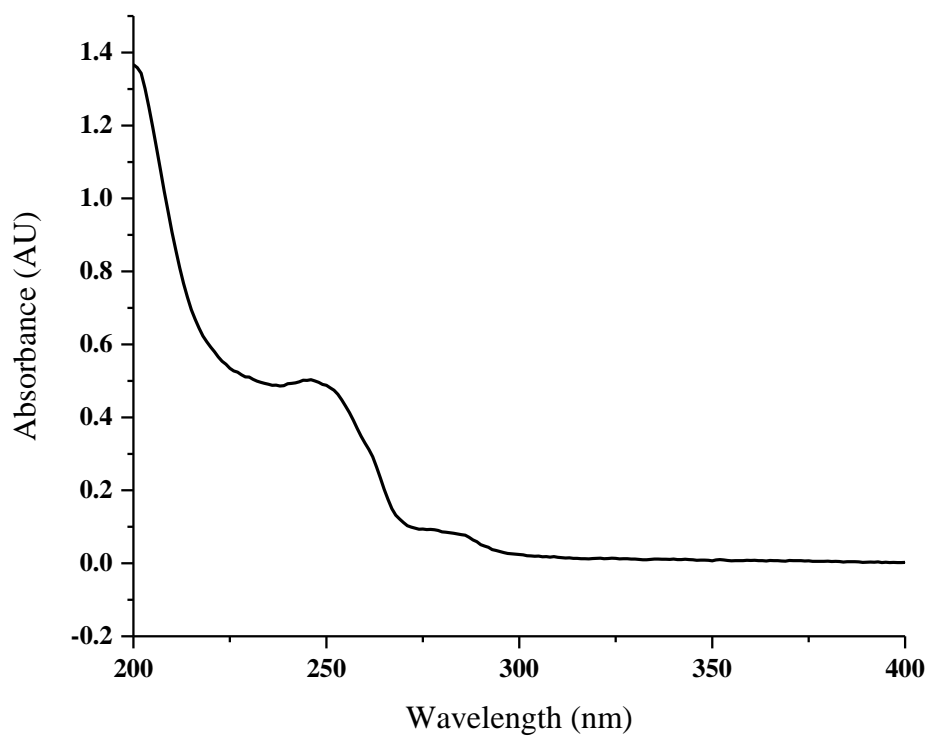

Figure S31. UV-vis spectrum of 5.

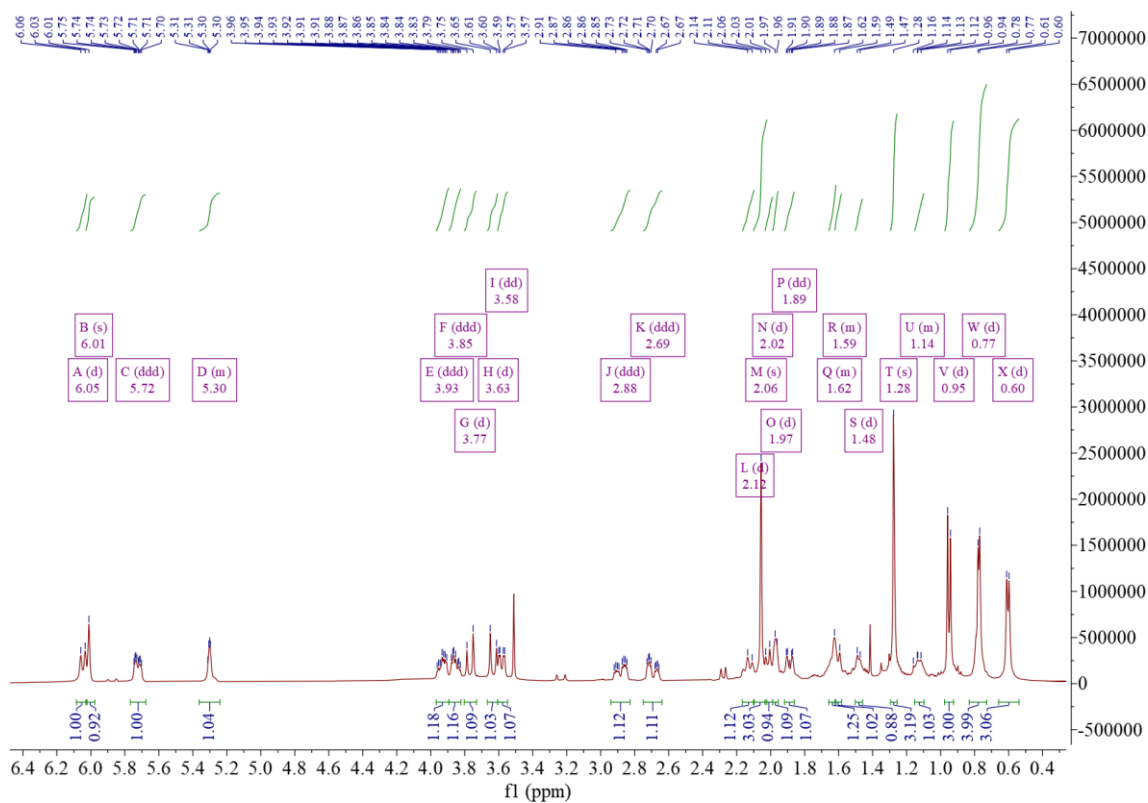

Figure S32.  $^1\text{H}$  NMR spectrum of 6 in  $\text{CDCl}_3$ .

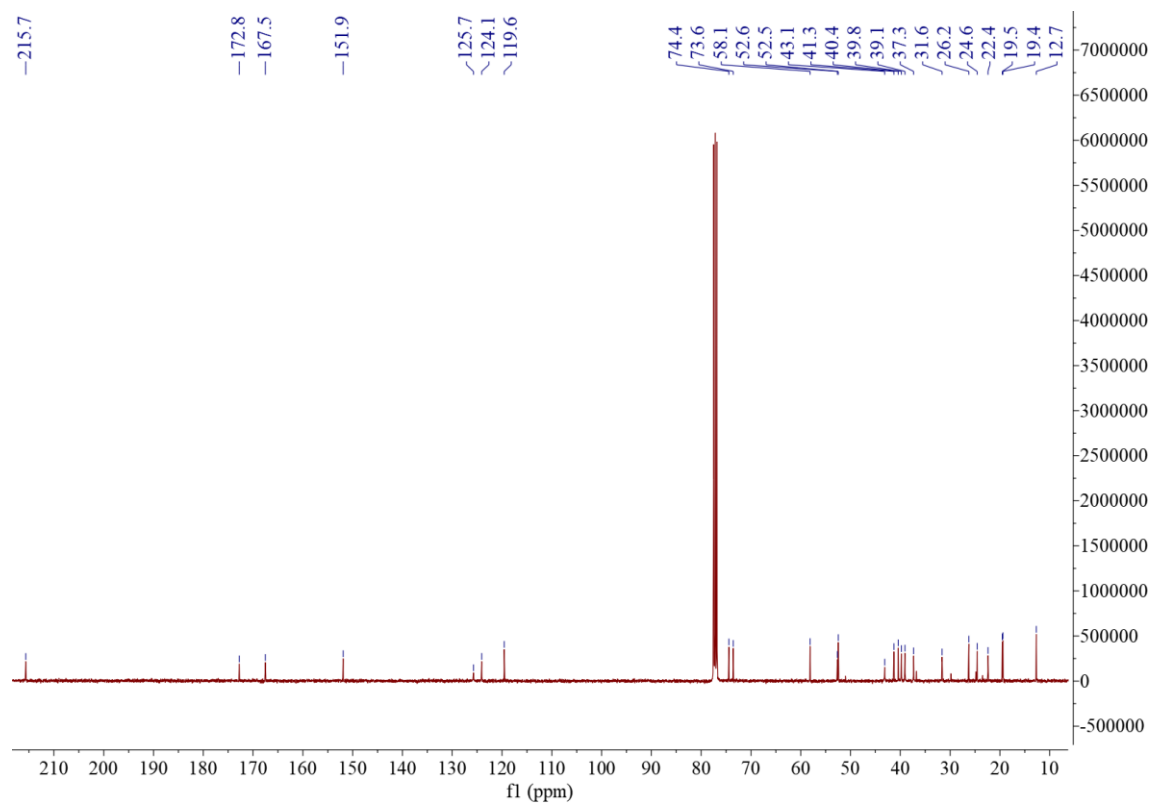

**Figure S33.**  $^{13}\text{C}$  NMR spectrum of **6** in  $\text{CDCl}_3$ .

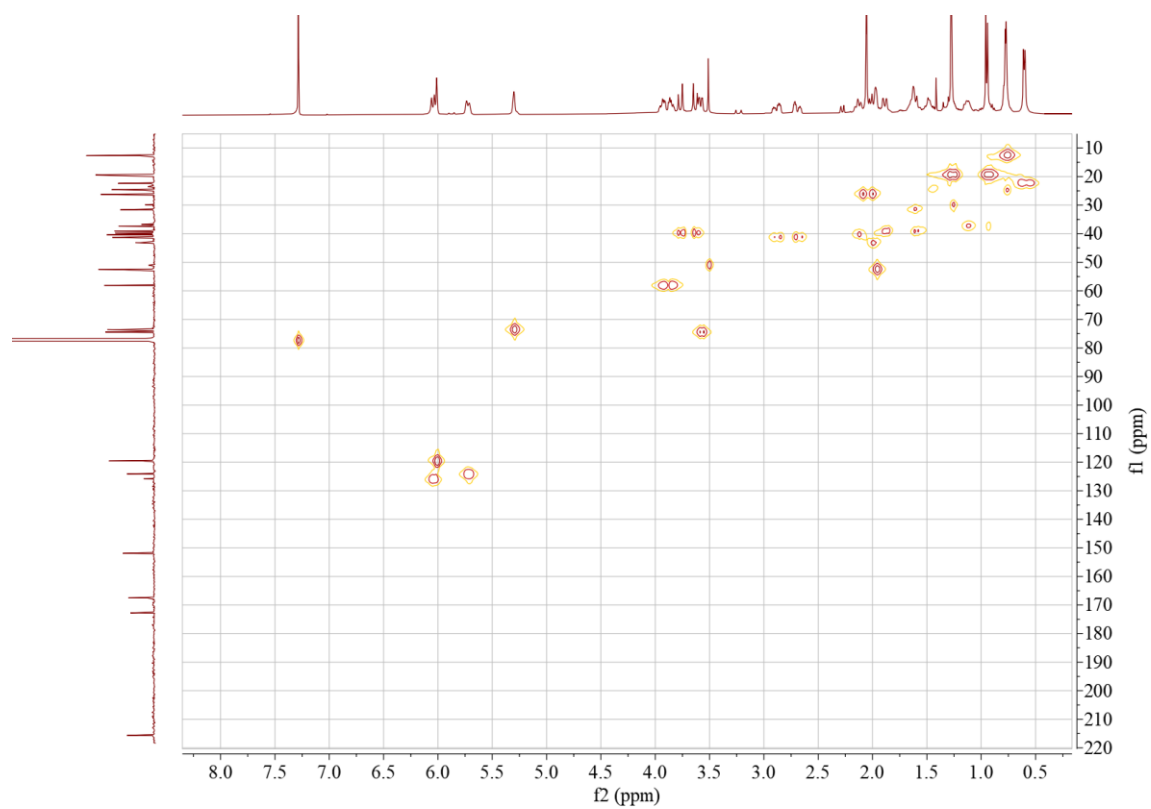

**Figure S34.** HSQC spectrum of **6**.

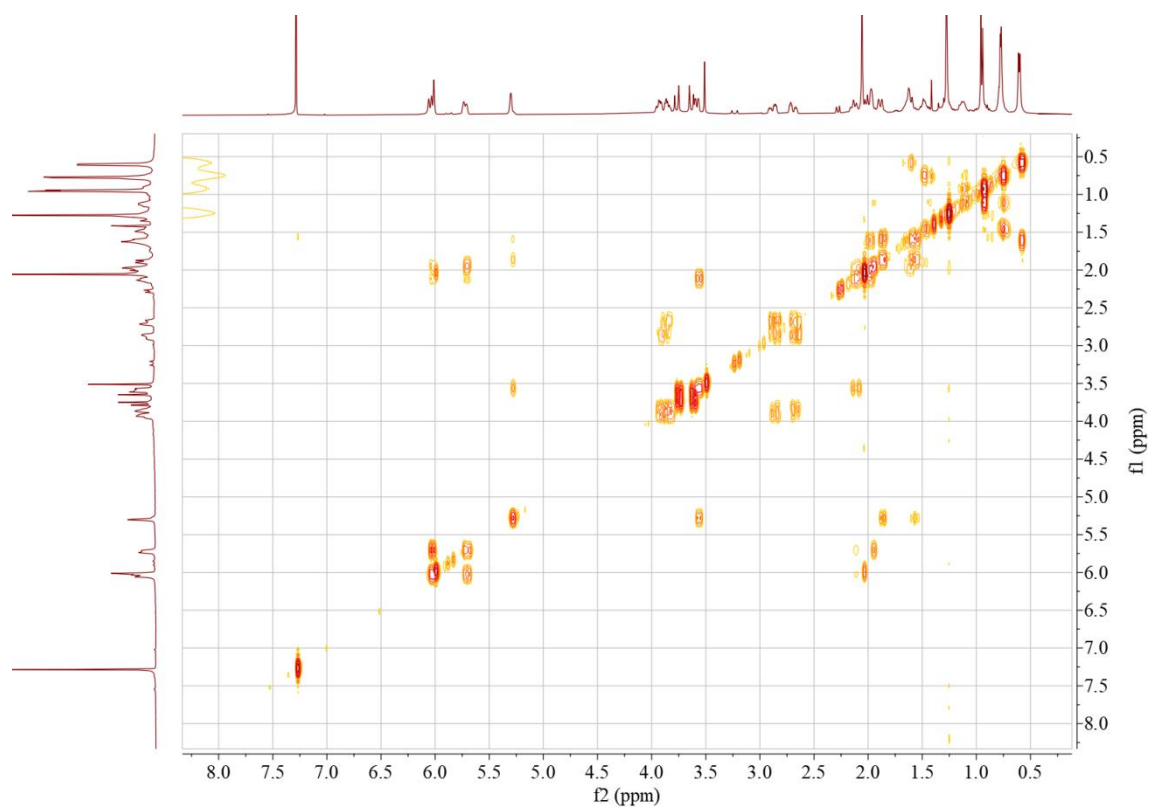

**Figure S35.**  $^1\text{H}$ - $^1\text{H}$  COSY spectrum of **6**.

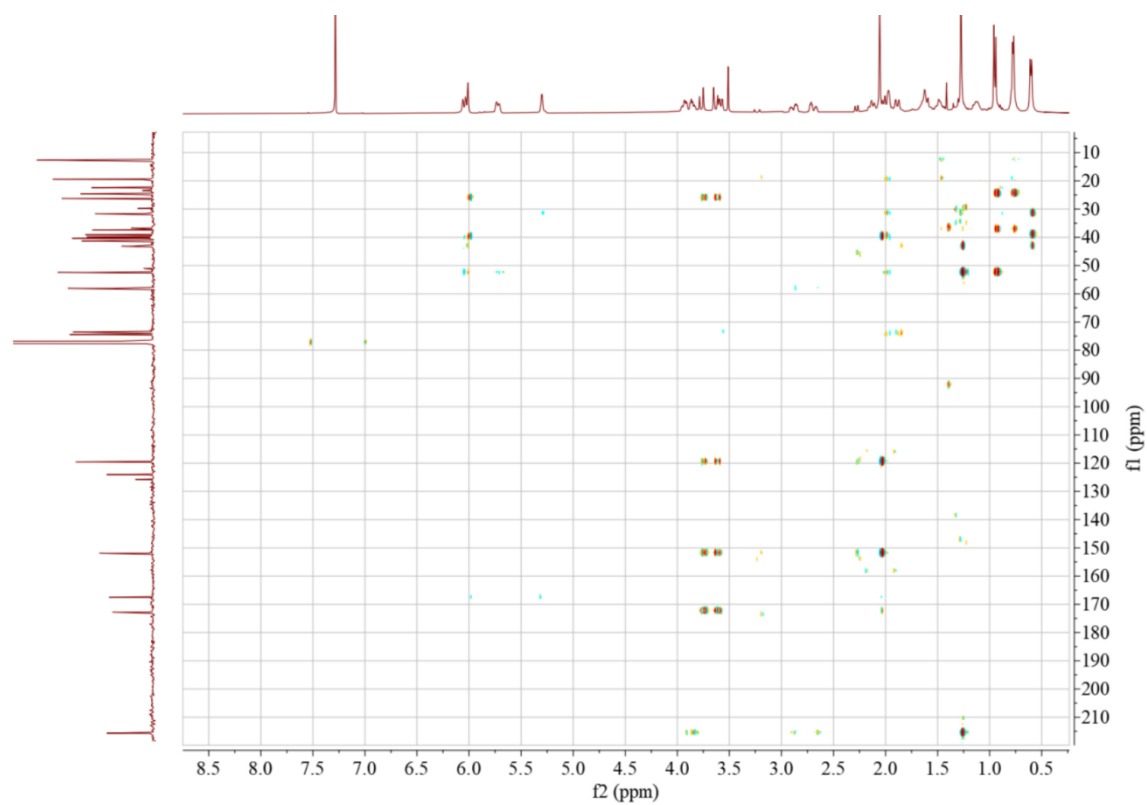

**Figure S36.** HMBC spectrum of **6**.

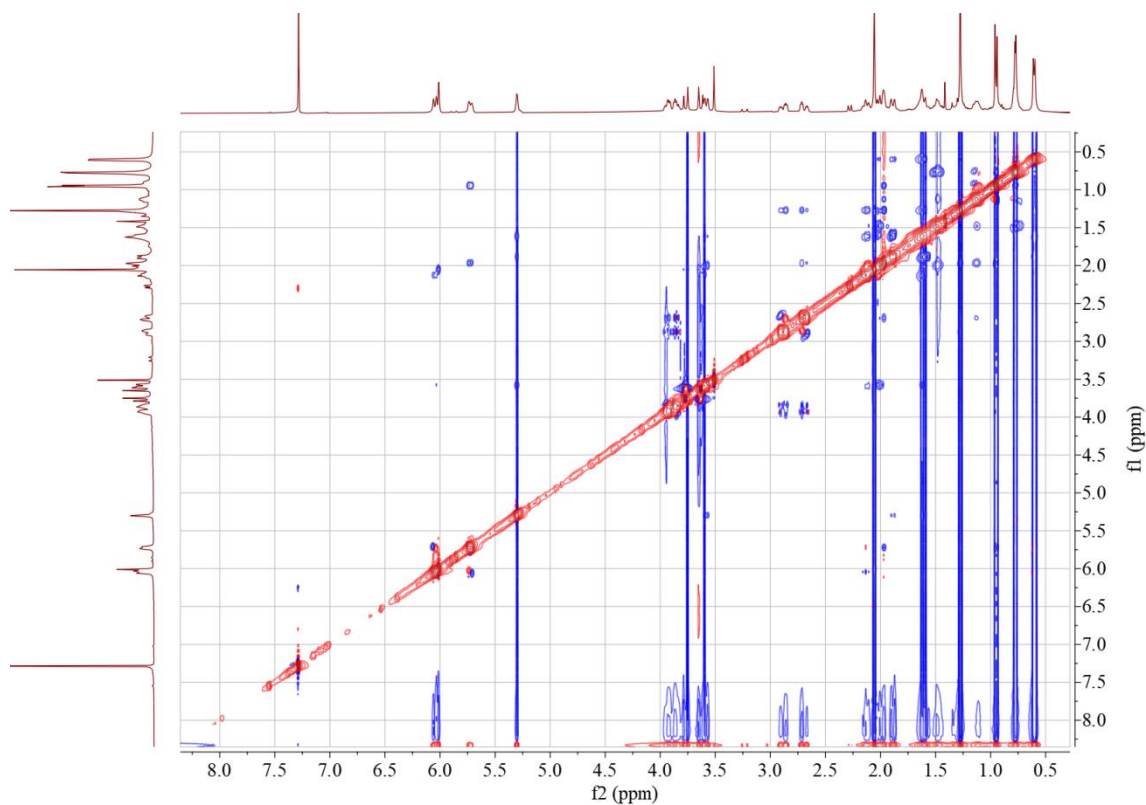

Figure S37. NOESY spectrum of 6.

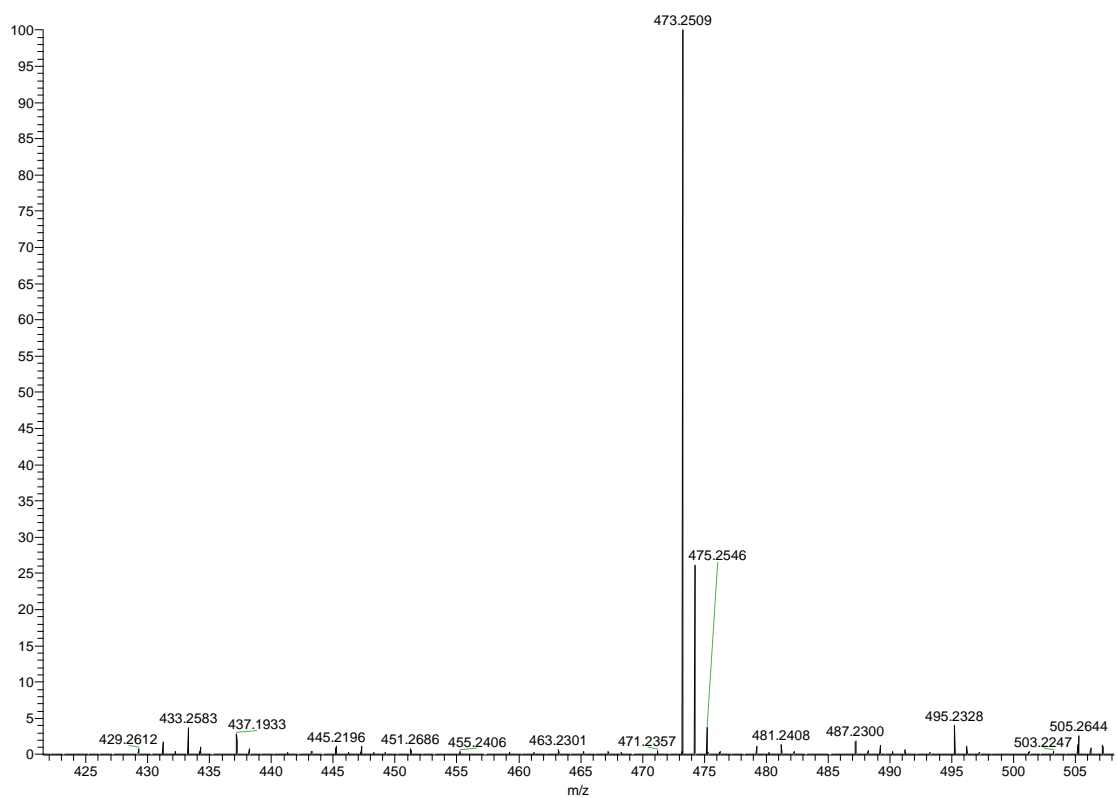

Figure S38. HR-ESI-MS spectrum of 6.

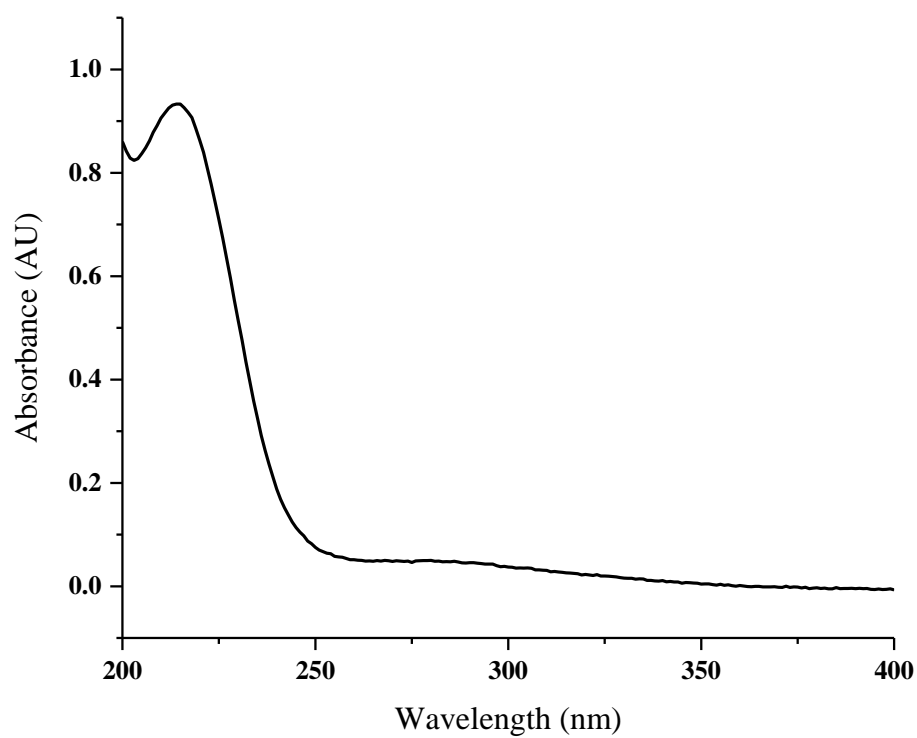

Figure S39. UV-vis spectrum of 6.

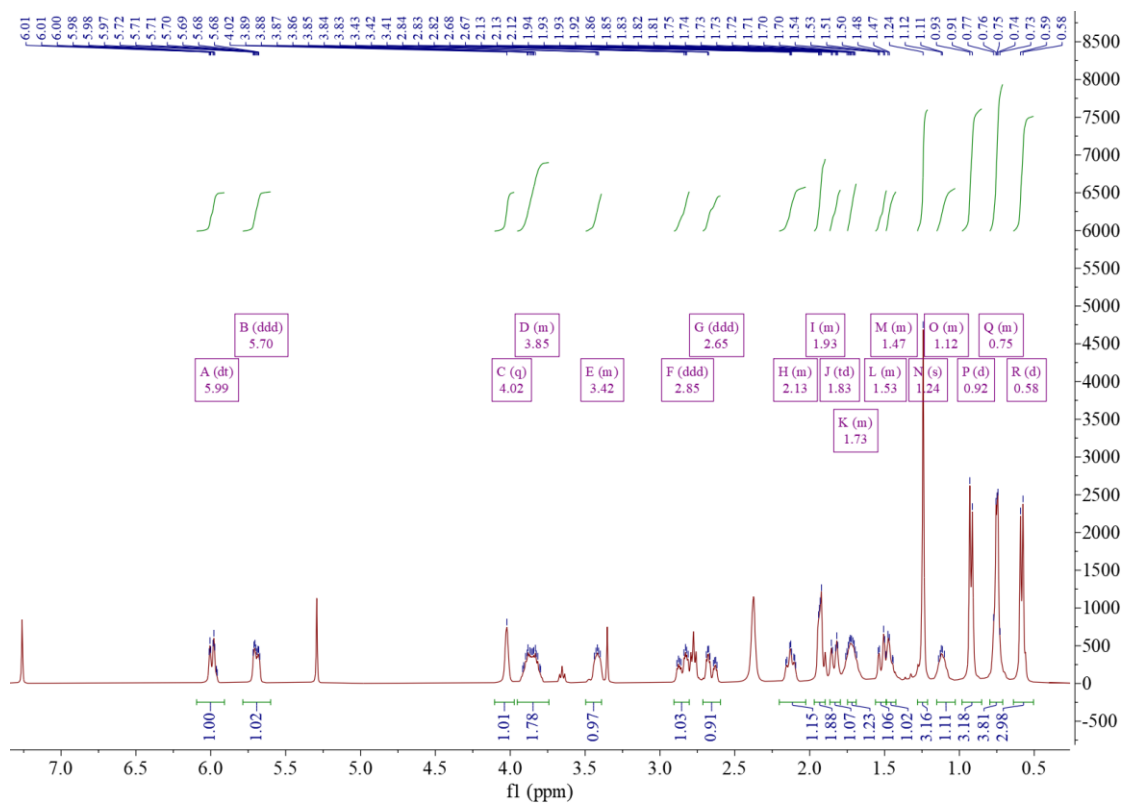

Figure S40. <sup>1</sup>H NMR spectrum of eujavanicol A in CDCl<sub>3</sub>.

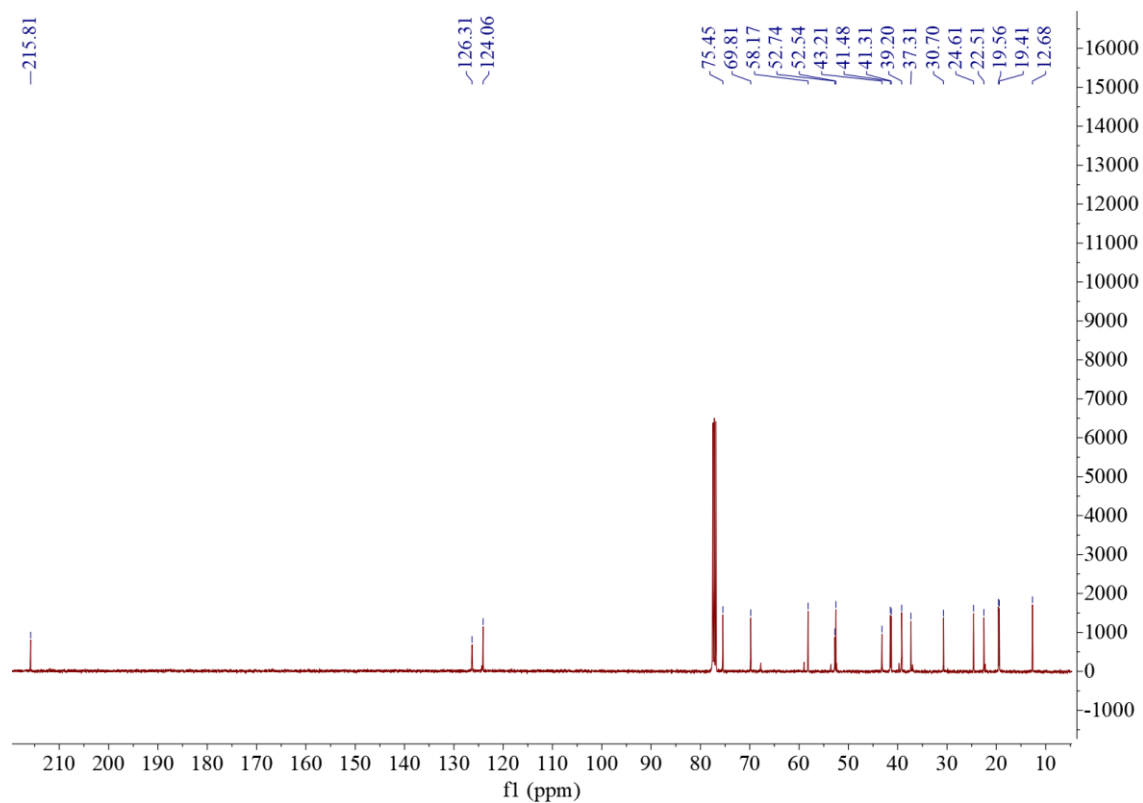

**Figure S41.** <sup>13</sup>C NMR spectrum of eujavanicol A in CDCl<sub>3</sub>.

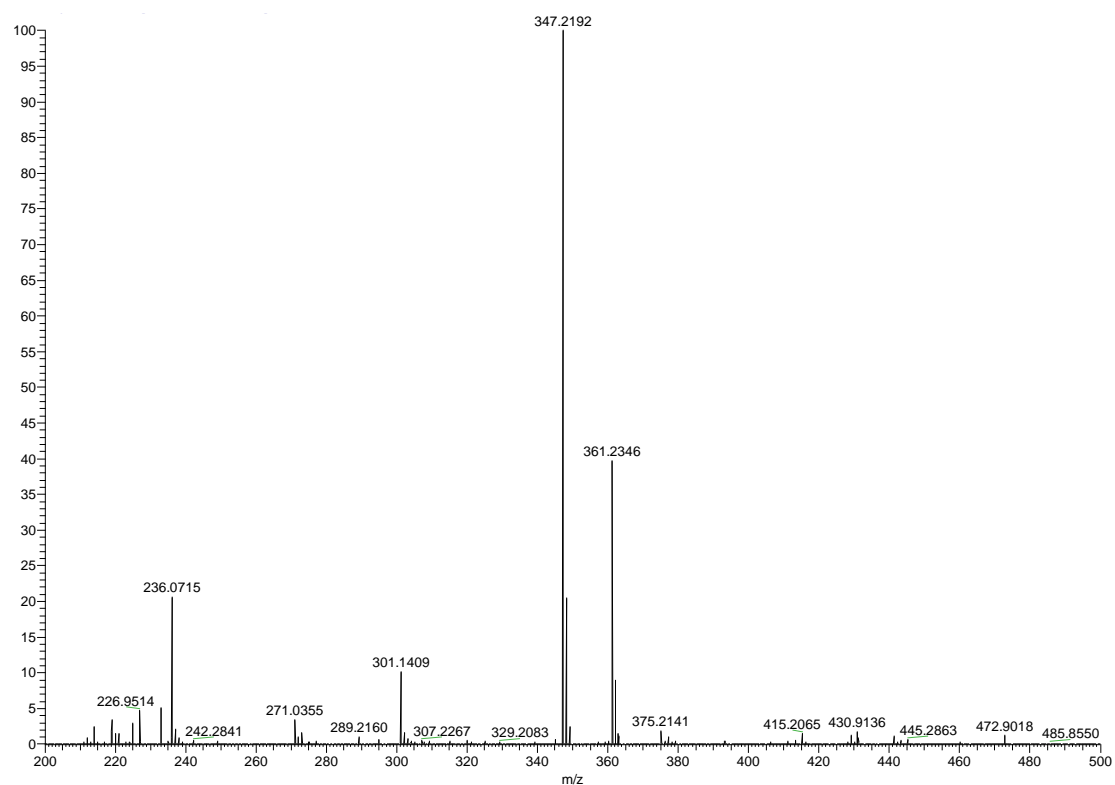

**Figure S42.** HR-ESI-MS spectrum of eujavanicol A.



**Table S1.** Gibbs free energy and Boltzmann population of low energy conformers of (3'*R*, 5'*S*)-1 in MeOH.

| Conformers | $\Delta G$ (kcal/mol) | P     |
|------------|-----------------------|-------|
| 1A         | 0.00                  | 30.8% |
| 1B         | 0.05                  | 28.5% |
| 1C         | 0.32                  | 18.1% |
| 1D         | 0.88                  | 7.0%  |
| 1E         | 0.90                  | 6.8%  |
| 1F         | 1.17                  | 4.3%  |
| 1G         | 1.26                  | 3.6%  |

**Table S2.** Gibbs free energy and Boltzmann population of low energy conformers of (3'*R*, 5'*R*)-1 in MeOH.

| Conformers | $\Delta G$ (kcal/mol) | P     |
|------------|-----------------------|-------|
| 1AA        | 0.00                  | 78.4% |
| 1BB        | 0.77                  | 21.3% |

**Table S3.** Gibbs free energy and Boltzmann population of low energy conformers of 14S-5 in MeOH.

| Conformers | $\Delta G$ (kcal/mol) | P     |
|------------|-----------------------|-------|
| 5A         | 0.00                  | 16.2% |
| 5B         | 0.02                  | 15.8% |
| 5C         | 0.28                  | 10.2% |
| 5D         | 0.38                  | 8.6%  |
| 5E         | 0.40                  | 8.3%  |
| 5F         | 0.66                  | 5.4%  |
| 5G         | 0.66                  | 5.4%  |
| 5H         | 0.71                  | 4.9%  |
| 5I         | 0.79                  | 4.3%  |
| 5J         | 0.84                  | 3.9%  |
| 5K         | 1.13                  | 2.4%  |
| 5L         | 1.16                  | 2.3%  |
| 5M         | 1.19                  | 2.2%  |
| 5N         | 1.43                  | 1.4%  |
| 5O         | 1.54                  | 1.2%  |
| 5P         | 1.64                  | 1.0%  |
| 5Q         | 1.66                  | 1.0%  |

**Table S4.** Cartesian coordinates for the low-energy optimized conformers of (3'R, 5'S)-1 at B3LYP/6 – 31+g (d,p) level of theory in MeOH.

1A:

| Center<br>Number | Atomic<br>Number | Atomic<br>Type | Coordinates (Angstroms) |           |           |
|------------------|------------------|----------------|-------------------------|-----------|-----------|
|                  |                  |                | X                       | Y         | Z         |
| 1                | 6                | 0              | 1.678966                | -0.886286 | -0.013639 |
| 2                | 6                | 0              | 1.464588                | 0.490108  | -0.201055 |
| 3                | 6                | 0              | 0.127269                | 0.985305  | -0.416828 |
| 4                | 6                | 0              | -0.953858               | 0.004945  | -0.426216 |
| 5                | 6                | 0              | -0.662173               | -1.317916 | -0.242149 |
| 6                | 8                | 0              | 0.615528                | -1.747004 | -0.042240 |
| 7                | 6                | 0              | -2.318944               | 0.620143  | -0.670225 |
| 8                | 6                | 0              | -1.594212               | -2.493898 | -0.210231 |
| 9                | 6                | 0              | 2.935135                | -1.430110 | 0.200102  |
| 10               | 6                | 0              | 4.033969                | -0.555005 | 0.227393  |
| 11               | 6                | 0              | 3.873630                | 0.830450  | 0.044582  |
| 12               | 6                | 0              | 2.597724                | 1.348094  | -0.168040 |
| 13               | 8                | 0              | 5.234983                | -1.144992 | 0.439440  |
| 14               | 6                | 0              | 6.418847                | -0.334998 | 0.480167  |
| 15               | 8                | 0              | 2.440659                | 2.675523  | -0.342956 |
| 16               | 8                | 0              | -0.100606               | 2.217016  | -0.587396 |
| 17               | 8                | 0              | -3.311702               | -0.352444 | -1.119149 |
| 18               | 6                | 0              | -4.316757               | -0.487893 | -0.228867 |
| 19               | 6                | 0              | -4.008286               | 0.316694  | 1.036470  |
| 20               | 6                | 0              | -2.964019               | 1.318714  | 0.557056  |
| 21               | 8                | 0              | -5.293059               | -1.171788 | -0.447297 |
| 22               | 8                | 0              | -5.151660               | 0.962777  | 1.561540  |
| 23               | 1                | 0              | -2.211037               | 1.327493  | -1.493297 |
| 24               | 1                | 0              | -1.006312               | -3.411818 | -0.172356 |
| 25               | 1                | 0              | -2.232566               | -2.465214 | 0.678872  |
| 26               | 1                | 0              | -2.238971               | -2.514601 | -1.089019 |
| 27               | 1                | 0              | 3.071145                | -2.495243 | 0.341028  |
| 28               | 1                | 0              | 4.712697                | 1.512999  | 0.063729  |
| 29               | 1                | 0              | 7.239069                | -1.029494 | 0.657733  |
| 30               | 1                | 0              | 6.572455                | 0.180876  | -0.472787 |
| 31               | 1                | 0              | 6.367981                | 0.391544  | 1.297119  |
| 32               | 1                | 0              | 1.462890                | 2.826182  | -0.475695 |
| 33               | 1                | 0              | -3.585210               | -0.383007 | 1.772229  |
| 34               | 1                | 0              | -3.473140               | 2.232860  | 0.237913  |
| 35               | 1                | 0              | -2.229082               | 1.576071  | 1.319048  |
| 36               | 1                | 0              | -5.794354               | 0.288576  | 1.828824  |

1B:

| Center<br>Number | Atomic<br>Number | Atomic<br>Type | Coordinates (Angstroms) |           |           |
|------------------|------------------|----------------|-------------------------|-----------|-----------|
|                  |                  |                | X                       | Y         | Z         |
| 1                | 6                | 0              | 1.779026                | -0.878086 | 0.071474  |
| 2                | 6                | 0              | 1.486021                | 0.491817  | -0.052610 |
| 3                | 6                | 0              | 0.112962                | 0.939479  | -0.088453 |
| 4                | 6                | 0              | -0.919982               | -0.091170 | 0.015700  |
| 5                | 6                | 0              | -0.546993               | -1.400566 | 0.142290  |
| 6                | 8                | 0              | 0.755741                | -1.785094 | 0.159983  |
| 7                | 6                | 0              | -2.344767               | 0.397909  | -0.014029 |
| 8                | 6                | 0              | -1.419267               | -2.607152 | 0.273023  |
| 9                | 6                | 0              | 3.071459                | -1.372582 | 0.110585  |
| 10               | 6                | 0              | 4.130535                | -0.452732 | 0.022378  |
| 11               | 6                | 0              | 3.893594                | 0.927334  | -0.101845 |
| 12               | 6                | 0              | 2.581048                | 1.395025  | -0.139325 |
| 13               | 8                | 0              | 5.370139                | -0.996727 | 0.066830  |
| 14               | 6                | 0              | 6.517630                | -0.138414 | -0.011637 |
| 15               | 8                | 0              | 2.354591                | 2.718009  | -0.258737 |
| 16               | 8                | 0              | -0.170793               | 2.165011  | -0.197247 |
| 17               | 8                | 0              | -3.147331               | -0.335931 | -1.010954 |
| 18               | 6                | 0              | -4.437716               | -0.408470 | -0.621336 |
| 19               | 6                | 0              | -4.607665               | 0.232516  | 0.768684  |
| 20               | 6                | 0              | -3.174491               | 0.299550  | 1.280448  |
| 21               | 8                | 0              | -5.301856               | -0.890393 | -1.323862 |
| 22               | 8                | 0              | -5.119253               | 1.557343  | 0.607944  |
| 23               | 1                | 0              | -2.315528               | 1.433139  | -0.356902 |
| 24               | 1                | 0              | -1.244835               | -3.080874 | 1.245254  |
| 25               | 1                | 0              | -2.474328               | -2.371343 | 0.173788  |
| 26               | 1                | 0              | -1.150843               | -3.334290 | -0.500129 |
| 27               | 1                | 0              | 3.265357                | -2.433681 | 0.207056  |
| 28               | 1                | 0              | 4.700517                | 1.644805  | -0.169291 |
| 29               | 1                | 0              | 7.379925                | -0.801412 | 0.046979  |
| 30               | 1                | 0              | 6.534839                | 0.405627  | -0.961155 |
| 31               | 1                | 0              | 6.536387                | 0.566068  | 0.825762  |
| 32               | 1                | 0              | 1.362482                | 2.831140  | -0.265508 |
| 33               | 1                | 0              | -5.272070               | -0.373838 | 1.391064  |
| 34               | 1                | 0              | -3.008889               | 1.156357  | 1.936497  |
| 35               | 1                | 0              | -2.932193               | -0.611502 | 1.834028  |
| 36               | 1                | 0              | -6.039087               | 1.505326  | 0.308834  |

1C:

| Center<br>Number | Atomic<br>Number | Atomic<br>Type | Coordinates (Angstroms) |           |           |
|------------------|------------------|----------------|-------------------------|-----------|-----------|
|                  |                  |                | X                       | Y         | Z         |
| 1                | 6                | 0              | -1.835070               | 1.015213  | 0.005598  |
| 2                | 6                | 0              | -1.172253               | -0.225047 | -0.031954 |
| 3                | 6                | 0              | 0.271680                | -0.274717 | -0.051064 |
| 4                | 6                | 0              | 0.970234                | 1.002115  | -0.030979 |
| 5                | 6                | 0              | 0.250589                | 2.164434  | 0.022684  |
| 6                | 8                | 0              | -1.105467               | 2.176548  | 0.032351  |
| 7                | 6                | 0              | 2.476406                | 1.025807  | -0.071310 |
| 8                | 6                | 0              | 0.789067                | 3.564043  | 0.054059  |
| 9                | 6                | 0              | -3.214317               | 1.132570  | 0.022328  |
| 10               | 6                | 0              | -3.975271               | -0.048937 | 0.001079  |
| 11               | 6                | 0              | -3.363171               | -1.314172 | -0.036549 |
| 12               | 6                | 0              | -1.972231               | -1.400183 | -0.052833 |
| 13               | 8                | 0              | -5.317572               | 0.130770  | 0.020395  |
| 14               | 6                | 0              | -6.179899               | -1.016385 | 0.006917  |
| 15               | 8                | 0              | -1.384962               | -2.612802 | -0.089466 |
| 16               | 8                | 0              | 0.891417                | -1.374861 | -0.083088 |
| 17               | 8                | 0              | 3.007303                | 0.375012  | 1.137631  |
| 18               | 6                | 0              | 3.740325                | -0.713314 | 0.843372  |
| 19               | 6                | 0              | 3.796134                | -0.950516 | -0.669523 |
| 20               | 6                | 0              | 3.155238                | 0.299894  | -1.265312 |
| 21               | 8                | 0              | 4.288929                | -1.376920 | 1.700190  |
| 22               | 8                | 0              | 5.140476                | -1.092102 | -1.116656 |
| 23               | 1                | 0              | 2.826902                | 2.053816  | -0.010282 |
| 24               | 1                | 0              | -0.013869               | 4.254773  | 0.314726  |
| 25               | 1                | 0              | 1.591814                | 3.668100  | 0.787367  |
| 26               | 1                | 0              | 1.184835                | 3.850774  | -0.926119 |
| 27               | 1                | 0              | -3.696490               | 2.101800  | 0.053128  |
| 28               | 1                | 0              | -3.938410               | -2.230375 | -0.052755 |
| 29               | 1                | 0              | -7.193253               | -0.617444 | 0.029047  |
| 30               | 1                | 0              | -6.034335               | -1.603607 | -0.905037 |
| 31               | 1                | 0              | -6.010435               | -1.642445 | 0.888414  |
| 32               | 1                | 0              | -0.400629               | -2.447251 | -0.094897 |
| 33               | 1                | 0              | 3.214180                | -1.851167 | -0.886031 |
| 34               | 1                | 0              | 3.940268                | 0.936367  | -1.681752 |
| 35               | 1                | 0              | 2.442518                | 0.069148  | -2.057185 |
| 36               | 1                | 0              | 5.501153                | -1.912461 | -0.748565 |

1D:

| Center<br>Number | Atomic<br>Number | Atomic<br>Type | Coordinates (Angstroms) |           |           |
|------------------|------------------|----------------|-------------------------|-----------|-----------|
|                  |                  |                | X                       | Y         | Z         |
| 1                | 6                | 0              | 1.773359                | -0.646989 | -0.068860 |
| 2                | 6                | 0              | 1.456777                | 0.710819  | -0.202031 |
| 3                | 6                | 0              | 0.086144                | 1.109326  | -0.411299 |
| 4                | 6                | 0              | -0.917466               | 0.050407  | -0.464254 |
| 5                | 6                | 0              | -0.523844               | -1.253198 | -0.342696 |
| 6                | 8                | 0              | 0.784165                | -1.585841 | -0.149703 |
| 7                | 6                | 0              | -2.324951               | 0.575537  | -0.681053 |
| 8                | 6                | 0              | -1.353328               | -2.502983 | -0.373474 |
| 9                | 6                | 0              | 3.069267                | -1.113181 | 0.140791  |
| 10               | 6                | 0              | 4.091758                | -0.157964 | 0.218846  |
| 11               | 6                | 0              | 3.823883                | 1.220153  | 0.087283  |
| 12               | 6                | 0              | 2.524488                | 1.654523  | -0.121497 |
| 13               | 8                | 0              | 5.393869                | -0.470681 | 0.422262  |
| 14               | 6                | 0              | 5.765336                | -1.847997 | 0.575657  |
| 15               | 8                | 0              | 2.264248                | 2.972797  | -0.247477 |
| 16               | 8                | 0              | -0.234663               | 2.325116  | -0.540122 |
| 17               | 8                | 0              | -3.263382               | -0.455437 | -1.112141 |
| 18               | 6                | 0              | -4.230180               | -0.668360 | -0.194258 |
| 19               | 6                | 0              | -3.949340               | 0.155730  | 1.065004  |
| 20               | 6                | 0              | -2.984960               | 1.225405  | 0.564840  |
| 21               | 8                | 0              | -5.158551               | -1.422031 | -0.390592 |
| 22               | 8                | 0              | -5.123335               | 0.726993  | 1.610626  |
| 23               | 1                | 0              | -2.280974               | 1.291877  | -1.502524 |
| 24               | 1                | 0              | -0.694310               | -3.362480 | -0.505500 |
| 25               | 1                | 0              | -1.891782               | -2.635158 | 0.571474  |
| 26               | 1                | 0              | -2.083505               | -2.478857 | -1.180818 |
| 27               | 1                | 0              | 3.245355                | -2.175655 | 0.235207  |
| 28               | 1                | 0              | 4.637319                | 1.933705  | 0.151232  |
| 29               | 1                | 0              | 6.843572                | -1.843157 | 0.730211  |
| 30               | 1                | 0              | 5.269761                | -2.291070 | 1.445288  |
| 31               | 1                | 0              | 5.524595                | -2.420094 | -0.325931 |
| 32               | 1                | 0              | 1.280155                | 3.051741  | -0.387585 |
| 33               | 1                | 0              | -3.468357               | -0.512428 | 1.794117  |
| 34               | 1                | 0              | -3.560894               | 2.104668  | 0.261796  |
| 35               | 1                | 0              | -2.251068               | 1.528985  | 1.310287  |
| 36               | 1                | 0              | -5.710330               | 0.013222  | 1.901916  |

1E:

| Center<br>Number | Atomic<br>Number | Atomic<br>Type | Coordinates (Angstroms) |           |           |
|------------------|------------------|----------------|-------------------------|-----------|-----------|
|                  |                  |                | X                       | Y         | Z         |
| 1                | 6                | 0              | 1.866168                | -0.626660 | 0.046856  |
| 2                | 6                | 0              | 1.483029                | 0.717301  | -0.057331 |
| 3                | 6                | 0              | 0.081825                | 1.072337  | -0.074975 |
| 4                | 6                | 0              | -0.877833               | -0.027113 | 0.023733  |
| 5                | 6                | 0              | -0.415953               | -1.310337 | 0.121965  |
| 6                | 8                | 0              | 0.910313                | -1.602991 | 0.127387  |
| 7                | 6                | 0              | -2.333931               | 0.360087  | 0.018730  |
| 8                | 6                | 0              | -1.205161               | -2.574496 | 0.234300  |
| 9                | 6                | 0              | 3.193251                | -1.045961 | 0.071475  |
| 10               | 6                | 0              | 4.183041                | -0.056620 | -0.015217 |
| 11               | 6                | 0              | 3.849906                | 1.308274  | -0.123222 |
| 12               | 6                | 0              | 2.518882                | 1.695810  | -0.144616 |
| 13               | 8                | 0              | 5.510614                | -0.323153 | -0.002758 |
| 14               | 6                | 0              | 5.949214                | -1.684725 | 0.110114  |
| 15               | 8                | 0              | 2.200643                | 3.002702  | -0.248072 |
| 16               | 8                | 0              | -0.284404               | 2.276830  | -0.166139 |
| 17               | 8                | 0              | -3.079739               | -0.368204 | -1.026415 |
| 18               | 6                | 0              | -4.361253               | -0.560303 | -0.648850 |
| 19               | 6                | 0              | -4.579600               | -0.020298 | 0.776601  |
| 20               | 6                | 0              | -3.155705               | 0.120623  | 1.299648  |
| 21               | 8                | 0              | -5.186517               | -1.061474 | -1.383939 |
| 22               | 8                | 0              | -5.187098               | 1.270748  | 0.694044  |
| 23               | 1                | 0              | -2.378827               | 1.413611  | -0.260910 |
| 24               | 1                | 0              | -1.067884               | -3.008541 | 1.231125  |
| 25               | 1                | 0              | -2.264718               | -2.417159 | 0.055545  |
| 26               | 1                | 0              | -0.832176               | -3.300188 | -0.494863 |
| 27               | 1                | 0              | 3.417163                | -2.100437 | 0.154276  |
| 28               | 1                | 0              | 4.637512                | 2.050079  | -0.188432 |
| 29               | 1                | 0              | 7.037529                | -1.641832 | 0.096063  |
| 30               | 1                | 0              | 5.609550                | -2.126871 | 1.052006  |
| 31               | 1                | 0              | 5.592486                | -2.281024 | -0.735522 |
| 32               | 1                | 0              | 1.204260                | 3.048471  | -0.244012 |
| 33               | 1                | 0              | -5.198223               | -0.710811 | 1.357036  |
| 34               | 1                | 0              | -3.055257               | 0.944365  | 2.009077  |
| 35               | 1                | 0              | -2.847680               | -0.803089 | 1.795815  |
| 36               | 1                | 0              | -6.099497               | 1.170250  | 0.384661  |

1F:

| Center<br>Number | Atomic<br>Number | Atomic<br>Type | Coordinates (Angstroms) |           |           |
|------------------|------------------|----------------|-------------------------|-----------|-----------|
|                  |                  |                | X                       | Y         | Z         |
| 1                | 6                | 0              | -1.834740               | 1.015773  | 0.008457  |
| 2                | 6                | 0              | -1.164315               | -0.220003 | -0.034012 |
| 3                | 6                | 0              | 0.278725                | -0.258263 | -0.055135 |
| 4                | 6                | 0              | 0.975244                | 1.023802  | -0.033999 |
| 5                | 6                | 0              | 0.246932                | 2.180799  | 0.022599  |
| 6                | 8                | 0              | -1.111678               | 2.179261  | 0.036513  |
| 7                | 6                | 0              | 2.482424                | 1.027783  | -0.073398 |
| 8                | 6                | 0              | 0.734792                | 3.594961  | 0.055377  |
| 9                | 6                | 0              | -3.214605               | 1.123765  | 0.027479  |
| 10               | 6                | 0              | -3.967715               | -0.062858 | 0.002970  |
| 11               | 6                | 0              | -3.347664               | -1.324096 | -0.039715 |
| 12               | 6                | 0              | -1.956280               | -1.400768 | -0.057674 |
| 13               | 8                | 0              | -5.310972               | 0.108103  | 0.024153  |
| 14               | 6                | 0              | -6.166210               | -1.044318 | 0.005300  |
| 15               | 8                | 0              | -1.361220               | -2.609297 | -0.099004 |
| 16               | 8                | 0              | 0.905882                | -1.353550 | -0.090290 |
| 17               | 8                | 0              | 3.000459                | 0.369689  | 1.136588  |
| 18               | 6                | 0              | 3.726425                | -0.723837 | 0.844587  |
| 19               | 6                | 0              | 3.797936                | -0.954487 | -0.668792 |
| 20               | 6                | 0              | 3.150830                | 0.291497  | -1.267350 |
| 21               | 8                | 0              | 4.261601                | -1.395162 | 1.703942  |
| 22               | 8                | 0              | 5.149379                | -1.079130 | -1.101415 |
| 23               | 1                | 0              | 2.851346                | 2.047941  | -0.012520 |
| 24               | 1                | 0              | 1.808669                | 3.671968  | 0.208579  |
| 25               | 1                | 0              | 0.480860                | 4.092711  | -0.887089 |
| 26               | 1                | 0              | 0.225146                | 4.132695  | 0.860330  |
| 27               | 1                | 0              | -3.703326               | 2.089581  | 0.061889  |
| 28               | 1                | 0              | -3.916999               | -2.243920 | -0.058579 |
| 29               | 1                | 0              | -7.181997               | -0.651739 | 0.029305  |
| 30               | 1                | 0              | -6.016955               | -1.626239 | -0.909441 |
| 31               | 1                | 0              | -5.992829               | -1.673439 | 0.883830  |
| 32               | 1                | 0              | -0.378282               | -2.437642 | -0.104666 |
| 33               | 1                | 0              | 3.229764                | -1.861210 | -0.895589 |
| 34               | 1                | 0              | 3.930538                | 0.925439  | -1.697252 |
| 35               | 1                | 0              | 2.430793                | 0.053103  | -2.050173 |
| 36               | 1                | 0              | 5.514989                | -1.897051 | -0.732684 |

1G:

| Center<br>Number | Atomic<br>Number | Atomic<br>Type | Coordinates (Angstroms) |           |           |
|------------------|------------------|----------------|-------------------------|-----------|-----------|
|                  |                  |                | X                       | Y         | Z         |
| 1                | 6                | 0              | -1.914098               | 0.709211  | 0.003747  |
| 2                | 6                | 0              | -1.133864               | -0.454677 | -0.032568 |
| 3                | 6                | 0              | 0.306876                | -0.356340 | -0.050487 |
| 4                | 6                | 0              | 0.879135                | 0.985737  | -0.034979 |
| 5                | 6                | 0              | 0.045174                | 2.068894  | 0.018651  |
| 6                | 8                | 0              | -1.307178               | 1.935527  | 0.031731  |
| 7                | 6                | 0              | 2.379197                | 1.129706  | -0.081187 |
| 8                | 6                | 0              | 0.396554                | 3.523088  | 0.048768  |
| 9                | 6                | 0              | -3.305881               | 0.697416  | 0.017783  |
| 10               | 6                | 0              | -3.939580               | -0.553160 | -0.007033 |
| 11               | 6                | 0              | -3.199697               | -1.752081 | -0.043465 |
| 12               | 6                | 0              | -1.814266               | -1.709286 | -0.055630 |
| 13               | 8                | 0              | -5.284448               | -0.710106 | 0.001935  |
| 14               | 6                | 0              | -6.123510               | 0.453530  | 0.036574  |
| 15               | 8                | 0              | -1.105503               | -2.856902 | -0.091347 |
| 16               | 8                | 0              | 1.034817                | -1.387289 | -0.079540 |
| 17               | 8                | 0              | 2.960408                | 0.534371  | 1.132236  |
| 18               | 6                | 0              | 3.787717                | -0.486471 | 0.847027  |
| 19               | 6                | 0              | 3.875706                | -0.723967 | -0.664458 |
| 20               | 6                | 0              | 3.105304                | 0.445154  | -1.272227 |
| 21               | 8                | 0              | 4.388439                | -1.094739 | 1.709955  |
| 22               | 8                | 0              | 5.231467                | -0.717386 | -1.101714 |
| 23               | 1                | 0              | 2.653549                | 2.180169  | -0.033025 |
| 24               | 1                | 0              | -0.178374               | 4.015702  | 0.838275  |
| 25               | 1                | 0              | 1.455074                | 3.700469  | 0.224657  |
| 26               | 1                | 0              | 0.118577                | 3.989249  | -0.903050 |
| 27               | 1                | 0              | -3.847280               | 1.632792  | 0.047211  |
| 28               | 1                | 0              | -3.718989               | -2.703333 | -0.061680 |
| 29               | 1                | 0              | -7.145079               | 0.075604  | 0.036681  |
| 30               | 1                | 0              | -5.945137               | 1.035812  | 0.945987  |
| 31               | 1                | 0              | -5.960780               | 1.077740  | -0.847612 |
| 32               | 1                | 0              | -0.144275               | -2.593510 | -0.094220 |
| 33               | 1                | 0              | 3.400189                | -1.685330 | -0.879588 |
| 34               | 1                | 0              | 3.815400                | 1.145624  | -1.719150 |
| 35               | 1                | 0              | 2.404554                | 0.127095  | -2.044095 |
| 36               | 1                | 0              | 5.679959                | -1.486403 | -0.719546 |



**Table S5.** Cartesian coordinates for the low-energy optimized conformers of (3'R, 5'R)-1 at B3LYP/6 – 31+g (d,p) level of theory in MeOH.

1AA:

| Center<br>Number | Atomic<br>Number | Atomic<br>Type | Coordinates (Angstroms) |           |           |
|------------------|------------------|----------------|-------------------------|-----------|-----------|
|                  |                  |                | X                       | Y         | Z         |
| 1                | 6                | 0              | -1.754581               | -0.865357 | 0.023434  |
| 2                | 6                | 0              | -1.534006               | 0.522509  | -0.033590 |
| 3                | 6                | 0              | -0.186477               | 1.042177  | -0.066695 |
| 4                | 6                | 0              | 0.898739                | 0.061757  | -0.031864 |
| 5                | 6                | 0              | 0.595383                | -1.270609 | 0.022945  |
| 6                | 8                | 0              | -0.684819               | -1.722122 | 0.042620  |
| 7                | 6                | 0              | 2.296736                | 0.620374  | -0.052170 |
| 8                | 6                | 0              | 1.532499                | -2.434099 | 0.066216  |
| 9                | 6                | 0              | -3.019011               | -1.427494 | 0.060016  |
| 10               | 6                | 0              | -4.125181               | -0.560395 | 0.038437  |
| 11               | 6                | 0              | -3.961035               | 0.834408  | -0.019744 |
| 12               | 6                | 0              | -2.675029               | 1.370870  | -0.055490 |
| 13               | 8                | 0              | -5.334414               | -1.169015 | 0.077508  |
| 14               | 6                | 0              | -6.525487               | -0.368360 | 0.061995  |
| 15               | 8                | 0              | -2.519152               | 2.708155  | -0.110473 |
| 16               | 8                | 0              | 0.032810                | 2.284479  | -0.116229 |
| 17               | 8                | 0              | 3.096307                | 0.027304  | -1.147178 |
| 18               | 6                | 0              | 4.398320                | -0.015717 | -0.798504 |
| 19               | 6                | 0              | 4.580637                | 0.552167  | 0.614543  |
| 20               | 6                | 0              | 3.175556                | 0.438672  | 1.198044  |
| 21               | 8                | 0              | 5.260844                | -0.456575 | -1.528959 |
| 22               | 8                | 0              | 5.533491                | -0.163132 | 1.374122  |
| 23               | 1                | 0              | 2.206592                | 1.682485  | -0.287676 |
| 24               | 1                | 0              | 2.566677                | -2.140956 | -0.088141 |
| 25               | 1                | 0              | 1.442198                | -2.942687 | 1.032503  |
| 26               | 1                | 0              | 1.253445                | -3.152203 | -0.711129 |
| 27               | 1                | 0              | -3.156693               | -2.500788 | 0.103843  |
| 28               | 1                | 0              | -4.804284               | 1.511853  | -0.037463 |
| 29               | 1                | 0              | -7.351519               | -1.077382 | 0.100967  |
| 30               | 1                | 0              | -6.564349               | 0.291364  | 0.934468  |
| 31               | 1                | 0              | -6.588541               | 0.220657  | -0.858264 |
| 32               | 1                | 0              | -1.534775               | 2.873870  | -0.126863 |
| 33               | 1                | 0              | 4.873116                | 1.607902  | 0.505815  |
| 34               | 1                | 0              | 3.045932                | -0.553465 | 1.640932  |
| 35               | 1                | 0              | 2.952978                | 1.192280  | 1.955169  |
| 36               | 1                | 0              | 6.396304                | -0.091100 | 0.939111  |

1BB:

| Center<br>Number | Atomic<br>Number | Atomic<br>Type | Coordinates (Angstroms) |           |           |
|------------------|------------------|----------------|-------------------------|-----------|-----------|
|                  |                  |                | X                       | Y         | Z         |
| 1                | 6                | 0              | -1.843067               | -0.627053 | 0.007973  |
| 2                | 6                | 0              | -1.539092               | 0.740676  | -0.028857 |
| 3                | 6                | 0              | -0.161105               | 1.176378  | -0.051493 |
| 4                | 6                | 0              | 0.860696                | 0.130060  | -0.028029 |
| 5                | 6                | 0              | 0.475051                | -1.181458 | 0.004396  |
| 6                | 8                | 0              | -0.831751               | -1.549796 | 0.015654  |
| 7                | 6                | 0              | 2.291835                | 0.598671  | -0.033217 |
| 8                | 6                | 0              | 1.337491                | -2.401647 | 0.030544  |
| 9                | 6                | 0              | -3.143227               | -1.122957 | 0.034797  |
| 10               | 6                | 0              | -4.189156               | -0.189191 | 0.022507  |
| 11               | 6                | 0              | -3.936437               | 1.196473  | -0.016452 |
| 12               | 6                | 0              | -2.630339               | 1.660972  | -0.042225 |
| 13               | 8                | 0              | -5.498576               | -0.533054 | 0.046518  |
| 14               | 6                | 0              | -5.855028               | -1.922375 | 0.090290  |
| 15               | 8                | 0              | -2.389207               | 2.987766  | -0.079212 |
| 16               | 8                | 0              | 0.134743                | 2.402985  | -0.083527 |
| 17               | 8                | 0              | 3.051649                | -0.012274 | -1.146470 |
| 18               | 6                | 0              | 4.347313                | -0.153806 | -0.800515 |
| 19               | 6                | 0              | 4.565925                | 0.351648  | 0.630730  |
| 20               | 6                | 0              | 3.155077                | 0.322013  | 1.210566  |
| 21               | 8                | 0              | 5.179307                | -0.626700 | -1.546149 |
| 22               | 8                | 0              | 5.460760                | -0.458507 | 1.365855  |
| 23               | 1                | 0              | 2.270780                | 1.670781  | -0.237142 |
| 24               | 1                | 0              | 0.991168                | -3.105813 | -0.732062 |
| 25               | 1                | 0              | 2.382375                | -2.173061 | -0.157516 |
| 26               | 1                | 0              | 1.246173                | -2.897749 | 1.003371  |
| 27               | 1                | 0              | -3.306064               | -2.191343 | 0.063066  |
| 28               | 1                | 0              | -4.766073               | 1.893955  | -0.025346 |
| 29               | 1                | 0              | -6.943990               | -1.943041 | 0.103068  |
| 30               | 1                | 0              | -5.486225               | -2.447891 | -0.796135 |
| 31               | 1                | 0              | -5.466257               | -2.396222 | 0.997122  |
| 32               | 1                | 0              | -1.397376               | 3.091145  | -0.091221 |
| 33               | 1                | 0              | 4.936813                | 1.385309  | 0.558738  |
| 34               | 1                | 0              | 2.955541                | -0.669908 | 1.626531  |
| 35               | 1                | 0              | 2.985115                | 1.068670  | 1.987958  |
| 36               | 1                | 0              | 6.326989                | -0.438616 | 0.932128  |

**Table S6.** Cartesian coordinates for the low-energy optimized conformers of 14S-5 at B3LYP/6 - 31+g (d,p) level of theory in MeOH.

5A:

| Center<br>Number | Atomic<br>Number | Atomic<br>Type | Coordinates (Angstroms) |           |           |
|------------------|------------------|----------------|-------------------------|-----------|-----------|
|                  |                  |                | X                       | Y         | Z         |
| 1                | 8                | 0              | 4.049994                | 3.244841  | 0.050126  |
| 2                | 6                | 0              | 5.296592                | -0.134494 | -0.689814 |
| 3                | 6                | 0              | 4.369161                | -0.904772 | 0.021069  |
| 4                | 6                | 0              | 3.341800                | -0.268302 | 0.729011  |
| 5                | 6                | 0              | 3.248731                | 1.127319  | 0.727030  |
| 6                | 6                | 0              | 4.186431                | 1.881320  | 0.012318  |
| 7                | 6                | 0              | 5.214815                | 1.261012  | -0.701856 |
| 8                | 8                | 0              | 6.324900                | -0.698076 | -1.399550 |
| 9                | 6                | 0              | 2.316254                | -1.090211 | 1.498812  |
| 10               | 6                | 0              | 1.013824                | -1.243206 | 0.757393  |
| 11               | 6                | 0              | -0.173138               | -0.701838 | 1.183414  |
| 12               | 8                | 0              | 1.103417                | -1.960397 | -0.364561 |
| 13               | 6                | 0              | -1.394844               | -0.875555 | 0.439488  |
| 14               | 6                | 0              | -2.623290               | -0.287833 | 0.915462  |
| 15               | 8                | 0              | -1.391110               | -1.557475 | -0.657078 |
| 16               | 6                | 0              | -3.804526               | -0.441696 | 0.237461  |
| 17               | 6                | 0              | -5.111584               | 0.155822  | 0.663979  |
| 18               | 8                | 0              | -3.870692               | -1.146290 | -0.903641 |
| 19               | 6                | 0              | -5.725853               | 1.105841  | -0.392596 |
| 20               | 6                | 0              | -6.938623               | 1.843283  | 0.159417  |
| 21               | 8                | 0              | -6.160086               | 0.388024  | -1.557389 |
| 22               | 1                | 0              | 4.750829                | 3.668000  | -0.466282 |
| 23               | 1                | 0              | 4.448467                | -1.988286 | 0.023398  |
| 24               | 1                | 0              | 2.463065                | 1.637622  | 1.275118  |
| 25               | 1                | 0              | 5.947654                | 1.839755  | -1.255983 |
| 26               | 1                | 0              | 6.289216                | -1.662862 | -1.330057 |
| 27               | 1                | 0              | 2.715997                | -2.093178 | 1.686099  |
| 28               | 1                | 0              | 2.114478                | -0.625855 | 2.467156  |
| 29               | 1                | 0              | -0.192571               | -0.128831 | 2.101811  |
| 30               | 1                | 0              | 0.179783                | -1.984030 | -0.756487 |
| 31               | 1                | 0              | -2.611660               | 0.289645  | 1.831222  |
| 32               | 1                | 0              | -5.830264               | -0.652387 | 0.854318  |
| 33               | 1                | 0              | -4.963044               | 0.701749  | 1.599233  |
| 34               | 1                | 0              | -2.933692               | -1.468408 | -1.090620 |
| 35               | 1                | 0              | -4.960709               | 1.839741  | -0.687387 |
| 36               | 1                | 0              | -7.701040               | 1.133372  | 0.498386  |
| 37               | 1                | 0              | -7.376373               | 2.477181  | -0.617581 |
| 38               | 1                | 0              | -6.653181               | 2.479556  | 1.002547  |
| 39               | 1                | 0              | -5.432832               | -0.187957 | -1.841684 |

5B:

| Center<br>Number | Atomic<br>Number | Atomic<br>Type | Coordinates (Angstroms) |           |           |
|------------------|------------------|----------------|-------------------------|-----------|-----------|
|                  |                  |                | X                       | Y         | Z         |
| 1                | 8                | 0              | -6.562755               | -1.368102 | -0.619345 |
| 2                | 6                | 0              | -4.524546               | 1.626264  | -0.299573 |
| 3                | 6                | 0              | -3.420497               | 1.155562  | 0.419789  |
| 4                | 6                | 0              | -3.365732               | -0.190447 | 0.797236  |
| 5                | 6                | 0              | -4.411779               | -1.057299 | 0.458192  |
| 6                | 6                | 0              | -5.508528               | -0.568641 | -0.261437 |
| 7                | 6                | 0              | -5.575490               | 0.772989  | -0.646957 |
| 8                | 8                | 0              | -4.527280               | 2.953888  | -0.641123 |
| 9                | 6                | 0              | -2.165170               | -0.709156 | 1.576776  |
| 10               | 6                | 0              | -0.919672               | -0.823579 | 0.737986  |
| 11               | 6                | 0              | 0.237921                | -0.133393 | 0.995957  |
| 12               | 8                | 0              | -1.025068               | -1.672804 | -0.286354 |
| 13               | 6                | 0              | 1.412864                | -0.291259 | 0.176863  |
| 14               | 6                | 0              | 2.618088                | 0.436213  | 0.491303  |
| 15               | 8                | 0              | 1.389464                | -1.088915 | -0.838266 |
| 16               | 6                | 0              | 3.752658                | 0.311108  | -0.267550 |
| 17               | 6                | 0              | 5.041499                | 1.023795  | 0.011690  |
| 18               | 8                | 0              | 3.794338                | -0.498489 | -1.337781 |
| 19               | 6                | 0              | 6.234729                | 0.066112  | 0.245182  |
| 20               | 6                | 0              | 7.467633                | 0.817950  | 0.728703  |
| 21               | 8                | 0              | 6.602357                | -0.619881 | -0.961189 |
| 22               | 1                | 0              | -6.417259               | -2.272402 | -0.306057 |
| 23               | 1                | 0              | -2.622092               | 1.844128  | 0.677811  |
| 24               | 1                | 0              | -4.375952               | -2.102753 | 0.751848  |
| 25               | 1                | 0              | -6.435827               | 1.133490  | -1.202865 |
| 26               | 1                | 0              | -5.334873               | 3.174433  | -1.127034 |
| 27               | 1                | 0              | -1.954617               | -0.054246 | 2.426432  |
| 28               | 1                | 0              | -2.392666               | -1.704419 | 1.975614  |
| 29               | 1                | 0              | 0.272998                | 0.541671  | 1.841671  |
| 30               | 1                | 0              | -0.137260               | -1.660102 | -0.753753 |
| 31               | 1                | 0              | 2.627124                | 1.096925  | 1.349025  |
| 32               | 1                | 0              | 5.285852                | 1.670680  | -0.841401 |
| 33               | 1                | 0              | 4.910001                | 1.660427  | 0.890361  |
| 34               | 1                | 0              | 2.884700                | -0.928767 | -1.401117 |
| 35               | 1                | 0              | 5.943494                | -0.674519 | 1.005212  |
| 36               | 1                | 0              | 7.755672                | 1.591966  | 0.008960  |
| 37               | 1                | 0              | 8.305914                | 0.124544  | 0.845843  |
| 38               | 1                | 0              | 7.275955                | 1.292633  | 1.695717  |
| 39               | 1                | 0              | 5.796516                | -0.996590 | -1.348764 |

5C:

| Center<br>Number | Atomic<br>Number | Atomic<br>Type | Coordinates (Angstroms) |           |           |
|------------------|------------------|----------------|-------------------------|-----------|-----------|
|                  |                  |                | X                       | Y         | Z         |
| 1                | 8                | 0              | -4.136711               | -2.290647 | -2.186729 |
| 2                | 6                | 0              | -4.366108               | -0.913579 | 1.215816  |
| 3                | 6                | 0              | -3.755352               | 0.329965  | 1.023186  |
| 4                | 6                | 0              | -3.275252               | 0.676213  | -0.247794 |
| 5                | 6                | 0              | -3.417034               | -0.215533 | -1.315247 |
| 6                | 6                | 0              | -4.028795               | -1.457397 | -1.104002 |
| 7                | 6                | 0              | -4.508485               | -1.816833 | 0.157637  |
| 8                | 8                | 0              | -4.857574               | -1.307810 | 2.433000  |
| 9                | 6                | 0              | -2.608507               | 2.017664  | -0.462476 |
| 10               | 6                | 0              | -1.108548               | 2.051898  | -0.303968 |
| 11               | 6                | 0              | -0.306674               | 0.974931  | -0.023979 |
| 12               | 8                | 0              | -0.607865               | 3.278826  | -0.474718 |
| 13               | 6                | 0              | 1.122258                | 1.108554  | 0.094396  |
| 14               | 6                | 0              | 1.936112                | -0.049399 | 0.375338  |
| 15               | 8                | 0              | 1.680853                | 2.263948  | -0.054997 |
| 16               | 6                | 0              | 3.298253                | 0.040376  | 0.496516  |
| 17               | 6                | 0              | 4.204769                | -1.122900 | 0.766682  |
| 18               | 8                | 0              | 3.938324                | 1.212754  | 0.357563  |
| 19               | 6                | 0              | 5.271347                | -1.337479 | -0.334211 |
| 20               | 6                | 0              | 6.031230                | -2.641205 | -0.128679 |
| 21               | 8                | 0              | 6.240438                | -0.278455 | -0.342085 |
| 22               | 1                | 0              | -4.571008               | -3.118104 | -1.934368 |
| 23               | 1                | 0              | -3.654655               | 1.022192  | 1.854991  |
| 24               | 1                | 0              | -3.058104               | 0.038188  | -2.307679 |
| 25               | 1                | 0              | -4.990877               | -2.774634 | 0.328013  |
| 26               | 1                | 0              | -4.711645               | -0.614432 | 3.092550  |
| 27               | 1                | 0              | -2.828097               | 2.394382  | -1.469587 |
| 28               | 1                | 0              | -3.018284               | 2.762125  | 0.231275  |
| 29               | 1                | 0              | -0.756295               | -0.000210 | 0.105015  |
| 30               | 1                | 0              | 0.386034                | 3.194993  | -0.356381 |
| 31               | 1                | 0              | 1.458301                | -1.013959 | 0.491837  |
| 32               | 1                | 0              | 4.726086                | -0.957873 | 1.719074  |
| 33               | 1                | 0              | 3.599675                | -2.027728 | 0.866440  |
| 34               | 1                | 0              | 3.227155                | 1.899195  | 0.157050  |
| 35               | 1                | 0              | 4.763441                | -1.366592 | -1.310083 |
| 36               | 1                | 0              | 6.515192                | -2.656014 | 0.854040  |
| 37               | 1                | 0              | 6.803283                | -2.748958 | -0.896522 |
| 38               | 1                | 0              | 5.354332                | -3.497991 | -0.198575 |
| 39               | 1                | 0              | 5.760458                | 0.564842  | -0.338654 |

5D:

| Center<br>Number | Atomic<br>Number | Atomic<br>Type | Coordinates (Angstroms) |           |           |
|------------------|------------------|----------------|-------------------------|-----------|-----------|
|                  |                  |                | X                       | Y         | Z         |
| 1                | 8                | 0              | -6.328667               | -0.675779 | -1.347448 |
| 2                | 6                | 0              | -4.118847               | 1.809897  | 0.122121  |
| 3                | 6                | 0              | -3.158145               | 1.012600  | 0.754288  |
| 4                | 6                | 0              | -3.259638               | -0.380577 | 0.679735  |
| 5                | 6                | 0              | -4.318539               | -0.970813 | -0.021332 |
| 6                | 6                | 0              | -5.269548               | -0.157524 | -0.648509 |
| 7                | 6                | 0              | -5.179433               | 1.235850  | -0.584056 |
| 8                | 8                | 0              | -3.971737               | 3.168453  | 0.231270  |
| 9                | 6                | 0              | -2.211780               | -1.251277 | 1.359871  |
| 10               | 6                | 0              | -0.903043               | -1.287528 | 0.615292  |
| 11               | 6                | 0              | 0.279866                | -0.822573 | 1.132432  |
| 12               | 8                | 0              | -0.980687               | -1.824514 | -0.604184 |
| 13               | 6                | 0              | 1.511374                | -0.890270 | 0.387295  |
| 14               | 6                | 0              | 2.736893                | -0.399299 | 0.968528  |
| 15               | 8                | 0              | 1.519454                | -1.392402 | -0.802280 |
| 16               | 6                | 0              | 3.930085                | -0.467684 | 0.297764  |
| 17               | 6                | 0              | 5.241627                | 0.010905  | 0.845248  |
| 18               | 8                | 0              | 4.010633                | -0.986296 | -0.938121 |
| 19               | 6                | 0              | 5.968612                | 1.047343  | -0.048770 |
| 20               | 6                | 0              | 5.129845                | 2.291777  | -0.342943 |
| 21               | 8                | 0              | 6.455863                | 0.447156  | -1.259147 |
| 22               | 1                | 0              | -6.296374               | -1.643160 | -1.334994 |
| 23               | 1                | 0              | -2.347873               | 1.487960  | 1.298023  |
| 24               | 1                | 0              | -4.403966               | -2.052309 | -0.078469 |
| 25               | 1                | 0              | -5.929718               | 1.848393  | -1.075022 |
| 26               | 1                | 0              | -4.689622               | 3.623408  | -0.231884 |
| 27               | 1                | 0              | -2.025224               | -0.892741 | 2.375444  |
| 28               | 1                | 0              | -2.583745               | -2.279465 | 1.434542  |
| 29               | 1                | 0              | 0.290131                | -0.399465 | 2.129038  |
| 30               | 1                | 0              | -0.052577               | -1.791599 | -0.984475 |
| 31               | 1                | 0              | 2.714911                | 0.028595  | 1.962860  |
| 32               | 1                | 0              | 5.079787                | 0.440233  | 1.837529  |
| 33               | 1                | 0              | 5.905849                | -0.854923 | 0.961511  |
| 34               | 1                | 0              | 3.073759                | -1.258230 | -1.191065 |
| 35               | 1                | 0              | 6.871463                | 1.347063  | 0.492896  |
| 36               | 1                | 0              | 4.229309                | 2.041267  | -0.914548 |
| 37               | 1                | 0              | 5.717840                | 3.005283  | -0.927449 |
| 38               | 1                | 0              | 4.819478                | 2.780717  | 0.586894  |
| 39               | 1                | 0              | 5.711735                | -0.008944 | -1.683344 |

5E:

| Center<br>Number | Atomic<br>Number | Atomic<br>Type | Coordinates (Angstroms) |           |           |
|------------------|------------------|----------------|-------------------------|-----------|-----------|
|                  |                  |                | X                       | Y         | Z         |
| 1                | 8                | 0              | 4.685078                | 2.921623  | -0.311469 |
| 2                | 6                | 0              | 5.349832                | -0.693896 | -0.380890 |
| 3                | 6                | 0              | 4.233065                | -1.166593 | 0.317604  |
| 4                | 6                | 0              | 3.278695                | -0.257733 | 0.791461  |
| 5                | 6                | 0              | 3.446433                | 1.113305  | 0.571047  |
| 6                | 6                | 0              | 4.570418                | 1.568000  | -0.127959 |
| 7                | 6                | 0              | 5.529412                | 0.673349  | -0.610283 |
| 8                | 8                | 0              | 6.316906                | -1.534489 | -0.867637 |
| 9                | 6                | 0              | 2.051105                | -0.756801 | 1.540493  |
| 10               | 6                | 0              | 0.809802                | -0.785937 | 0.687249  |
| 11               | 6                | 0              | -0.320720               | -0.058510 | 0.963280  |
| 12               | 8                | 0              | 0.888379                | -1.598099 | -0.368775 |
| 13               | 6                | 0              | -1.494145               | -0.138168 | 0.130712  |
| 14               | 6                | 0              | -2.673609               | 0.621610  | 0.466265  |
| 15               | 8                | 0              | -1.493419               | -0.896452 | -0.914476 |
| 16               | 6                | 0              | -3.807802               | 0.567582  | -0.301394 |
| 17               | 6                | 0              | -5.068672               | 1.325175  | -0.010376 |
| 18               | 8                | 0              | -3.874081               | -0.198982 | -1.401747 |
| 19               | 6                | 0              | -6.326903               | 0.432630  | 0.140203  |
| 20               | 6                | 0              | -6.184123               | -0.639951 | 1.221056  |
| 21               | 8                | 0              | -6.717956               | -0.140741 | -1.117054 |
| 22               | 1                | 0              | 5.495084                | 3.127473  | -0.799616 |
| 23               | 1                | 0              | 4.109614                | -2.232196 | 0.489194  |
| 24               | 1                | 0              | 2.720823                | 1.833212  | 0.936167  |
| 25               | 1                | 0              | 6.405147                | 1.020212  | -1.150734 |
| 26               | 1                | 0              | 6.094822                | -2.453614 | -0.660318 |
| 27               | 1                | 0              | 2.232524                | -1.776223 | 1.900472  |
| 28               | 1                | 0              | 1.859371                | -0.127568 | 2.413237  |
| 29               | 1                | 0              | -0.335930               | 0.584463  | 1.834151  |
| 30               | 1                | 0              | 0.005056                | -1.529333 | -0.840780 |
| 31               | 1                | 0              | -2.663701               | 1.248254  | 1.349220  |
| 32               | 1                | 0              | -4.931725               | 1.912103  | 0.901606  |
| 33               | 1                | 0              | -5.251769               | 2.026643  | -0.834117 |
| 34               | 1                | 0              | -2.981087               | -0.659545 | -1.478119 |
| 35               | 1                | 0              | -7.152799               | 1.099492  | 0.407731  |
| 36               | 1                | 0              | -5.387089               | -1.350448 | 0.975486  |
| 37               | 1                | 0              | -7.120796               | -1.196475 | 1.317592  |
| 38               | 1                | 0              | -5.950632               | -0.186348 | 2.190465  |
| 39               | 1                | 0              | -5.942907               | -0.587370 | -1.493179 |

5F:

| Center<br>Number | Atomic<br>Number | Atomic<br>Type | Coordinates (Angstroms) |           |           |
|------------------|------------------|----------------|-------------------------|-----------|-----------|
|                  |                  |                | X                       | Y         | Z         |
| 1                | 8                | 0              | 4.753181                | -1.047964 | 2.530461  |
| 2                | 6                | 0              | 4.081683                | -1.388252 | -1.026263 |
| 3                | 6                | 0              | 3.410341                | -0.193337 | -1.314451 |
| 4                | 6                | 0              | 3.176974                | 0.732417  | -0.293240 |
| 5                | 6                | 0              | 3.623526                | 0.466966  | 1.009309  |
| 6                | 6                | 0              | 4.292086                | -0.731379 | 1.279236  |
| 7                | 6                | 0              | 4.527692                | -1.667753 | 0.267229  |
| 8                | 8                | 0              | 4.281339                | -2.257509 | -2.066913 |
| 9                | 6                | 0              | 2.449219                | 2.025001  | -0.592806 |
| 10               | 6                | 0              | 0.951286                | 2.006783  | -0.414379 |
| 11               | 6                | 0              | 0.201711                | 0.922333  | -0.036200 |
| 12               | 8                | 0              | 0.394662                | 3.193580  | -0.673108 |
| 13               | 6                | 0              | -1.229488               | 1.005231  | 0.101283  |
| 14               | 6                | 0              | -1.985273               | -0.157092 | 0.500936  |
| 15               | 8                | 0              | -1.840926               | 2.118755  | -0.133045 |
| 16               | 6                | 0              | -3.346046               | -0.113822 | 0.656420  |
| 17               | 6                | 0              | -4.191138               | -1.278735 | 1.077530  |
| 18               | 8                | 0              | -4.042156               | 1.012961  | 0.433798  |
| 19               | 6                | 0              | -5.326975               | -1.635345 | 0.085089  |
| 20               | 6                | 0              | -4.825613               | -1.936806 | -1.327998 |
| 21               | 8                | 0              | -6.350075               | -0.627560 | 0.072774  |
| 22               | 1                | 0              | 4.539288                | -0.339207 | 3.154010  |
| 23               | 1                | 0              | 3.078975                | -0.001390 | -2.330034 |
| 24               | 1                | 0              | 3.452004                | 1.186744  | 1.805451  |
| 25               | 1                | 0              | 5.054580                | -2.588869 | 0.497418  |
| 26               | 1                | 0              | 4.755423                | -3.044676 | -1.762541 |
| 27               | 1                | 0              | 2.833887                | 2.834007  | 0.040846  |
| 28               | 1                | 0              | 2.640828                | 2.337985  | -1.626856 |
| 29               | 1                | 0              | 0.696092                | -0.018680 | 0.163525  |
| 30               | 1                | 0              | -0.592922               | 3.076975  | -0.531091 |
| 31               | 1                | 0              | -1.462918               | -1.087094 | 0.686812  |
| 32               | 1                | 0              | -3.550593               | -2.152897 | 1.221344  |
| 33               | 1                | 0              | -4.653313               | -1.041598 | 2.044203  |
| 34               | 1                | 0              | -3.368944               | 1.708212  | 0.152852  |
| 35               | 1                | 0              | -5.822017               | -2.526268 | 0.484533  |
| 36               | 1                | 0              | -4.353089               | -1.057729 | -1.780084 |
| 37               | 1                | 0              | -5.663617               | -2.238934 | -1.962739 |
| 38               | 1                | 0              | -4.091729               | -2.749979 | -1.314860 |
| 39               | 1                | 0              | -5.920045               | 0.228033  | -0.084704 |



5G:

| Center<br>Number | Atomic<br>Number | Atomic<br>Type | Coordinates (Angstroms) |           |           |
|------------------|------------------|----------------|-------------------------|-----------|-----------|
|                  |                  |                | X                       | Y         | Z         |
| 1                | 8                | 0              | 4.715573                | -1.037570 | 2.540210  |
| 2                | 6                | 0              | 4.041767                | -1.362385 | -1.060605 |
| 3                | 6                | 0              | 3.386743                | -0.150614 | -1.302034 |
| 4                | 6                | 0              | 3.178154                | 0.746714  | -0.244803 |
| 5                | 6                | 0              | 3.634991                | 0.433048  | 1.038571  |
| 6                | 6                | 0              | 4.290646                | -0.784285 | 1.262070  |
| 7                | 6                | 0              | 4.500053                | -1.689784 | 0.219725  |
| 8                | 8                | 0              | 4.273429                | -2.280493 | -2.051482 |
| 9                | 6                | 0              | 2.461379                | 2.055479  | -0.496869 |
| 10               | 6                | 0              | 0.958869                | 2.030025  | -0.361887 |
| 11               | 6                | 0              | 0.206850                | 0.947959  | 0.018242  |
| 12               | 8                | 0              | 0.402018                | 3.209266  | -0.652654 |
| 13               | 6                | 0              | -1.227209               | 1.025053  | 0.124828  |
| 14               | 6                | 0              | -1.984092               | -0.133768 | 0.532751  |
| 15               | 8                | 0              | -1.840028               | 2.129961  | -0.143973 |
| 16               | 6                | 0              | -3.347731               | -0.095781 | 0.661224  |
| 17               | 6                | 0              | -4.193916               | -1.256373 | 1.091986  |
| 18               | 8                | 0              | -4.046144               | 1.021680  | 0.401326  |
| 19               | 6                | 0              | -5.302753               | -1.648138 | 0.082439  |
| 20               | 6                | 0              | -4.764842               | -1.988064 | -1.308257 |
| 21               | 8                | 0              | -6.330050               | -0.646857 | 0.015113  |
| 22               | 1                | 0              | 5.156843                | -1.897988 | 2.584771  |
| 23               | 1                | 0              | 3.040964                | 0.091732  | -2.303555 |
| 24               | 1                | 0              | 3.488768                | 1.118355  | 1.867414  |
| 25               | 1                | 0              | 5.011820                | -2.633169 | 0.384368  |
| 26               | 1                | 0              | 3.909951                | -1.964172 | -2.891055 |
| 27               | 1                | 0              | 2.828694                | 2.828411  | 0.190041  |
| 28               | 1                | 0              | 2.682458                | 2.422971  | -1.506684 |
| 29               | 1                | 0              | 0.701914                | 0.013749  | 0.246083  |
| 30               | 1                | 0              | -0.587659               | 3.090103  | -0.529124 |
| 31               | 1                | 0              | -1.460097               | -1.056379 | 0.748424  |
| 32               | 1                | 0              | -3.550337               | -2.121120 | 1.274156  |
| 33               | 1                | 0              | -4.680946               | -0.997693 | 2.040764  |
| 34               | 1                | 0              | -3.371851               | 1.715450  | 0.119522  |
| 35               | 1                | 0              | -5.803264               | -2.529820 | 0.495399  |
| 36               | 1                | 0              | -4.281393               | -1.121382 | -1.772569 |
| 37               | 1                | 0              | -5.586124               | -2.309027 | -1.955524 |
| 38               | 1                | 0              | -4.031093               | -2.799750 | -1.253819 |
| 39               | 1                | 0              | -5.900495               | 0.207314  | -0.151203 |

5H:

| Center<br>Number | Atomic<br>Number | Atomic<br>Type | Coordinates (Angstroms) |           |           |
|------------------|------------------|----------------|-------------------------|-----------|-----------|
|                  |                  |                | X                       | Y         | Z         |
| 1                | 8                | 0              | 4.504456                | 3.044081  | -0.214651 |
| 2                | 6                | 0              | 5.446067                | -0.508545 | -0.318710 |
| 3                | 6                | 0              | 4.349946                | -1.077170 | 0.340308  |
| 4                | 6                | 0              | 3.316700                | -0.251672 | 0.801129  |
| 5                | 6                | 0              | 3.384794                | 1.131777  | 0.605810  |
| 6                | 6                | 0              | 4.488926                | 1.682744  | -0.054109 |
| 7                | 6                | 0              | 5.526574                | 0.872102  | -0.521953 |
| 8                | 8                | 0              | 6.488074                | -1.263610 | -0.791094 |
| 9                | 6                | 0              | 2.111334                | -0.855238 | 1.509162  |
| 10               | 6                | 0              | 0.890367                | -0.929485 | 0.629938  |
| 11               | 6                | 0              | -0.271949               | -0.246224 | 0.881294  |
| 12               | 8                | 0              | 1.025744                | -1.731552 | -0.429414 |
| 13               | 6                | 0              | -1.419025               | -0.356580 | 0.013388  |
| 14               | 6                | 0              | -2.626043               | 0.369606  | 0.313678  |
| 15               | 8                | 0              | -1.361867               | -1.109709 | -1.034483 |
| 16               | 6                | 0              | -3.734447               | 0.293208  | -0.492377 |
| 17               | 6                | 0              | -5.006054               | 1.049941  | -0.243714 |
| 18               | 8                | 0              | -3.752896               | -0.461247 | -1.594937 |
| 19               | 6                | 0              | -6.242954               | 0.151316  | -0.103709 |
| 20               | 6                | 0              | -7.523603               | 0.970057  | 0.043036  |
| 21               | 8                | 0              | -6.016074               | -0.679537 | 1.049847  |
| 22               | 1                | 0              | 5.308942                | 3.318958  | -0.677347 |
| 23               | 1                | 0              | 4.302950                | -2.152013 | 0.491871  |
| 24               | 1                | 0              | 2.596148                | 1.787822  | 0.960397  |
| 25               | 1                | 0              | 6.387918                | 1.293909  | -1.031269 |
| 26               | 1                | 0              | 6.332024                | -2.200955 | -0.606690 |
| 27               | 1                | 0              | 2.351880                | -1.872994 | 1.836890  |
| 28               | 1                | 0              | 1.865181                | -0.270176 | 2.398992  |
| 29               | 1                | 0              | -0.332460               | 0.390389  | 1.755018  |
| 30               | 1                | 0              | 0.151143                | -1.690185 | -0.922164 |
| 31               | 1                | 0              | -2.659876               | 0.993248  | 1.198162  |
| 32               | 1                | 0              | -4.897131               | 1.663981  | 0.654896  |
| 33               | 1                | 0              | -5.170597               | 1.724645  | -1.093220 |
| 34               | 1                | 0              | -2.849913               | -0.898093 | -1.649352 |
| 35               | 1                | 0              | -6.316573               | -0.486886 | -0.994119 |
| 36               | 1                | 0              | -7.463549               | 1.632059  | 0.913728  |
| 37               | 1                | 0              | -8.388122               | 0.309339  | 0.169963  |
| 38               | 1                | 0              | -7.697099               | 1.580374  | -0.849680 |
| 39               | 1                | 0              | -6.764154               | -1.285855 | 1.142751  |

5I:

| Center<br>Number | Atomic<br>Number | Atomic<br>Type | Coordinates (Angstroms) |           |           |
|------------------|------------------|----------------|-------------------------|-----------|-----------|
|                  |                  |                | X                       | Y         | Z         |
| 1                | 8                | 0              | -6.506650               | -0.605162 | -1.070476 |
| 2                | 6                | 0              | -4.097703               | 1.874751  | 0.056372  |
| 3                | 6                | 0              | -3.130123               | 1.081518  | 0.682886  |
| 4                | 6                | 0              | -3.294936               | -0.307135 | 0.721651  |
| 5                | 6                | 0              | -4.423755               | -0.896031 | 0.138727  |
| 6                | 6                | 0              | -5.381268               | -0.086874 | -0.484083 |
| 7                | 6                | 0              | -5.228455               | 1.301562  | -0.532043 |
| 8                | 8                | 0              | -3.885532               | 3.229118  | 0.050431  |
| 9                | 6                | 0              | -2.240657               | -1.174630 | 1.395831  |
| 10               | 6                | 0              | -0.969307               | -1.285085 | 0.595677  |
| 11               | 6                | 0              | 0.250162                | -0.840073 | 1.037909  |
| 12               | 8                | 0              | -1.120766               | -1.868598 | -0.596323 |
| 13               | 6                | 0              | 1.443763                | -0.978969 | 0.239245  |
| 14               | 6                | 0              | 2.708896                | -0.508889 | 0.742001  |
| 15               | 8                | 0              | 1.375901                | -1.527863 | -0.927957 |
| 16               | 6                | 0              | 3.866610                | -0.632380 | 0.015236  |
| 17               | 6                | 0              | 5.214006                | -0.186412 | 0.501518  |
| 18               | 8                | 0              | 3.880144                | -1.191197 | -1.198489 |
| 19               | 6                | 0              | 5.882378                | 0.859037  | -0.403254 |
| 20               | 6                | 0              | 7.291600                | 1.201325  | 0.075230  |
| 21               | 8                | 0              | 5.027162                | 2.016752  | -0.389288 |
| 22               | 1                | 0              | -6.513360               | -1.569501 | -0.986172 |
| 23               | 1                | 0              | -2.264061               | 1.556589  | 1.132717  |
| 24               | 1                | 0              | -4.557864               | -1.973732 | 0.168047  |
| 25               | 1                | 0              | -5.984206               | 1.911533  | -1.017919 |
| 26               | 1                | 0              | -4.611156               | 3.681810  | -0.402685 |
| 27               | 1                | 0              | -1.997576               | -0.773817 | 2.383434  |
| 28               | 1                | 0              | -2.637274               | -2.186372 | 1.538129  |
| 29               | 1                | 0              | 0.320785                | -0.377050 | 2.014158  |
| 30               | 1                | 0              | -0.208888               | -1.879606 | -1.017577 |
| 31               | 1                | 0              | 2.748617                | -0.047408 | 1.720677  |
| 32               | 1                | 0              | 5.123556                | 0.213952  | 1.515480  |
| 33               | 1                | 0              | 5.868007                | -1.066221 | 0.544909  |
| 34               | 1                | 0              | 2.930367                | -1.451367 | -1.396498 |
| 35               | 1                | 0              | 5.929058                | 0.461688  | -1.425748 |
| 36               | 1                | 0              | 7.270906                | 1.579357  | 1.103141  |
| 37               | 1                | 0              | 7.738807                | 1.968258  | -0.566377 |
| 38               | 1                | 0              | 7.937361                | 0.317386  | 0.040117  |
| 39               | 1                | 0              | 5.397589                | 2.679811  | -0.988434 |

5J:

| Center<br>Number | Atomic<br>Number | Atomic<br>Type | Coordinates (Angstroms) |           |           |
|------------------|------------------|----------------|-------------------------|-----------|-----------|
|                  |                  |                | X                       | Y         | Z         |
| 1                | 8                | 0              | 6.492524                | -1.289098 | -0.654402 |
| 2                | 6                | 0              | 4.471828                | 1.674591  | -0.058994 |
| 3                | 6                | 0              | 3.346694                | 1.140680  | 0.579122  |
| 4                | 6                | 0              | 3.271785                | -0.237316 | 0.807555  |
| 5                | 6                | 0              | 4.318491                | -1.074158 | 0.400993  |
| 6                | 6                | 0              | 5.435977                | -0.522473 | -0.236278 |
| 7                | 6                | 0              | 5.523434                | 0.852461  | -0.472615 |
| 8                | 8                | 0              | 4.493683                | 3.031375  | -0.253286 |
| 9                | 6                | 0              | 2.045879                | -0.823265 | 1.494779  |
| 10               | 6                | 0              | 0.846976                | -0.907753 | 0.586986  |
| 11               | 6                | 0              | -0.320440               | -0.219291 | 0.800917  |
| 12               | 8                | 0              | 1.006121                | -1.724331 | -0.456864 |
| 13               | 6                | 0              | -1.445330               | -0.341529 | -0.092127 |
| 14               | 6                | 0              | -2.659607               | 0.392203  | 0.170253  |
| 15               | 8                | 0              | -1.367482               | -1.108854 | -1.126626 |
| 16               | 6                | 0              | -3.752431               | 0.301880  | -0.655054 |
| 17               | 6                | 0              | -5.047426               | 1.016365  | -0.413112 |
| 18               | 8                | 0              | -3.754246               | -0.475012 | -1.744189 |
| 19               | 6                | 0              | -6.176068               | 0.075715  | 0.074117  |
| 20               | 6                | 0              | -7.504148               | 0.811385  | 0.185847  |
| 21               | 8                | 0              | -5.883125               | -0.455596 | 1.376550  |
| 22               | 1                | 0              | 6.332569                | -2.220880 | -0.446481 |
| 23               | 1                | 0              | 2.547951                | 1.805745  | 0.891840  |
| 24               | 1                | 0              | 4.265964                | -2.144584 | 0.579510  |
| 25               | 1                | 0              | 6.400706                | 1.261506  | -0.964938 |
| 26               | 1                | 0              | 5.313790                | 3.294515  | -0.694879 |
| 27               | 1                | 0              | 2.273384                | -1.836331 | 1.845510  |
| 28               | 1                | 0              | 1.780202                | -0.222466 | 2.368348  |
| 29               | 1                | 0              | -0.401191               | 0.429354  | 1.664088  |
| 30               | 1                | 0              | 0.144233                | -1.690389 | -0.971523 |
| 31               | 1                | 0              | -2.708105               | 1.038025  | 1.038082  |
| 32               | 1                | 0              | -4.902309               | 1.808467  | 0.327038  |
| 33               | 1                | 0              | -5.365834               | 1.476757  | -1.355794 |
| 34               | 1                | 0              | -2.850859               | -0.910787 | -1.778831 |
| 35               | 1                | 0              | -6.275448               | -0.753244 | -0.639704 |
| 36               | 1                | 0              | -7.423863               | 1.648047  | 0.888351  |
| 37               | 1                | 0              | -8.282933               | 0.131404  | 0.543325  |
| 38               | 1                | 0              | -7.808743               | 1.203471  | -0.789096 |
| 39               | 1                | 0              | -5.072998               | -0.983438 | 1.331351  |

5K:

| Center<br>Number | Atomic<br>Number | Atomic<br>Type | Coordinates (Angstroms) |           |           |
|------------------|------------------|----------------|-------------------------|-----------|-----------|
|                  |                  |                | X                       | Y         | Z         |
| 1                | 8                | 0              | -4.539245               | 2.934752  | -0.351330 |
| 2                | 6                | 0              | -5.404309               | -0.636775 | -0.241101 |
| 3                | 6                | 0              | -4.271466               | -1.148375 | 0.402742  |
| 4                | 6                | 0              | -3.241393               | -0.279586 | 0.783621  |
| 5                | 6                | 0              | -3.347803               | 1.090558  | 0.521987  |
| 6                | 6                | 0              | -4.487177               | 1.584019  | -0.123086 |
| 7                | 6                | 0              | -5.523075               | 0.729550  | -0.510395 |
| 8                | 8                | 0              | -6.445607               | -1.436749 | -0.634377 |
| 9                | 6                | 0              | -2.001690               | -0.821568 | 1.481718  |
| 10               | 6                | 0              | -0.784630               | -0.840431 | 0.594421  |
| 11               | 6                | 0              | 0.358761                | -0.129417 | 0.854890  |
| 12               | 8                | 0              | -0.901459               | -1.624545 | -0.480699 |
| 13               | 6                | 0              | 1.505515                | -0.190340 | -0.018892 |
| 14               | 6                | 0              | 2.693271                | 0.560732  | 0.294086  |
| 15               | 8                | 0              | 1.463941                | -0.921629 | -1.083070 |
| 16               | 6                | 0              | 3.804736                | 0.528800  | -0.512167 |
| 17               | 6                | 0              | 5.060657                | 1.302383  | -0.230749 |
| 18               | 8                | 0              | 3.834509                | -0.195438 | -1.635283 |
| 19               | 6                | 0              | 6.247005                | 0.480563  | 0.317734  |
| 20               | 6                | 0              | 6.773859                | -0.604557 | -0.619126 |
| 21               | 8                | 0              | 5.820090                | -0.073521 | 1.574878  |
| 22               | 1                | 0              | -5.366015               | 3.168732  | -0.796847 |
| 23               | 1                | 0              | -4.194959               | -2.213014 | 0.605929  |
| 24               | 1                | 0              | -2.562152               | 1.780359  | 0.813671  |
| 25               | 1                | 0              | -6.411469               | 1.107300  | -1.007791 |
| 26               | 1                | 0              | -6.263830               | -2.359011 | -0.403353 |
| 27               | 1                | 0              | -1.776648               | -0.223720 | 2.368929  |
| 28               | 1                | 0              | -2.191140               | -1.848497 | 1.814610  |
| 29               | 1                | 0              | 0.405064                | 0.490805  | 1.741173  |
| 30               | 1                | 0              | -0.030466               | -1.547356 | -0.975637 |
| 31               | 1                | 0              | 2.711785                | 1.165734  | 1.191661  |
| 32               | 1                | 0              | 5.385690                | 1.783495  | -1.160194 |
| 33               | 1                | 0              | 4.833698                | 2.089239  | 0.493176  |
| 34               | 1                | 0              | 2.941842                | -0.652611 | -1.696546 |
| 35               | 1                | 0              | 7.051757                | 1.205789  | 0.504349  |
| 36               | 1                | 0              | 6.011249                | -1.361252 | -0.820099 |
| 37               | 1                | 0              | 7.644356                | -1.095238 | -0.169483 |
| 38               | 1                | 0              | 7.090824                | -0.169426 | -1.572830 |
| 39               | 1                | 0              | 6.569034                | -0.537629 | 1.974241  |

5L:

| Center<br>Number | Atomic<br>Number | Atomic<br>Type | Coordinates (Angstroms) |           |           |
|------------------|------------------|----------------|-------------------------|-----------|-----------|
|                  |                  |                | X                       | Y         | Z         |
| 1                | 8                | 0              | -4.769356               | -1.290041 | 2.464960  |
| 2                | 6                | 0              | -4.039727               | -1.403590 | -1.139197 |
| 3                | 6                | 0              | -3.432441               | -0.155477 | -1.309151 |
| 4                | 6                | 0              | -3.273917               | 0.693447  | -0.207224 |
| 5                | 6                | 0              | -3.732253               | 0.296935  | 1.054507  |
| 6                | 6                | 0              | -4.339029               | -0.953949 | 1.208020  |
| 7                | 6                | 0              | -4.499102               | -1.814647 | 0.116966  |
| 8                | 8                | 0              | -4.166407               | -2.193651 | -2.251816 |
| 9                | 6                | 0              | -2.610174               | 2.042212  | -0.382182 |
| 10               | 6                | 0              | -1.107300               | 2.069143  | -0.253633 |
| 11               | 6                | 0              | -0.305786               | 0.989327  | 0.016607  |
| 12               | 8                | 0              | -0.603724               | 3.293367  | -0.434971 |
| 13               | 6                | 0              | 1.125110                | 1.117216  | 0.114683  |
| 14               | 6                | 0              | 1.937393                | -0.043165 | 0.390561  |
| 15               | 8                | 0              | 1.686826                | 2.269277  | -0.047694 |
| 16               | 6                | 0              | 3.301270                | 0.040701  | 0.494073  |
| 17               | 6                | 0              | 4.205554                | -1.125217 | 0.760060  |
| 18               | 8                | 0              | 3.945277                | 1.209206  | 0.340406  |
| 19               | 6                | 0              | 5.255153                | -1.353804 | -0.354192 |
| 20               | 6                | 0              | 6.012133                | -2.659205 | -0.148476 |
| 21               | 8                | 0              | 6.228688                | -0.299263 | -0.385107 |
| 22               | 1                | 0              | -5.173240               | -2.169605 | 2.460448  |
| 23               | 1                | 0              | -3.089503               | 0.138532  | -2.296073 |
| 24               | 1                | 0              | -3.624616               | 0.944794  | 1.918616  |
| 25               | 1                | 0              | -4.976563               | -2.783382 | 0.242524  |
| 26               | 1                | 0              | -4.596047               | -3.031164 | -2.026497 |
| 27               | 1                | 0              | -2.850188               | 2.459103  | -1.368410 |
| 28               | 1                | 0              | -3.004228               | 2.758433  | 0.349579  |
| 29               | 1                | 0              | -0.757722               | 0.016716  | 0.156097  |
| 30               | 1                | 0              | 0.391438                | 3.205417  | -0.331026 |
| 31               | 1                | 0              | 1.456658                | -1.004811 | 0.518659  |
| 32               | 1                | 0              | 4.741189                | -0.955751 | 1.703692  |
| 33               | 1                | 0              | 3.597379                | -2.026161 | 0.875156  |
| 34               | 1                | 0              | 3.235075                | 1.898060  | 0.145511  |
| 35               | 1                | 0              | 4.733002                | -1.388853 | -1.322327 |
| 36               | 1                | 0              | 6.511257                | -2.667153 | 0.826703  |
| 37               | 1                | 0              | 6.771549                | -2.777909 | -0.927220 |
| 38               | 1                | 0              | 5.330146                | -3.513288 | -0.199674 |
| 39               | 1                | 0              | 5.752702                | 0.546300  | -0.380530 |

5M:

| Center<br>Number | Atomic<br>Number | Atomic<br>Type | Coordinates (Angstroms) |           |           |
|------------------|------------------|----------------|-------------------------|-----------|-----------|
|                  |                  |                | X                       | Y         | Z         |
| 1                | 8                | 0              | -3.802215               | 3.210718  | -0.113099 |
| 2                | 6                | 0              | -5.234362               | -0.101150 | 0.595337  |
| 3                | 6                | 0              | -4.301278               | -0.920164 | -0.051125 |
| 4                | 6                | 0              | -3.209029               | -0.338705 | -0.706978 |
| 5                | 6                | 0              | -3.057043               | 1.051790  | -0.717475 |
| 6                | 6                | 0              | -4.000432               | 1.855010  | -0.067199 |
| 7                | 6                | 0              | -5.094039               | 1.289602  | 0.594334  |
| 8                | 8                | 0              | -6.323722               | -0.611066 | 1.252939  |
| 9                | 6                | 0              | -2.178228               | -1.215402 | -1.405420 |
| 10               | 6                | 0              | -0.888120               | -1.330204 | -0.636136 |
| 11               | 6                | 0              | 0.317593                | -0.866572 | -1.096546 |
| 12               | 8                | 0              | -1.008823               | -1.934831 | 0.548941  |
| 13               | 6                | 0              | 1.528992                | -1.006429 | -0.324944 |
| 14               | 6                | 0              | 2.778364                | -0.515023 | -0.845000 |
| 15               | 8                | 0              | 1.490245                | -1.577133 | 0.833486  |
| 16               | 6                | 0              | 3.953345                | -0.637689 | -0.144617 |
| 17               | 6                | 0              | 5.281369                | -0.156346 | -0.653785 |
| 18               | 8                | 0              | 3.995415                | -1.225766 | 1.055064  |
| 19               | 6                | 0              | 5.802665                | 1.158550  | -0.035455 |
| 20               | 6                | 0              | 6.058475                | 1.111589  | 1.469774  |
| 21               | 8                | 0              | 4.849897                | 2.181781  | -0.374516 |
| 22               | 1                | 0              | -4.508753               | 3.670951  | 0.361952  |
| 23               | 1                | 0              | -4.425901               | -1.999357 | -0.042871 |
| 24               | 1                | 0              | -2.219702               | 1.520645  | -1.224582 |
| 25               | 1                | 0              | -5.831457               | 1.906981  | 1.098710  |
| 26               | 1                | 0              | -6.323763               | -1.577659 | 1.200379  |
| 27               | 1                | 0              | -2.584255               | -2.225099 | -1.534403 |
| 28               | 1                | 0              | -1.957693               | -0.817796 | -2.399429 |
| 29               | 1                | 0              | 0.363369                | -0.386625 | -2.066095 |
| 30               | 1                | 0              | -0.087641               | -1.944819 | 0.949902  |
| 31               | 1                | 0              | 2.793105                | -0.037696 | -1.816608 |
| 32               | 1                | 0              | 6.026974                | -0.936468 | -0.463243 |
| 33               | 1                | 0              | 5.212257                | -0.014436 | -1.735424 |
| 34               | 1                | 0              | 3.051264                | -1.497730 | 1.265924  |
| 35               | 1                | 0              | 6.751428                | 1.373478  | -0.547207 |
| 36               | 1                | 0              | 5.136388                | 0.920435  | 2.024690  |
| 37               | 1                | 0              | 6.478398                | 2.065780  | 1.807168  |
| 38               | 1                | 0              | 6.779773                | 0.324375  | 1.713438  |
| 39               | 1                | 0              | 5.190199                | 3.032290  | -0.063407 |

5N:

| Center<br>Number | Atomic<br>Number | Atomic<br>Type | Coordinates (Angstroms) |           |           |
|------------------|------------------|----------------|-------------------------|-----------|-----------|
|                  |                  |                | X                       | Y         | Z         |
| 1                | 8                | 0              | -4.839079               | -1.371712 | 2.423324  |
| 2                | 6                | 0              | -4.023319               | -1.448552 | -1.118510 |
| 3                | 6                | 0              | -3.420753               | -0.198778 | -1.308775 |
| 4                | 6                | 0              | -3.278835               | 0.673696  | -0.222521 |
| 5                | 6                | 0              | -3.752002               | 0.299363  | 1.040842  |
| 6                | 6                | 0              | -4.355313               | -0.953421 | 1.210947  |
| 7                | 6                | 0              | -4.495196               | -1.835440 | 0.137746  |
| 8                | 8                | 0              | -4.186184               | -2.344635 | -2.142887 |
| 9                | 6                | 0              | -2.618578               | 2.021648  | -0.415281 |
| 10               | 6                | 0              | -1.116470               | 2.055643  | -0.277407 |
| 11               | 6                | 0              | -0.312402               | 0.980598  | 0.003352  |
| 12               | 8                | 0              | -0.617109               | 3.280855  | -0.463342 |
| 13               | 6                | 0              | 1.117727                | 1.114449  | 0.106924  |
| 14               | 6                | 0              | 1.933227                | -0.041582 | 0.390797  |
| 15               | 8                | 0              | 1.675405                | 2.267995  | -0.058389 |
| 16               | 6                | 0              | 3.296492                | 0.047878  | 0.498613  |
| 17               | 6                | 0              | 4.204334                | -1.113661 | 0.771449  |
| 18               | 8                | 0              | 3.936487                | 1.218194  | 0.342776  |
| 19               | 6                | 0              | 5.257995                | -1.342020 | -0.339106 |
| 20               | 6                | 0              | 6.018826                | -2.644193 | -0.127286 |
| 21               | 8                | 0              | 6.227964                | -0.284252 | -0.370315 |
| 22               | 1                | 0              | -4.694832               | -0.689215 | 3.094408  |
| 23               | 1                | 0              | -3.063629               | 0.090192  | -2.293839 |
| 24               | 1                | 0              | -3.652020               | 0.975219  | 1.886136  |
| 25               | 1                | 0              | -4.966506               | -2.802286 | 0.276170  |
| 26               | 1                | 0              | -3.820199               | -1.984837 | -2.963555 |
| 27               | 1                | 0              | -2.853685               | 2.421811  | -1.409678 |
| 28               | 1                | 0              | -3.020012               | 2.748397  | 0.301836  |
| 29               | 1                | 0              | -0.761201               | 0.006969  | 0.145877  |
| 30               | 1                | 0              | 0.377882                | 3.197589  | -0.353664 |
| 31               | 1                | 0              | 1.455672                | -1.004540 | 0.520871  |
| 32               | 1                | 0              | 4.736665                | -0.938822 | 1.715951  |
| 33               | 1                | 0              | 3.599246                | -2.016488 | 0.887976  |
| 34               | 1                | 0              | 3.224473                | 1.903625  | 0.142597  |
| 35               | 1                | 0              | 4.738770                | -1.381761 | -1.308635 |
| 36               | 1                | 0              | 6.514873                | -2.647715 | 0.849487  |
| 37               | 1                | 0              | 6.781136                | -2.762360 | -0.903283 |
| 38               | 1                | 0              | 5.339996                | -3.500787 | -0.178323 |
| 39               | 1                | 0              | 5.749113                | 0.559687  | -0.370366 |



5O:

| Center<br>Number | Atomic<br>Number | Atomic<br>Type | Coordinates (Angstroms) |           |           |
|------------------|------------------|----------------|-------------------------|-----------|-----------|
|                  |                  |                | X                       | Y         | Z         |
| 1                | 8                | 0              | 4.711654                | -0.988396 | 2.550170  |
| 2                | 6                | 0              | 4.063495                | -1.359279 | -1.052606 |
| 3                | 6                | 0              | 3.396866                | -0.157219 | -1.310276 |
| 4                | 6                | 0              | 3.174286                | 0.748551  | -0.266314 |
| 5                | 6                | 0              | 3.626099                | 0.454199  | 1.025564  |
| 6                | 6                | 0              | 4.291441                | -0.751961 | 1.267280  |
| 7                | 6                | 0              | 4.517493                | -1.667877 | 0.234194  |
| 8                | 8                | 0              | 4.253135                | -2.208701 | -2.111279 |
| 9                | 6                | 0              | 2.449699                | 2.049504  | -0.536086 |
| 10               | 6                | 0              | 0.949413                | 2.024263  | -0.380095 |
| 11               | 6                | 0              | 0.200357                | 0.938520  | -0.004345 |
| 12               | 8                | 0              | 0.390315                | 3.207071  | -0.651489 |
| 13               | 6                | 0              | -1.232451               | 1.015740  | 0.117470  |
| 14               | 6                | 0              | -1.986971               | -0.147426 | 0.517388  |
| 15               | 8                | 0              | -1.846636               | 2.124725  | -0.130873 |
| 16               | 6                | 0              | -3.349354               | -0.109612 | 0.658762  |
| 17               | 6                | 0              | -4.193173               | -1.275338 | 1.080228  |
| 18               | 8                | 0              | -4.048665               | 1.012149  | 0.420769  |
| 19               | 6                | 0              | -5.314232               | -1.647997 | 0.076969  |
| 20               | 6                | 0              | -4.793042               | -1.962433 | -1.326058 |
| 21               | 8                | 0              | -6.341580               | -0.645114 | 0.040210  |
| 22               | 1                | 0              | 5.160947                | -1.843807 | 2.608149  |
| 23               | 1                | 0              | 3.059406                | 0.057511  | -2.319288 |
| 24               | 1                | 0              | 3.468352                | 1.147777  | 1.845369  |
| 25               | 1                | 0              | 5.041588                | -2.600472 | 0.427097  |
| 26               | 1                | 0              | 4.721950                | -3.006295 | -1.826705 |
| 27               | 1                | 0              | 2.824159                | 2.838110  | 0.128740  |
| 28               | 1                | 0              | 2.655859                | 2.395351  | -1.556705 |
| 29               | 1                | 0              | 0.696758                | 0.001096  | 0.206815  |
| 30               | 1                | 0              | -0.598200               | 3.086943  | -0.519226 |
| 31               | 1                | 0              | -1.462208               | -1.073551 | 0.715432  |
| 32               | 1                | 0              | -3.549581               | -2.144376 | 1.240643  |
| 33               | 1                | 0              | -4.668878               | -1.031529 | 2.038645  |
| 34               | 1                | 0              | -3.376010               | 1.708743  | 0.141922  |
| 35               | 1                | 0              | -5.810462               | -2.536831 | 0.479605  |
| 36               | 1                | 0              | -4.317306               | -1.086541 | -1.780948 |
| 37               | 1                | 0              | -5.621564               | -2.273900 | -1.968707 |
| 38               | 1                | 0              | -4.056840               | -2.773058 | -1.294817 |
| 39               | 1                | 0              | -5.913313               | 0.211147  | -0.118527 |

5P:

| Center<br>Number | Atomic<br>Number | Atomic<br>Type | Coordinates (Angstroms) |           |           |
|------------------|------------------|----------------|-------------------------|-----------|-----------|
|                  |                  |                | X                       | Y         | Z         |
| 1                | 8                | 0              | -4.090819               | -2.345228 | -2.042402 |
| 2                | 6                | 0              | -4.191199               | -0.811672 | 1.252618  |
| 3                | 6                | 0              | -3.575195               | 0.424716  | 1.020678  |
| 4                | 6                | 0              | -3.116225               | 0.738539  | -0.261844 |
| 5                | 6                | 0              | -3.283452               | -0.178057 | -1.309887 |
| 6                | 6                | 0              | -3.899902               | -1.408193 | -1.060450 |
| 7                | 6                | 0              | -4.359821               | -1.735824 | 0.219329  |
| 8                | 8                | 0              | -4.619486               | -1.064444 | 2.529875  |
| 9                | 6                | 0              | -2.440777               | 2.067141  | -0.524171 |
| 10               | 6                | 0              | -0.938335               | 2.090056  | -0.384471 |
| 11               | 6                | 0              | -0.156273               | 1.045218  | 0.033997  |
| 12               | 8                | 0              | -0.414837               | 3.276153  | -0.712032 |
| 13               | 6                | 0              | 1.276255                | 1.169450  | 0.144303  |
| 14               | 6                | 0              | 2.063196                | 0.052844  | 0.600238  |
| 15               | 8                | 0              | 1.854087                | 2.283986  | -0.162891 |
| 16               | 6                | 0              | 3.428553                | 0.129097  | 0.722979  |
| 17               | 6                | 0              | 4.288044                | -1.002479 | 1.208672  |
| 18               | 8                | 0              | 4.097641                | 1.248845  | 0.428259  |
| 19               | 6                | 0              | 5.015471                | -1.812604 | 0.114472  |
| 20               | 6                | 0              | 5.983929                | -1.009919 | -0.751746 |
| 21               | 8                | 0              | 3.996220                | -2.440753 | -0.683149 |
| 22               | 1                | 0              | -3.730948               | -2.026429 | -2.882624 |
| 23               | 1                | 0              | -3.460339               | 1.124228  | 1.842575  |
| 24               | 1                | 0              | -2.935032               | 0.063902  | -2.310543 |
| 25               | 1                | 0              | -4.841373               | -2.693866 | 0.390419  |
| 26               | 1                | 0              | -5.027359               | -1.940787 | 2.581572  |
| 27               | 1                | 0              | -2.670178               | 2.417093  | -1.538268 |
| 28               | 1                | 0              | -2.835380               | 2.834366  | 0.154069  |
| 29               | 1                | 0              | -0.623800               | 0.104329  | 0.290998  |
| 30               | 1                | 0              | 0.578043                | 3.187135  | -0.580258 |
| 31               | 1                | 0              | 1.564477                | -0.873542 | 0.855292  |
| 32               | 1                | 0              | 5.046166                | -0.592798 | 1.885170  |
| 33               | 1                | 0              | 3.666696                | -1.696976 | 1.780240  |
| 34               | 1                | 0              | 3.408196                | 1.914308  | 0.126123  |
| 35               | 1                | 0              | 5.580352                | -2.591987 | 0.645402  |
| 36               | 1                | 0              | 5.463148                | -0.232342 | -1.317067 |
| 37               | 1                | 0              | 6.489937                | -1.675487 | -1.460100 |
| 38               | 1                | 0              | 6.751919                | -0.534032 | -0.132961 |
| 39               | 1                | 0              | 4.427419                | -3.005487 | -1.339624 |

5Q:

| Center<br>Number | Atomic<br>Number | Atomic<br>Type | Coordinates (Angstroms) |           |           |
|------------------|------------------|----------------|-------------------------|-----------|-----------|
|                  |                  |                | X                       | Y         | Z         |
| 1                | 8                | 0              | -4.703211               | -1.044119 | 2.504071  |
| 2                | 6                | 0              | -3.900733               | -1.457938 | -1.017625 |
| 3                | 6                | 0              | -3.271734               | -0.243954 | -1.320393 |
| 4                | 6                | 0              | -3.111265               | 0.720321  | -0.320900 |
| 5                | 6                | 0              | -3.588720               | 0.473400  | 0.974172  |
| 6                | 6                | 0              | -4.214882               | -0.744446 | 1.258929  |
| 7                | 6                | 0              | -4.377182               | -1.719164 | 0.269017  |
| 8                | 8                | 0              | -4.028473               | -2.364590 | -2.037556 |
| 9                | 6                | 0              | -2.426762               | 2.032508  | -0.636828 |
| 10               | 6                | 0              | -0.929690               | 2.067132  | -0.450846 |
| 11               | 6                | 0              | -0.150469               | 1.025591  | -0.019029 |
| 12               | 8                | 0              | -0.406850               | 3.258531  | -0.759733 |
| 13               | 6                | 0              | 1.278416                | 1.159029  | 0.123874  |
| 14               | 6                | 0              | 2.063644                | 0.044318  | 0.587122  |
| 15               | 8                | 0              | 1.854759                | 2.279959  | -0.162368 |
| 16               | 6                | 0              | 3.426095                | 0.128074  | 0.735200  |
| 17               | 6                | 0              | 4.284494                | -1.002885 | 1.224172  |
| 18               | 8                | 0              | 4.093177                | 1.254562  | 0.462540  |
| 19               | 6                | 0              | 5.027768                | -1.802518 | 0.132723  |
| 20               | 6                | 0              | 6.000810                | -0.988690 | -0.717969 |
| 21               | 8                | 0              | 4.020390                | -2.430911 | -0.679475 |
| 22               | 1                | 0              | -4.537514               | -0.310110 | 3.112899  |
| 23               | 1                | 0              | -2.914992               | -0.067636 | -2.330229 |
| 24               | 1                | 0              | -3.473342               | 1.222432  | 1.753262  |
| 25               | 1                | 0              | -4.871305               | -2.655487 | 0.510445  |
| 26               | 1                | 0              | -4.475998               | -3.163647 | -1.724349 |
| 27               | 1                | 0              | -2.623117               | 2.322460  | -1.676677 |
| 28               | 1                | 0              | -2.842844               | 2.837504  | -0.018019 |
| 29               | 1                | 0              | -0.616827               | 0.079395  | 0.220033  |
| 30               | 1                | 0              | 0.583519                | 3.175108  | -0.606264 |
| 31               | 1                | 0              | 1.566390                | -0.887483 | 0.824637  |
| 32               | 1                | 0              | 5.033012                | -0.594556 | 1.912036  |
| 33               | 1                | 0              | 3.659463                | -1.703884 | 1.783665  |
| 34               | 1                | 0              | 3.405045                | 1.918229  | 0.153320  |
| 35               | 1                | 0              | 5.591339                | -2.582115 | 0.664709  |
| 36               | 1                | 0              | 5.481530                | -0.210359 | -1.283655 |
| 37               | 1                | 0              | 6.518102                | -1.646546 | -1.425323 |
| 38               | 1                | 0              | 6.759494                | -0.512501 | -0.088011 |
| 39               | 1                | 0              | 4.460958                | -2.992943 | -1.332029 |
